# Supplementary material for: WHO Standards-based questionnaire to measure health workers’ perspective on the quality of care around the time of childbirth in the WHO European region: development and mixed-methods validation in six countries
Source: PubMed Central journal article supplement — BMJ Open. 2022 Apr 8;12(4):e056753. doi: 10.1136/bmjopen-2021-056753 (PMC8995570; doi:10.1136/bmjopen-2021-056753), 2022-04-08
Supplement: bmjopen-2021-056753supp001.pdf [file bmjopen-2021-056753supp001.pdf]

# WHO Standards-based questionnaire to measure health workers' perspective on the quality of care around the time of childbirth in the WHO European Region: development and mixed methods validation in six countries

## [Supplementary files](#)

### Table of Contents

|                                                                                                                          |    |
|--------------------------------------------------------------------------------------------------------------------------|----|
| Supplementary Table 1. Literature review search strategy .....                                                           | 2  |
| Supplementary Table 2. Template for translations and back translations of the health workers' IMAGiNE questionnaire..... | 3  |
| Supplementary Table 3. Structure of the health workers' IMAGiNE questionnaire.....                                       | 4  |
| Supplementary Table 4. The QMNC index of the health workers' IMAGiNE questionnaire                                       | 5  |
| Supplementary Table 5. Internal consistency of the health workers' IMAGiNE questionnaire.....                            | 6  |
| Supplementary Table 6. Intra-rater reliability of the health workers' IMAGiNE questionnaire.....                         | 7  |
| Supplementary Table 7. Final health workers' IMAGiNE questionnaire in English.....                                       | 10 |
| Supplementary Table 8. Final health workers' IMAGiNE questionnaire in Italian .....                                      | 22 |
| Supplementary Table 9. Final health workers' IMAGiNE questionnaire in Portuguese.....                                    | 36 |
| Supplementary Table 10. Final health workers' IMAGiNE questionnaire in Norwegian.....                                    | 50 |
| Supplementary Table 11. Final health workers' IMAGiNE questionnaire in Swedish.....                                      | 63 |
| Supplementary Table 12. Final health workers' IMAGiNE questionnaire in Croatian.....                                     | 77 |
| Supplementary Table 13. Final health workers' IMAGiNE questionnaire in Romanian.....                                     | 91 |

## Supplementary Table 1. Literature review search strategy

|                                                                                                                                                                                                                                                                                                                                                                                                                                                                                                                                                                                                                                                                                                                                                                     |
|---------------------------------------------------------------------------------------------------------------------------------------------------------------------------------------------------------------------------------------------------------------------------------------------------------------------------------------------------------------------------------------------------------------------------------------------------------------------------------------------------------------------------------------------------------------------------------------------------------------------------------------------------------------------------------------------------------------------------------------------------------------------|
| <p><b>ELECTRONIC DATABASE: PubMed</b></p> <p><b>MESH SEARCH STRATEGY:</b> (((((((((((("Women"[Mesh]) OR "Pregnant Women"[Mesh]) OR "Mothers"[Mesh]) OR women) OR woman) OR maternal) OR mother*) OR "pregnant woman")) AND (((("Quality of Health Care"[Mesh]) OR "quality of care") OR "experience of care") OR "provision of care")) AND (((((((("Respect"[Mesh]) OR "Privacy"[Mesh]) OR "Communication"[Mesh]) OR mistreatment*) OR abuse*) OR respect*) OR dignit*) OR privacy) OR communication*)) AND (((((((("Surveys and Questionnaires"[Mesh])) OR survey*) OR questionnaire*) OR scale*) OR "measurement tool*"))</p> <p><b>Date of first search:</b> July 2016 (publication period from 2006/01/01 to 2016/7/31)</p> <p><b>Language limits:</b> none</p> |
| <p><b>HAND SEARCH: Title references of retrieved articles</b></p> <p><b>Date of first search:</b> July 2016 (publication period from 2006/01/01 to 2016/7/31)</p>                                                                                                                                                                                                                                                                                                                                                                                                                                                                                                                                                                                                   |
| <p><b>HAND SEARCH: "Human Rights in Childbirth Eastern Europe Conference" held in Zagreb, April 2015</b></p> <p><b>Date of first search:</b> July 2016 (publication period from 2006/01/01 to 2016/7/31)</p> <p><b>Language limits:</b> none</p>                                                                                                                                                                                                                                                                                                                                                                                                                                                                                                                    |

## Supplementary Table 2. Template for translations and back translations of the health workers' IMAgiNE questionnaire

|                                 |                                                     |                |                |       |
|---------------------------------|-----------------------------------------------------|----------------|----------------|-------|
| Target Language of translation: | Name of person responsible for translation process: | Email address: | Skype address: | Date: |
|---------------------------------|-----------------------------------------------------|----------------|----------------|-------|

### Purpose<sup>1</sup>:

This process aims to ensure quality translation, enabling detection of errors and divergent interpretation of items (reducing potential bias).

### Instructions<sup>1</sup>:

- 1) **Forward translation:** select two independent native target language speakers (with good knowledge of English) to do forward translation. They should work independently; consensus must be reached among forward translators to produce a final version ready for backward translation.
- 2) **Backward translation:** select one native English speaker (with good knowledge of target language) to do backward translation.
- 3) Translators should have an acceptable **background in maternal and neonatal care or women rights advocacy** during childbirth. Keep in mind that translations must be easily understood by the general lay population of women and health care providers from your country.
- 4) If discrepancies arise between forward and backward translations: **Try to solve them through discussion. If you need to adapt questions or sentences to your setting, please inform the coordination Centre.**

**Please feel free to contact us if you need any further information on using this template! Thank you for your collaboration!**

| ORIGINAL TEXT PROVIDED | Forward Translator 1 (initials and professional qualification):<br>Forward Translator 2 (initials and professional qualification): | Back translator (initials and professional qualification):          |
|------------------------|------------------------------------------------------------------------------------------------------------------------------------|---------------------------------------------------------------------|
|                        | Please, insert your consensus translation from English to the target language below                                                | Please insert the translation from target language to English below |
|                        |                                                                                                                                    |                                                                     |
|                        |                                                                                                                                    |                                                                     |
|                        |                                                                                                                                    |                                                                     |
|                        |                                                                                                                                    |                                                                     |

<sup>1</sup> Based on: Wild D, Grove A, Martin M, et al. Principles of Good Practice for the Translation and Cultural Adaptation Process for Patient-Reported Outcomes (PRO) Measures: report of the ISPOR Task Force for Translation and Cultural Adaptation. *Value Health*. 2005;8(2):94-104. doi:10.1111/j.1524-4733.2005.04054.

### Supplementary Table 3. Structure of the health workers' IMAGiNE questionnaire

| Structure                                                       | Item   |
|-----------------------------------------------------------------|--------|
| Section A. Physiological care*                                  | 07 mcq |
| Section B. Emergency care*                                      | 09 mcq |
| Section C. Work organization, data management and communication | 08 mcq |
| Section D. Quality of care and practices performed              | 12 mcq |
| Section E. COVID-19: preparedness and response                  | 10 mcq |
| Section F. Final considerations                                 | 03 mcq |
| Socio demographic data                                          | 13     |
| Open-ended questions                                            | 05     |
| Total number of questions                                       | 67     |

Note: \*Different pathways for health workers who work in maternal or neonatal area with comparable questions

Abbreviation: mcq = multiple choice question

## Supplementary Table 4. The QMNC index of the health workers' IMAGiNE questionnaire

| DOMAINS                                | Number of items | Score options for each answer | Total Score range |
|----------------------------------------|-----------------|-------------------------------|-------------------|
| Provision of care                      | 10              | 0, 5, 10                      | 0-100             |
| Experience of care                     | 10              | 0, 5, 10                      | 0-100             |
| Availability of resources              | 10              | 0, 5, 10                      | 0-100             |
| Organisational changes due to COVID-19 | 10              | 0, 5, 10                      | 0-100             |
| Total QMNC Index                       | 40              | 0, 5, 10                      | 0-400             |

Abbreviation: QMNC = Quality of maternal and neonatal care

## Supplementary Table 5. Internal consistency of the health workers' IMAgINE questionnaire

| Section of the questionnaire | South Europe<br>(Italy and Portugal) |       | Scandinavia<br>(Norway and Sweden) |       | East Europe<br>(Croatia and Romania) |       |
|------------------------------|--------------------------------------|-------|------------------------------------|-------|--------------------------------------|-------|
|                              | n                                    | Alpha | n                                  | Alpha | n                                    | Alpha |
| C                            | 263                                  | 0.70  | 177                                | 0.73  | 131                                  | 0.79  |
| D                            | 256                                  | 0.82  | 177                                | 0.78  | 131                                  | 0.88  |
| E                            | 253                                  | 0.78  | 176                                | 0.82  | 105                                  | 0.83  |

## Supplementary Table 6. Intra-rater reliability of the health workers' IMAGiNE questionnaire

### SECTIONS A and B for MATERNAL AREA

| Item | N   | %    | Percent agreement | Weighted K | Gwet's AC1 |
|------|-----|------|-------------------|------------|------------|
| A1   | 118 | 98.3 | 92.37             | 0.79       | 0.9571     |
| A2   | 118 | 98.3 | 87.29             | 0.62       | 0.9291     |
| A3   | 118 | 98.3 | 83.90             | 0.63       | 0.8160     |
| A4   | 118 | 98.3 | 77.97             | 0.59       | 0.7577     |
| A5.1 | 118 | 98.3 | 83.05             | 0.69       | 0.7189     |
| A5.2 | 118 | 98.3 | 80.51             | 0.62       | 0.8392     |
| A5.3 | 118 | 98.3 | 78.81             | 0.67       | 0.7400     |
| B1   | 118 | 98.3 | 90.68             | 0.72       | 0.9404     |
| B2   | 118 | 98.3 | 87.29             | 0.65       | 0.9380     |
| B3   | 118 | 98.3 | 87.29             | 0.73       | 0.8940     |
| B4   | 118 | 98.3 | 82.20             | 0.66       | 0.7763     |
| B5   | 118 | 98.3 | 88.98             | 0.72       | 0.9428     |
| B6.1 | 118 | 98.3 | 83.90             | 0.65       | 0.8998     |
| B6.2 | 118 | 98.3 | 81.36             | 0.65       | 0.8169     |
| B6.3 | 118 | 98.3 | 82.20             | 0.62       | 0.7813     |
| B6.4 | 118 | 98.3 | 85.59             | 0.76       | 0.8120     |

### SECTIONS A and B for NEONATAL AREA

| Item | N  | %    | Percent agreement | Weighted K | Gwet's AC1 |
|------|----|------|-------------------|------------|------------|
| A1   | 98 | 89.1 | 90.82             | 0.74       | 0.9505     |
| A2   | 98 | 89.1 | 90.82             | 0.75       | 0.9636     |
| A3   | 98 | 89.1 | 87.76             | 0.73       | 0.9094     |
| A4   | 98 | 89.1 | 78.57             | 0.60       | 0.8060     |

|      |    |      |       |       |        |
|------|----|------|-------|-------|--------|
| A5.1 | 98 | 89.1 | 82.65 | 0.59* | 0.7163 |
| A5.2 | 98 | 89.1 | 86.73 | 0.72* | 0.8323 |
| A5.3 | 98 | 89.1 | 74.49 | 0.54  | 0.6415 |
| B1   | 50 | 96.2 | 88.00 | 0.78  | 0.9378 |
| B2   | 50 | 96.2 | 84.00 | 0.68  | 0.8834 |
| B3   | 50 | 96.2 | 86.00 | 0.72  | 0.8949 |
| B4   | 50 | 96.2 | 80.00 | 0.57  | 0.7067 |
| B5   | 50 | 96.2 | 90.00 | 0.78  | 0.8748 |
| B6   | 50 | 96.2 | 88.00 | 0.70  | 0.8397 |

Note: \* Low K due to symmetrical imbalance

#### SECTIONS C, D, E, F

| Item   | N   | %   | Percent agreement | Weighted K | Gwet's AC1 |
|--------|-----|-----|-------------------|------------|------------|
| C1     | 164 | 100 | 84.76             | 0.74       | 0.8217     |
| C2     | 164 | 100 | 81.10             | 0.63       | 0.8197     |
| C3     | 164 | 100 | 85.98             | 0.69       | 0.8926     |
| C4     | 164 | 100 | 78.66             | 0.59*      | 0.8201     |
| C5     | 164 | 100 | 77.44             | 0.61       | 0.6494     |
| C6     | 164 | 100 | 79.27             | 0.57*      | 0.8559     |
| C7     | 164 | 100 | 75.61             | 0.58       | 0.6631     |
| C8     | 164 | 100 | 79.88             | 0.65       | 0.6360     |
| D1     | 164 | 100 | 78.66             | 0.68       | 0.6859     |
| D2     | 164 | 100 | 76.83             | 0.61       | 0.5978     |
| D3     | 164 | 100 | 84.15             | 0.74       | 0.7883     |
| D4     | 164 | 100 | 82.93             | 0.69       | 0.7865     |
| D5.1** | 164 | 100 | 75.61             | 0.58       | 0.5805     |
| D5.2   | 164 | 100 | 76.83             | 0.63       | 0.5884     |
| D6     | 164 | 100 | 79.88             | 0.69       | 0.6919     |
| D7     | 164 | 100 | 73.78             | 0.58*      | 0.5978     |



|      |     |     |       |      |        |
|------|-----|-----|-------|------|--------|
| D8   | 164 | 100 | 75.61 | 0.62 | 0.6032 |
| D9   | 164 | 100 | 76.83 | 0.61 | 0.5657 |
| D10  | 164 | 100 | 81.10 | 0.67 | 0.6840 |
| D11  | 164 | 100 | 77.44 | 0.61 | 0.5736 |
| E1   | 164 | 100 | 87.2  | 0.72 | 0.7681 |
| E2   | 164 | 100 | 90.24 | 0.78 | 0.8337 |
| E3   | 164 | 100 | 89.63 | 0.70 | 0.8408 |
| E4   | 164 | 100 | 87.80 | 0.78 | 0.8082 |
| E5   | 164 | 100 | 85.37 | 0.69 | 0.7704 |
| E6   | 164 | 100 | 82.93 | 0.66 | 0.7444 |
| E7   | 164 | 100 | 81.71 | 0.68 | 0.6815 |
| E8   | 164 | 100 | 79.88 | 0.69 | 0.6636 |
| E9   | 164 | 100 | 83.54 | 0.63 | 0.8441 |
| E10a | 141 | 86  | 82.27 | 0.67 | 0.7736 |
| E10b | 141 | 86  | 85.11 | 0.68 | 0.7292 |
| E10c | 141 | 86  | 80.14 | 0.61 | 0.6423 |
| E10d | 141 | 86  | 85.82 | 0.65 | 0.7744 |
| E10e | 164 | 100 | 88.41 | 0.81 | 0.8429 |
| E10f | 164 | 100 | 88.41 | 0.81 | 0.8126 |
| E10g | 164 | 100 | 85.98 | 0.77 | 0.7375 |
| F1   | 164 | 100 | 90.85 | 0.81 | 0.9466 |
| F2   | 164 | 100 | 81.71 | 0.65 | 0.6152 |
| F3   | 164 | 100 | 82.93 | 0.74 | 0.8764 |

Notes: \* = Low K due to symmetrical imbalance; \*\* = Low K and Low Gwet's AC1

## Supplementary Table 7. Final health workers' IMAGiNE questionnaire in English

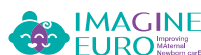

International Project

# IMAGiNE EURO

(Improving MATernal Newborn carE in the European Region)

*Online survey on the preparedness, quality and resilience of the maternal and newborn health service among countries of the WHO European Region during the COVID-19 pandemic*

*The survey is based on WHO Standards to improve the quality of maternal and newborn care in health facilities.*

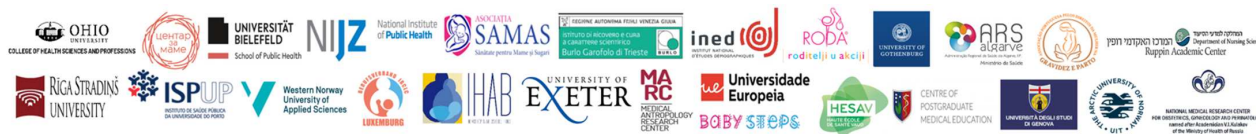

**Are you a healthcare professional directly involved in maternal/neonatal care at facility level during the COVID-19 pandemic?  
Take part in the survey: your opinion matters**

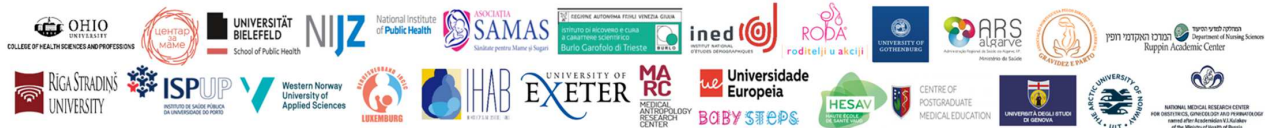

Your participation is voluntary: It will take approximately **15 minutes**.

The survey is based on *WHO Standards for improving maternal and newborn care in health facilities*.

**Please note:** the survey is dedicated to general physicians currently working in maternal/neonatal care, midwives, nurses, neonatologists, obstetricians and gynaecologists, and to obstetrics and gynaecology registrars or neonatology registrars.

**We're committed to your privacy.**

**To understand more about the study, the processing of data collected and what we do with data, please read the Informed Consent and the Privacy Policy available in the document downloadable at the link below.**

Please note: the survey is dedicated to general physicians currently working in maternal/neonatal care, midwives, nurses, neonatologists, obstetricians and gynaecologists, and to obstetrics and gynaecology registrars or neonatology registrars.

If you do not recognize yourself in the healthcare professionals listed above, please, save your time and close the link.

Anyway, we thank you so much for your interest in our research.

If you know someone who can participate, please share the link with him/her.

Once again, Thank you for your time.

**By providing consent to the following question, you voluntarily decide to participate in the survey.**

**CONSENT TO PARTICIPATION:**

**I am a healthcare professional who has been directly involved in maternal or neonatal care at facility level for over a year.**

**I have also been directly involved in maternal or neonatal care at facility level since 1<sup>st</sup> of March 2020.**

**I have read and understood the consent form in the previous page, and, by selecting "Yes" below, I indicate my willingness to voluntarily take part in the study.**

1) Yes (→S1)

2) No (the questionnaire can't be filled in → a message will be available to thank them for their interest)

**If NO:** Participating will take approximately 15 minutes. If you know someone who would participate, please share the link with them. Thank you for your time! We wish you a good day!

**SCREENING QUESTIONS:**

**S1: Are you a healthcare professional who has been directly involved in maternal/neonatal care at a facility for more than 1 year?**

3) Yes (→S2)

4) No (the questionnaire can't be filled in → a message will be available to thank them for their interest)

**If NO:** Thank you for your interest in our research. To participate it is necessary to have been directly involved in maternal/neonatal care at facility level for more than 1 year.

If you know someone who has, please share the link with them.

Thank you for your time! We wish you a good day!

**S2: Have you been directly involved in maternal or neonatal care at a facility from 1<sup>st</sup> of March 2020?**

1) Yes (→ S3)

2) No (the questionnaire can't be filled in → a message will be available to thank them for their interest)

**If NO:** Thank you for your interest in our research. To participate it is necessary to have been directly in maternal/neonatal care at facility level at least from 1st March 2020.

If you know someone who has, please share the link with them.

Thank you for your time! We wish you a good day!

**S3. Type of maternal/neonatal care facility you work for:**

**Note:** If you work in more than one maternal/neonatal facility, please select the one you will think about when answering the questions' survey

1) Public maternal/neonatal facility or clinic

2) Private maternal/neonatal facility or clinic

**S4. What is your professional qualification?**

1) General physician currently working in maternal care (→Maternal area: section A-B)

2) General physician currently working in neonatal care (→Neonatal area: section A-B)

3) Midwife (→S4a)

4) Nurse in maternal care (→Maternal area: section A-B)

5) Nurse in neonatal care (postpartum ward, nursery or NICU) (→Neonatal area: section A-B)

6) Neonatologist physician (→Neonatal area: section A-B)

7) Obstetrics and gynaecology physician (→Maternal area: section A-B)

8) Registrar/Medical resident in obstetrics and gynaecology (→Maternal area: section A-B)

9) Registrar/ Medical resident in neonatology (→Neonatal area: section A-B)

**S4a. In which area do you mainly work?**

1) I currently work mainly in the maternal area (→Maternal area: section A-B)

2) I currently work mainly in the neonatal area (→Neonatal area: section A-B)

3) I work in both areas (maternal and neonatal) (→Both maternal and neonatal areas: section A-B)

## Maternal area (Section A - Section B)

A. With respect to care for **healthy pregnant women** undergoing spontaneous labour, in the area/department where you work:

|                                                                                                                                                                                       | 1)Yes | 2)Yes, but needs some improvement | 3)No, it needs significant improvement |
|---------------------------------------------------------------------------------------------------------------------------------------------------------------------------------------|-------|-----------------------------------|----------------------------------------|
| A1. Adequate <b>physical infrastructures</b> are present (i.e., water, electricity, sanitation, areas for labour are available and logically designed to maintain continuity of care) |       |                                   |                                        |
| A2. Appropriate <b>equipment and supplies</b> are provided for essential care in sufficient quantities at all times                                                                   |       |                                   |                                        |

|                                                                                                                                                                                                                       |       |                                   |                                        |
|-----------------------------------------------------------------------------------------------------------------------------------------------------------------------------------------------------------------------|-------|-----------------------------------|----------------------------------------|
| A3. Written comprehensive guidelines or protocols on recommended clinical procedures <b>for healthy pregnant women</b> , updated based on latest evidences (Evidence-Based Medicine, EBM) are available for all staff |       |                                   |                                        |
| A4. Effective in-service <b>supportive supervision</b> is organized to improve personal practical skills (i.e., tutoring)                                                                                             |       |                                   |                                        |
| A5. Have you participated (at least one event in the last three years) in effective and specific training events to strengthen your skills...                                                                         | 1)Yes | 2)Yes, but needs some improvement | 3)No, it needs significant improvement |
| A5.1 in the use of partograph?                                                                                                                                                                                        |       |                                   |                                        |
| A5.2 in foetal heart rate monitoring (e.g., intermittent foetal heart rate auscultation during labour and/or CTG interpretation)?                                                                                     |       |                                   |                                        |
| A5.3 in how to reduce unnecessary caesarean sections (e.g., induction of labour training, caesarean section indications)?                                                                                             |       |                                   |                                        |

- B. Regarding most **serious obstetric emergencies** (e.g., postpartum haemorrhage, eclampsia, shoulder dystocia, cardiovascular arrest in a pregnant woman, etc.) in the maternal and neonatal area/department where you work:

|                                                                                                                                                                                                                                     |       |                                   |                                        |
|-------------------------------------------------------------------------------------------------------------------------------------------------------------------------------------------------------------------------------------|-------|-----------------------------------|----------------------------------------|
|                                                                                                                                                                                                                                     | 1)Yes | 2)Yes, but needs some improvement | 3)No, it needs significant improvement |
| B1. Adequate <b>physical infrastructures</b> are present (i.e., water, electricity, sanitation, areas for urgent procedures are available and logically designed to provide essential care)                                         |       |                                   |                                        |
| B2. Appropriate <b>equipment and supplies</b> are provided for essential care in sufficient quantities at all times                                                                                                                 |       |                                   |                                        |
| B3. Written comprehensive <b>guidelines or protocols</b> on recommended clinical procedures <b>for serious obstetric emergencies</b> , updated based on latest evidences (Evidence-Based Medicine, EBM) are available for all staff |       |                                   |                                        |
| B4. Effective in-service <b>supportive supervision</b> is organized to improve personal practical skills (i.e., tutoring)                                                                                                           |       |                                   |                                        |
| B5. When needed, the <b>referral and transport system</b> is functional and provides care with an adequate quality (i.e., safe, available without delay 24h/7days)                                                                  |       |                                   |                                        |

|                                                                                                                                               |       |                                   |                                        |
|-----------------------------------------------------------------------------------------------------------------------------------------------|-------|-----------------------------------|----------------------------------------|
| B6. Have you participated (at least one event in the last three years) in effective and specific training events to strengthen your skills... | 1)Yes | 2)Yes, but needs some improvement | 3)No, it needs significant improvement |
| B6.1 in how to handle postpartum haemorrhage?                                                                                                 |       |                                   |                                        |
| B6.2 in how to handle eclampsia?                                                                                                              |       |                                   |                                        |
| B6.3 in how to handle shoulder dystocia?                                                                                                      |       |                                   |                                        |
| B6.4 in how to handle cardiovascular arrest in a pregnant woman?                                                                              |       |                                   |                                        |

## Neonatal area (Section A - Section B)

- A. With respect to the care of a **newborn without complications**, in the area/department where you work:

|  |       |                                   |                                        |
|--|-------|-----------------------------------|----------------------------------------|
|  | 1)Yes | 2)Yes, but needs some improvement | 3)No, it needs significant improvement |
|--|-------|-----------------------------------|----------------------------------------|

|                                                                                                                                                                                                                           |  |  |  |
|---------------------------------------------------------------------------------------------------------------------------------------------------------------------------------------------------------------------------|--|--|--|
| A1. Adequate <b>physical infrastructures</b> are present (i.e., water, electricity, sanitation, areas for healthy neonates are available and logically designed to maintain continuity of care)                           |  |  |  |
| A2. Appropriate <b>equipment and supplies</b> are provided for essential care in sufficient quantities at all times                                                                                                       |  |  |  |
| A3. Written comprehensive <b>guidelines or protocols</b> on recommended clinical procedures <b>for the healthy newborn</b> , updated based on latest evidences (Evidence-Based Medicine, EBM) are available for all staff |  |  |  |
| A4. Effective in-service <b>supportive supervision</b> is organized to improve personal practical skills (i.e., tutoring).                                                                                                |  |  |  |

|                                                                                                                                               |       |                                   |                                        |
|-----------------------------------------------------------------------------------------------------------------------------------------------|-------|-----------------------------------|----------------------------------------|
| A5. Have you participated (at least one event in the last three years) in effective and specific training events to strengthen your skills... | 1)Yes | 2)Yes, but needs some improvement | 3)No, it needs significant improvement |
| A5.1 in the breastfeeding promotion, support and counselling?                                                                                 |       |                                   |                                        |
| A5.2 in skin-to-skin promotion and on how to keep the newborn warm?                                                                           |       |                                   |                                        |
| A5.3 in standards precautions (e.g., cord care, immunizations, assessment of danger signs)?                                                   |       |                                   |                                        |

B. Regarding to the most **serious neonatal emergencies** (e.g., presence of meconium-stained amniotic fluid, preterm or low-birth-weight newborn, suspected neonatal sepsis etc.), in the maternal and neonatal area/department where you work:

|                                                                                                                                                                                                                          |       |                                   |                                        |
|--------------------------------------------------------------------------------------------------------------------------------------------------------------------------------------------------------------------------|-------|-----------------------------------|----------------------------------------|
|                                                                                                                                                                                                                          | 1)Yes | 2)Yes, but needs some improvement | 3)No, it needs significant improvement |
| B1. Adequate <b>physical infrastructures</b> are present (i.e., water, electricity, sanitation, areas for sick neonates are available and logically designed to provide essential care)                                  |       |                                   |                                        |
| B2. Appropriate <b>equipment and supplies</b> are provided for essential care in sufficient quantities at all times                                                                                                      |       |                                   |                                        |
| B3. Written comprehensive <b>guidelines or protocols</b> on recommended clinical procedures <b>on newborn emergencies</b> , updated based on latest evidences (Evidence-Based Medicine, EBM) are available for all staff |       |                                   |                                        |
| B4. Effective in-service <b>supportive supervision</b> is organized to improve personal practical skills (i.e., tutoring).                                                                                               |       |                                   |                                        |
| B5. When needed, the <b>referral and transport system</b> is functional and provides care with an adequate quality (i.e., safe, available without delay 24h/7days)                                                       |       |                                   |                                        |

|                                                                                                                                                                                           |       |                                   |                                        |
|-------------------------------------------------------------------------------------------------------------------------------------------------------------------------------------------|-------|-----------------------------------|----------------------------------------|
| B6. Have you participated (at least one event in the last three years) in effective and specific training events to strengthen your skills in how to handle resuscitation of the newborn? | 1)Yes | 2)Yes, but needs some improvement | 3)No, it needs significant improvement |
|                                                                                                                                                                                           |       |                                   |                                        |
|                                                                                                                                                                                           |       |                                   |                                        |

**Please note:** there are three different versions of question Q1 for the three possible questionnaire paths.

For healthcare professionals working in the **maternal area**:

**Q1. Please give your suggestions and / or comments to improve the care for healthy pregnant women and most serious obstetric emergencies and/or respect to the care of a newborn without complications.**

For healthcare professionals working in the **neonatal area**:  
**Q1. Please give your suggestions and / or comments to improve the care of a newborn without complications and the most serious neonatal emergencies.**

For midwives working in **both maternal and neonatal area**:  
**Q1. Please give your suggestions and / or comments to improve the care for healthy pregnant women and most serious obstetric emergencies and/or respect to the care of a newborn without complications and/or the most serious neonatal emergencies.**

### C. Work organization, data management and communication

Regarding **work organization**, in the maternal and neonatal area/department where you work:

|                                                                                                                                                            | 1)Yes | 2)Yes, but needs some improvement | 3)No, it needs significant improvement |
|------------------------------------------------------------------------------------------------------------------------------------------------------------|-------|-----------------------------------|----------------------------------------|
| C1. There is <b>sufficient number of healthcare professionals</b> to ensure adequate care                                                                  |       |                                   |                                        |
| C2. The <b>roles and responsibilities</b> of each healthcare professional are clearly written and comprehensively defined                                  |       |                                   |                                        |
| C3. <b>Hand-over</b> during shifts is effective and complete in all relevant aspects of care, respecting and protecting the confidentiality of information |       |                                   |                                        |

Regarding **data collection and use**, in the maternal and neonatal area/department where you work:

|                                                                                                                                                                                                                                                                                                                                                 | 1)Yes | 2)Yes, but needs some improvement | 3)No, it needs significant improvement |
|-------------------------------------------------------------------------------------------------------------------------------------------------------------------------------------------------------------------------------------------------------------------------------------------------------------------------------------------------|-------|-----------------------------------|----------------------------------------|
| C4. There is a <b>clinical data collection system</b> (e.g., written or computer registry) that is complete, accurate, reliable and easy to consult                                                                                                                                                                                             |       |                                   |                                        |
| C5. There is a <b>list of pre-identified indicators of quality of care</b> (e.g., rate of the following practices: caesarean sections using Robson classification, episiotomies, Kristeller, inductions, breastfeeding, skin to skin, kangaroo-care etc.), used to compile statistical reports to be regularly shared and discussed among staff |       |                                   |                                        |

Regarding **communication**, in the maternal and neonatal area/department where you work:

|                                                                                                                                                                                                                                                                             | 1)Yes | 2)Yes, but needs some improvement | 3)No, it needs significant improvement |
|-----------------------------------------------------------------------------------------------------------------------------------------------------------------------------------------------------------------------------------------------------------------------------|-------|-----------------------------------|----------------------------------------|
| C6. In general, healthcare professionals have an <b>effective communication with women and families</b> (e.g., making sure they understand and/or giving the opportunity to ask questions and freely express opinions) using simple and culturally acceptable language      |       |                                   |                                        |
| C7. Women and their families are provided with <b>clear educational materials</b> related to maternal and newborn health, in an accessible form (written, digital or pictorial), available in all the languages of the communities served by the maternal/neonatal facility |       |                                   |                                        |

|                                                                                                                                                                                                                                          |  |  |  |
|------------------------------------------------------------------------------------------------------------------------------------------------------------------------------------------------------------------------------------------|--|--|--|
| C8. You have participated in <b>effective training events to strengthen your specific skills on interpersonal communication</b> and counselling (e.g. on informed consent request) (at least one training event in the last three years) |  |  |  |
|------------------------------------------------------------------------------------------------------------------------------------------------------------------------------------------------------------------------------------------|--|--|--|

Q2. Please give your suggestions and / or comments to improve the **work organization, data collection and use and communication**.

|  |
|--|
|  |
|--|

## D. Quality of care and practices performed

Regarding **emotional, psychological and decision-making support**, in the maternal and neonatal area/department where you work:

|                                                                                                                                                                                                                                                                                                                                                                                       | 1)Yes | 2)Yes, but needs some improvement | 3)No, it needs significant improvement |
|---------------------------------------------------------------------------------------------------------------------------------------------------------------------------------------------------------------------------------------------------------------------------------------------------------------------------------------------------------------------------------------|-------|-----------------------------------|----------------------------------------|
| D1. The possibility for all women to have a <b>companion of choice</b> for as long as they deem necessary is guaranteed (i.e., throughout all the phases of labour, childbirth and postpartum period)                                                                                                                                                                                 |       |                                   |                                        |
| D2. You have participated in <b>effective training events to strengthen specific skills in providing emotional support to women and empowering</b> them during birth and / or post-partum period (e.g., understanding the influences of emotional status on oxytocin release and teaching practical methods to manage emotions) (at least one training event in the last three years) |       |                                   |                                        |

Regarding the **protection of privacy of women**, in the maternal and neonatal area/department where you work:

|                                                                                                                                                                                                                                                 | 1)Yes | 2)Yes, but needs some improvement | 3)No, it needs significant improvement |
|-------------------------------------------------------------------------------------------------------------------------------------------------------------------------------------------------------------------------------------------------|-------|-----------------------------------|----------------------------------------|
| D3. Adequate <b>infrastructure is available to ensure the privacy of women and their families</b> (e.g., private rooms for visits, availability of curtains or dividers between facility beds, adequate number of facility beds per room, etc.) |       |                                   |                                        |
| D4. All necessary <b>measures to guarantee privacy</b> and confidentiality of women and their families are implemented (e.g., private information is discussed in a way that others cannot hear etc)                                            |       |                                   |                                        |

Q3. Please give your suggestions and / or comments to improve the **emotional, psychological and decision-making support** and/or the **protection of privacy of women**.

|  |
|--|
|  |
|--|

**Please note:** there are two different versions of question D5.1 for the three possible questionnaire paths; midwives who work in both maternal and neonatal area should answer both versions.

Regarding the **right of women to an informed choice** in the maternal and neonatal area/department where you work:

For healthcare professionals working in the **maternal area**:

|                                                                                                                                                                  | 1)Yes | 2)Yes, but needs some improvement | 3)No, it needs significant improvement |
|------------------------------------------------------------------------------------------------------------------------------------------------------------------|-------|-----------------------------------|----------------------------------------|
| D5.1. Is there written/digital material available for health workers to use to better inform women about the risks and benefits of the following two procedures: |       |                                   |                                        |



|                        |  |  |  |
|------------------------|--|--|--|
| a) Caesarean section   |  |  |  |
| b) Induction of labour |  |  |  |

For healthcare professionals working in the **neonatal area**:

|                                                                                                                                                                  |       |                                   |                                        |
|------------------------------------------------------------------------------------------------------------------------------------------------------------------|-------|-----------------------------------|----------------------------------------|
| D5.1. Is there written/digital material available for health workers to use to better inform women about the risks and benefits of the following two procedures: | 1)Yes | 2)Yes, but needs some improvement | 3)No, it needs significant improvement |
| a) Newborn Vitamin K administration                                                                                                                              |       |                                   |                                        |
| b) Newborn eye drops/ointment application                                                                                                                        |       |                                   |                                        |

Regarding the **right of women to an informed choice** in the maternal and neonatal area/department where you work:

|                                                                                                                                                                                                                                    |       |                                   |                                        |
|------------------------------------------------------------------------------------------------------------------------------------------------------------------------------------------------------------------------------------|-------|-----------------------------------|----------------------------------------|
|                                                                                                                                                                                                                                    | 1)Yes | 2)Yes, but needs some improvement | 3)No, it needs significant improvement |
| D5.2. There are regular orientation sessions available to women during pregnancy with the aim of better informing women <b>for procedures requiring consent</b>                                                                    |       |                                   |                                        |
| D6. You have participated in effective <b>training</b> events on how to appropriately <b>inform women</b> and favour informed choice on key procedures related to childbirth (at least one training event in the last three years) |       |                                   |                                        |

Considering other aspects of **quality of care**, in the maternal and neonatal area/department where you work:

|                                                                                                                                                                                                                                                                           |       |                                   |                                        |
|---------------------------------------------------------------------------------------------------------------------------------------------------------------------------------------------------------------------------------------------------------------------------|-------|-----------------------------------|----------------------------------------|
|                                                                                                                                                                                                                                                                           | 1)Yes | 2)Yes, but needs some improvement | 3)No, it needs significant improvement |
| D7. There is a <b>team in your department / unit dedicated to improving the quality of care</b> and the team is effectively operating                                                                                                                                     |       |                                   |                                        |
| D8. <b>Meetings</b> are organized, at least once a week, <b>to discuss</b> the most relevant clinical cases with all healthcare professionals involved in care                                                                                                            |       |                                   |                                        |
| D9. In case of <b>maternal and/or neonatal death</b> , open and constructive <b>meetings /audits are organized</b> , with all healthcare professionals involved in care, to analyse the case and agree on actions to improve the quality of care                          |       |                                   |                                        |
| D10. You have participated in effective and specific training events <b>covering the rights of women and newborns</b> during childbirth and postnatal period <b>in the facility</b> (at least one training event in the last three years)                                 |       |                                   |                                        |
| D11. You have participated in effective and specific training events <b>on practices for pain relief in women</b> (pharmacological and non-pharmacological) and / or <b>prevention/management of newborns' pain</b> (at least one training event in the last three years) |       |                                   |                                        |

Q4. Please give your suggestions and / or comments to improve the rights of women to an informed choice and other aspects of **quality of care**.

|  |
|--|
|  |
|--|

## E. COVID-19: preparedness and response

Since the beginning of the COVID-19 pandemic, what was the level of **preparedness and response** in the maternal and neonatal area/department where you work, in regard to the items listed below:

|                                                                                                                                                                                                                                                              | 1) Existing and/or adequate since the beginning of pandemic | 2) Not always existing and/or not fully adequate (e.g., lacking in the first phase of the pandemic) | 3) Never existed and/or never adequate since the beginning of pandemic up till now |
|--------------------------------------------------------------------------------------------------------------------------------------------------------------------------------------------------------------------------------------------------------------|-------------------------------------------------------------|-----------------------------------------------------------------------------------------------------|------------------------------------------------------------------------------------|
| E1. A dedicated path for patients with suspected / confirmed COVID-19 from the moment they enter the maternal and/or neonatal area/department, has been established to reduce the risk of infection                                                          |                                                             |                                                                                                     |                                                                                    |
| E2. Personal protective equipment (e.g., masks, gloves, gowns) for healthcare professionals have been regularly distributed in sufficient number                                                                                                             |                                                             |                                                                                                     |                                                                                    |
| E3. An appropriate number of hand hygiene stations (equipped with water, soap, paper towel or alcohol solution) functioning and accessible to all healthcare professionals, women and their relatives have been made available.                              |                                                             |                                                                                                     |                                                                                    |
| E4. Guidelines, clear and up to date based on international recommendations (e.g., WHO, FIGO, NICE, RCOG etc.) specific for assistance to women and / or newborns have been made accessible to all healthcare professionals                                  |                                                             |                                                                                                     |                                                                                    |
| E5. Equipment and supplies for diagnostic testing for COVID-19 (i.e., nasopharyngeal swabs and reagents) have been made available in sufficient quantities for all suspected cases among both women/newborns and healthcare professionals                    |                                                             |                                                                                                     |                                                                                    |
| E6. Adequate training for healthcare professionals covering key procedures imposed by the COVID-19 pandemic (e.g., transmission prevention, appropriate use of personal protective equipment, etc.) has been made accessible to all healthcare professionals |                                                             |                                                                                                     |                                                                                    |

Since the beginning of the COVID-19 pandemic, did the following situations ever happen, in the maternal and neonatal area/department where you work?

|                                                                                                                                                                                             | 1) Never happened | 2) Happened during the COVID-19 pandemic (either only in selected phases or all through) | 3) Happened independently from the COVID-19 pandemic |
|---------------------------------------------------------------------------------------------------------------------------------------------------------------------------------------------|-------------------|------------------------------------------------------------------------------------------|------------------------------------------------------|
| E7. Closure of maternity wards and / or reduction in the number of routine services (e.g., outpatient visits, ultrasound checks, day care) and / or reduction of beds for women or newborns |                   |                                                                                          |                                                      |
| E8. Insufficient number of healthcare professionals to provide essential maternal and newborn care                                                                                          |                   |                                                                                          |                                                      |
| E9. Silencing (censorship) of staff to avoid reporting inadequate clinical and / or administrative procedures                                                                               |                   |                                                                                          |                                                      |

E10. Since the beginning of COVID-19 pandemic, has any of the other following situations ever happened in the maternal and neonatal area/department where you work?

|                                                                                                                                                                                                                                                                                                       | 1) Never happened | 2) Happened during the COVID-19 pandemic (either only in selected phases or all through) | 3) Happened independently from the COVID-19 pandemic |
|-------------------------------------------------------------------------------------------------------------------------------------------------------------------------------------------------------------------------------------------------------------------------------------------------------|-------------------|------------------------------------------------------------------------------------------|------------------------------------------------------|
| E10a. Increasing medicalization of the childbirth process (i.e., inappropriate use of oxytocin, increased rate of episiotomies, operative delivery and / or caesarean sections, etc.)                                                                                                                 |                   |                                                                                          |                                                      |
| E10b. Restrictions on the companion of choice, in the absence of clear clinical indications                                                                                                                                                                                                           |                   |                                                                                          |                                                      |
| E10c. Limitations on freedom of movement during labour, in the absence of clear clinical indications                                                                                                                                                                                                  |                   |                                                                                          |                                                      |
| E10d. Limitations on pain relief options (pharmacological and non-pharmacological) to all women who request it, during all phases of labour                                                                                                                                                           |                   |                                                                                          |                                                      |
| E10e. Limitations on rooming-in, in the absence of clear clinical indications                                                                                                                                                                                                                         |                   |                                                                                          |                                                      |
| E10f. Limitations on breastfeeding, in the absence of clear clinical indications (please, note: international guidelines currently do not indicate COVID-19 positivity without severe disease as a clear clinical indication to limit breastfeeding)                                                  |                   |                                                                                          |                                                      |
| E10g. Limitations on skin-to-skin contact in the first hour after childbirth, in the absence of clear clinical indications (please, note: international guidelines currently do not indicate COVID-19 positivity without severe disease as a clear clinical indication to limit skin-to-skin contact) |                   |                                                                                          |                                                      |

Q5. Please give your suggestions and / or comments to improve the level of **preparedness and response** in the maternal and neonatal area/department where you work during COVID-19 pandemic.

## F. Final considerations

F1. Overall, do you think that the area/department where you work responded adequately to the COVID-19 pandemic?

- 1) Yes, the maternal and neonatal area/department responded adequately
- 2) Yes, but the response needs some improvement
- 3) No, the response needs significant improvement

F2. Did your work-related stress levels change during the COVID-19 pandemic?

- 1) Significantly increased
- 2) Slightly increased
- 3) Not changed
- 4) Slightly decreased
- 5) Significantly decreased

F3. Overall, since the beginning of the pandemic and up till now, how satisfied are you with your job?

|                    |                |            |              |                   |
|--------------------|----------------|------------|--------------|-------------------|
| 1-very unsatisfied | 2- unsatisfied | 3- neutral | 4- satisfied | 5- very satisfied |
|--------------------|----------------|------------|--------------|-------------------|

## G. Socio-demographic data

G1. How many years have you been working in the maternal or neonatal health care area?

- 1) Less than 5
- 2) Between 5 and 10
- 3) More than 10

G2. In what country do you work? (Please choose the country)

List of 53 countries in the WHO European region.

If the HW answered from the following countries will be available an additional question specifying the region: Bosnia, Croatia, France, Germany, Italy, Norway, Portugal, Romania, Serbia, Spain, Sweden, UK.

G2a. If healthcare professional does not find the country where he/she works: the research is exclusive to the WHO European region, which includes 53 countries, covering a vast geographical region from the Atlantic to the Pacific oceans.

If you can't find your country in the list, where are you from? Please, specify.

G3. How old are you?

- 1) 20-29
- 2) 30-39
- 3) 40-49
- 4) 50-59
- 5) 60-69
- 6) >=70

G4. How would you describe your gender?

- 1) Male
- 2) Female
- 3) Other
- 4) Prefer to self-describe as non-binary / gender-fluid / agender
- 5) I prefer not to answer

G5. Date of filling out the survey (day-month-year): \_\_\_\_\_

**Note:** this will help us to interpret results in the light of the different phases of COVID-19 pandemic in each country.

G6. Would you like to receive by email the results of this study once it is finished?

Data will be treated in accordance with the guidelines for the processing of personal data and your email address will not be disclosed at any stage not shared with others.

- 1) Yes (→ G6a)
- 2) No

G6a. Your email address will not be linked in any way to the responses of this survey.

Pursuant to and for the purposes of articles 13 and 23 of Legislative Decree n. 196/2003, by giving my email contact in this form, related to the processing of personal data according to the methods and within the limits set out in the reported in the aforementioned policy:

*"I voluntary give my contact email to receive results of this survey once it's finished" \_\_\_\_\_*

G7. How did you hear about this study? (Choose all that apply)

- 1) Social media platform you engage in (Facebook/Instagram)
- 2) Internet search (e.g., Google)
- 3) Received email from friend/family/work/colleague
- 4) Word of mouth
- 5) Press (e.g., radio, print media, TV)
- 6) Other

Q6. Please give us your suggestions to improve the quality of maternal and neonatal care provided at the maternal and neonatal area/department where you work and/or to improve this survey

**Pressing the "submit" button below, you will send your answers.**

**If you wish to contact the research team in your country, please download the file below.**

**You have finished: thank you for taking time to complete this survey.  
We wish you a good day!**

## Supplementary Table 8. Final health workers' IMAGiNE questionnaire in Italian

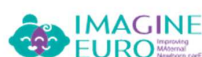

Progetto internazionale

# IMAGiNE EURO

(Improving MATernal Newborn carE in the European Region)

*Migliorare la qualità delle cure materno-neonatali nella regione europea dell'OMS: Survey online sulla preparazione, sulla qualità e sulla resilienza del servizio sanitario materno-neonatale tra i paesi della Regione europea dell'OMS durante la pandemia di COVID-19.*

*L'indagine è basata sugli Standard OMS per migliorare la qualità delle cure materne-neonatali nelle strutture ospedaliere.*

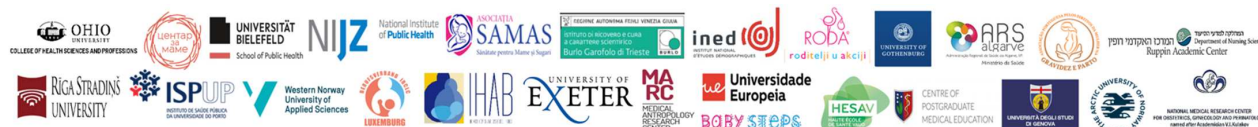

**Sei un operatore sanitaria direttamente coinvolto nell'assistenza ospedaliera  
materna-neonatale durante la pandemia COVID-19?  
Partecipa al questionario: la tua opinione per noi conta.**

La partecipazione è volontaria: ci vorranno approssimativamente **15 minuti**.

L'indagine è basata sugli Standard OMS per migliorare la qualità delle cure materne-neonatali

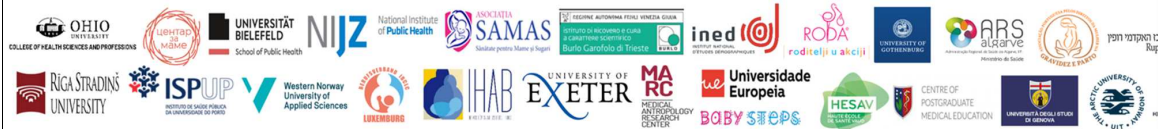

nelle strutture ospedaliere.

**Attenzione:** l'indagine è dedicata ai professionisti attualmente coinvolti nell'assistenza materno-neonatale, medici ginecologi-ostetrici, neonatologi, ostetriche, infermieri, e agli specializzandi di ostetricia e ginecologia o agli specializzandi di neonatologia.

**Il questionario è anonimo: per noi è importante rispettare la tua privacy.**

**Per ulteriori informazioni sul trattamento dei dati raccolti e sul loro utilizzo, ti preghiamo di fare riferimento alla nostra politica sulla privacy e sul consenso informato disponibile nel documento scaricabile al seguente link [link con PDF].**

Attenzione: l'indagine è dedicata ai professionisti attualmente coinvolti nell'assistenza materno-neonatale, medici ginecologi-ostetrici, neonatologi, ostetriche, infermieri, e agli specializzandi di ostetricia e ginecologia o agli specializzandi di neonatologia.

Se non ti riconosci tra gli operatori sanitari sopra elencati, risparmia il tuo tempo e chiudi il link. Ti ringraziamo comunque tantissimo per il tuo interesse nella nostra ricerca.

Se conosci qualcuno che può partecipare, condividi il link con lui / lei.

Grazie ancora per il tuo tempo.

**Fornendo il consenso alla seguente domanda dichiaro di essere maggiorenne e decido volontariamente di partecipare all'indagine.**

**CONSENSO ALLA PARTECIPAZIONE:**

**Ho letto e compreso il modulo di consenso precedentemente presentato e, selezionando "Sì" qui di seguito, indico la mia disponibilità a partecipare volontariamente all'indagine online.**

1, Sì (→S1.)

2, No (→Messaggio automatico: La partecipazione richiederà circa 15 minuti. Se conosce qualcuno che vorrebbe partecipare, condivida, per favore, il link con lui/lei. Grazie per il suo tempo! Le auguriamo una buona giornata!)

**Domande iniziali:****S1. Sei un operatore sanitario direttamente coinvolto nell'assistenza ospedaliera materno-neonatale da almeno un anno?**

- 1) Sì (→S2.)
- 2) No (Il questionario non potrà essere compilato→ “Grazie per il tuo interesse per questo progetto.

Per partecipare è necessario essere stati direttamente coinvolti nell'assistenza materno-neonatale a livello ospedaliero da oltre 1 anno. Se conosci qualcuno con questa caratteristica, aiutaci cortesemente a diffondere il progetto: condividi il link tra altri tuoi conoscenti. Grazie per il tuo tempo! Ti auguriamo una buona giornata!”)

**S2. Sei stato direttamente coinvolto nell'assistenza ospedaliera materno-neonatale dal primo marzo 2020?**

- 1) Sì (→S3.)
- 2) No (Il questionario non potrà essere compilato→ “Grazie per il tuo interesse per questo progetto.

Per partecipare è necessario essere stati direttamente coinvolti nell'assistenza materno-neonatale a livello ospedaliero da oltre 1 anno. Se conosci qualcuno con questa caratteristica, aiutaci cortesemente a diffondere il progetto: condividi il link tra altri tuoi conoscenti. Grazie per il tuo tempo! Ti auguriamo una buona giornata!”)

**S3. Tipo di struttura materno-neonatale per cui lavori:**

Nota: se lavori in più di una struttura materno-neonatale, seleziona quella a cui penserai rispondendo alle domande del sondaggio

- 1) Struttura o clinica materno-neonatale pubblica
- 2) Struttura o clinica materno-neonatale privata

**S4. Qual è la tua qualifica personale?**

- 1) Medico generico dell'area materna (→Area materna: sezione A-B.)
- 2) Medico generico dell'area neonatale (→Area neonatale: sezione A-B.)
- 3) Ostetrica (→S4a.)
- 4) Infermiera/e dell'area materna (→Area materna: sezione A-B.)
- 5) Infermiere/e dell'area neonatale (area di degenza post-partum, asilo nido o TIN) (→Area neonatale: sezione A-B.)
- 6) Medico neonatologo (→Area neonatale: sezione A-B.)
- 7) Medico ostetrico-ginecologo (→Area materna: sezione A-B.)
- 8) Specializzando di ostetricia-ginecologia (→Area materna: sezione A-B.)
- 9) Specializzando di neonatologia (→Area neonatale: sezione A-B.)

**S4a. In che area lavori prevalentemente?**

- 1) Attualmente lavoro principalmente nell'area materna (es., area travaglio, parto, postpartum, o in reparto con anche i neonati fisiologici) (→Area materna: sezione A-B + Area neonatale: sezione A)
- 2) Attualmente lavoro principalmente nell'area neonatale (es., neonatologia con neonati malati o area di degenza con neonati fisiologici) (→Area materna: sezione A-B.)
- 3) Lavoro in entrambe le aree (materna e neonatale) (→ Sia area materna che area neonatale: sezioni A-B.)



## Area materna (Sezione A - B)

C. Per quanto riguarda l'**assistenza fornita alle donne con una gravidanza ed un travaglio fisiologico**, nell'area/dipartimento in cui lavori:

|                                                                                                                                                                                                                                                            | 1,<br>Sì | 2, Sì ma<br>necessita di<br>qualche<br>miglioramento | 3, No,<br>necessita di<br>miglioramenti<br>significativi |
|------------------------------------------------------------------------------------------------------------------------------------------------------------------------------------------------------------------------------------------------------------|----------|------------------------------------------------------|----------------------------------------------------------|
| A1. Sono presenti adeguate infrastrutture fisiche (es., acqua, elettricità, servizi igienici, aree di lavoro disponibili e logicamente progettate per mantenere la continuità delle cure ecc.)                                                             |          |                                                      |                                                          |
| A2. Vengono fornite attrezzature ed equipaggiamenti adeguati alla cura essenziale, in quantità sufficiente in ogni momento                                                                                                                                 |          |                                                      |                                                          |
| A3. Sono disponibili per tutto il personale linee guida o protocolli scritti e completi sulle procedure cliniche raccomandate per le donne con una gravidanza fisiologica, aggiornati sulla base delle più recenti evidenze (Evidence-Based Medicine, EBM) |          |                                                      |                                                          |
| A4. È organizzata un'efficace supervisione in servizio per migliorare le capacità pratiche personali, in modo concreto (es., il tutoraggio)                                                                                                                |          |                                                      |                                                          |

|                                                                                                                                                                         | 1,<br>Sì | 2, Sì ma<br>necessita di<br>qualche<br>miglioramento | 3, No,<br>necessita di<br>miglioramenti<br>significativi |
|-------------------------------------------------------------------------------------------------------------------------------------------------------------------------|----------|------------------------------------------------------|----------------------------------------------------------|
| A5. Hai partecipato ad almeno un evento formativo negli ultimi tre anni che fosse efficace e specifico per rafforzare le tue competenze rispetto...                     |          |                                                      |                                                          |
| A5.1 all'uso del partogramma?                                                                                                                                           |          |                                                      |                                                          |
| A5.2 al monitoraggio della frequenza cardiaca fetale (es., auscultazione intermittente della frequenza cardiaca fetale durante il travaglio e / o interpretazione CTG)? |          |                                                      |                                                          |
| A5.3 alle procedure da mettere in atto per ridurre i tagli cesarei non necessari (es., formazione sull'induzione del travaglio, indicazioni sul taglio cesareo)?        |          |                                                      |                                                          |

D. Per quanto riguarda le **emergenze ostetriche più gravi** (es., emorragia post-partum, eclampsia, distocia di spalla, arresto cardiovascolare in una donna incinta, ecc.) nell'area/dipartimento in cui lavori

|                                                                                                                                                                                                | 1,<br>Sì | 2, Sì ma<br>necessita di<br>qualche<br>miglioramento | 3, No,<br>necessita di<br>miglioramenti<br>significativi |
|------------------------------------------------------------------------------------------------------------------------------------------------------------------------------------------------|----------|------------------------------------------------------|----------------------------------------------------------|
| B1. Sono presenti adeguate infrastrutture fisiche (es., acqua, elettricità, servizi igienici, aree di lavoro disponibili e logicamente progettate per mantenere la continuità delle cure ecc.) |          |                                                      |                                                          |
| B2. Sono fornite attrezzature ed equipaggiamenti adeguati alla cura essenziale, in quantità sufficiente in ogni momento                                                                        |          |                                                      |                                                          |
| B3. Sono disponibili per tutto il personale linee guida o protocolli scritti e completi sulle procedure cliniche raccomandate per le                                                           |          |                                                      |                                                          |

|                                                                                                                                                                                              |  |  |  |
|----------------------------------------------------------------------------------------------------------------------------------------------------------------------------------------------|--|--|--|
| emergenze ostetriche più gravi, aggiornati sulla base delle più recenti evidenze (EBM)                                                                                                       |  |  |  |
| B4. È organizzata un'efficace supervisione in servizio per migliorare le capacità pratiche personali, in modo concreto (es., il tutoraggio)                                                  |  |  |  |
| B5. In caso di necessità, il sistema di trasferimento per le donne è funzionale a fornire un'assistenza con una qualità adeguata (cioè sicura, disponibile senza ritardi h24, 7 giorni su 7) |  |  |  |

|                                                                                                                                                                   |          |                                                      |                                                          |
|-------------------------------------------------------------------------------------------------------------------------------------------------------------------|----------|------------------------------------------------------|----------------------------------------------------------|
| B6. Hai partecipato ad almeno un evento formativo negli ultimi tre anni che fosse efficace e specifico per rafforzare le tue competenze rispetto alla gestione... | 1,<br>Sì | 2, Sì ma<br>necessita di<br>qualche<br>miglioramento | 3, No,<br>necessita di<br>miglioramenti<br>significativi |
| B6.1 dell'emorragia post-partum?                                                                                                                                  |          |                                                      |                                                          |
| B6.2 dell'eclampsia?                                                                                                                                              |          |                                                      |                                                          |
| B6.3 della distocia di spalla?                                                                                                                                    |          |                                                      |                                                          |
| B6.4 dell'arresto cardiaco in una donna incinta?                                                                                                                  |          |                                                      |                                                          |

## Area Neonatale (Sezione A - B)

A. Per quanto riguarda l'**assistenza fornita ai neonati fisiologici**, nell'area/dipartimento in cui lavori:

|                                                                                                                                                                                                                                    |          |                                                      |                                                          |
|------------------------------------------------------------------------------------------------------------------------------------------------------------------------------------------------------------------------------------|----------|------------------------------------------------------|----------------------------------------------------------|
|                                                                                                                                                                                                                                    | 1,<br>Sì | 2, Sì ma<br>necessita di<br>qualche<br>miglioramento | 3, No,<br>necessita di<br>miglioramenti<br>significativi |
| A1. Sono presenti adeguate infrastrutture fisiche (es., acqua, elettricità, servizi igienici, aree di lavoro disponibili e logicamente progettate per mantenere la continuità delle cure ecc.)                                     |          |                                                      |                                                          |
| A2. Sono fornite attrezzature ed equipaggiamenti adeguati alla cura essenziale, in quantità sufficiente in ogni momento                                                                                                            |          |                                                      |                                                          |
| A3. Sono disponibili per tutto il personale linee guida o protocolli scritti e completi sulle procedure cliniche raccomandate per il neonato sano, aggiornati sulla base delle più recenti evidenze (Evidence-Based Medicine, EBM) |          |                                                      |                                                          |
| A4. È organizzata un'efficace supervisione in servizio per migliorare le capacità pratiche personali, in modo concreto (es., il tutoraggio)                                                                                        |          |                                                      |                                                          |

|                                                                                                                                                     |          |                                                      |                                                          |
|-----------------------------------------------------------------------------------------------------------------------------------------------------|----------|------------------------------------------------------|----------------------------------------------------------|
| A5. Hai partecipato ad almeno un evento formativo negli ultimi tre anni che fosse efficace e specifico per rafforzare le tue competenze rispetto... | 1,<br>Sì | 2, Sì ma<br>necessita di<br>qualche<br>miglioramento | 3, No,<br>necessita di<br>miglioramenti<br>significativi |
| A5.1 la promozione, il supporto e ed il counseling per l'allattamento?                                                                              |          |                                                      |                                                          |
| A5.2 alla promozione del pelle a pelle e sulle procedure da mettere in atto per tenere al caldo il neonato?                                         |          |                                                      |                                                          |
| A5.3 alle precauzioni standard da mettere in atto durante l'assistenza ad un neonato fisiologico (es., cura                                         |          |                                                      |                                                          |

|                                                                           |  |  |  |
|---------------------------------------------------------------------------|--|--|--|
| del cordone ombelicale, vaccinazioni, valutazione dei segni di pericolo)? |  |  |  |
|---------------------------------------------------------------------------|--|--|--|

B. Per quanto riguarda le **emergenze neonatali più gravi** (es., presenza di meconio nel liquido amniotico, neonato pretermine o di basso peso alla nascita, sospetta sepsi neonatale ecc.), nell'area/dipartimento in cui lavori:

|                                                                                                                                                                                                                  | 1, Sì | 2, Sì ma necessita di qualche miglioramento | 3, No, necessita di miglioramenti significativi |
|------------------------------------------------------------------------------------------------------------------------------------------------------------------------------------------------------------------|-------|---------------------------------------------|-------------------------------------------------|
| B1. Sono presenti adeguate infrastrutture fisiche (es., acqua, elettricità, servizi igienici, aree di lavoro disponibili e logicamente progettate per mantenere la continuità delle cure ecc.)                   |       |                                             |                                                 |
| B2. Sono fornite attrezzature ed equipaggiamenti adeguati alla cura essenziale, in quantità sufficiente in ogni momento                                                                                          |       |                                             |                                                 |
| B3. Sono disponibili per tutto il personale linee guida o protocolli scritti e completi sulle procedure cliniche raccomandate per le emergenze neonatali, aggiornati sulla base delle più recenti evidenze (EBM) |       |                                             |                                                 |
| B4. È organizzata un'efficace supervisione in servizio per migliorare le capacità pratiche personali, in modo concreto (es., il tutoraggio)                                                                      |       |                                             |                                                 |
| B5. In caso di necessità, il sistema di trasferimento per i neonati è funzionale a fornire un'assistenza con una qualità adeguata (cioè sicura, disponibile senza ritardi h24, 7 giorni su 7)                    |       |                                             |                                                 |

|                                                                                                                                                                                                    | 1, Sì | 2, Sì ma necessita di qualche miglioramento | 3, No, necessita di miglioramenti significativi |
|----------------------------------------------------------------------------------------------------------------------------------------------------------------------------------------------------|-------|---------------------------------------------|-------------------------------------------------|
| B6. Hai partecipato ad almeno un evento formativo negli ultimi tre anni che fosse efficace e specifico per rafforzare le tue competenze rispetto alla gestione...<br>della rianimazione neonatale? |       |                                             |                                                 |

**Nota:** ci sono domande diverse per i 3 percorsi possibili: ostetriche che lavorano in area materno / neonatale, operatori sanitari dell'area materna e operatori sanitari dell'area neonatale.

Per gli operatori sanitari **dell'area materna:**

**Q1. Hai qualche suggerimento e / o commento per migliorare l'assistenza fornita alle donne con una gravidanza ed un travaglio fisiologico e/o per migliorare la gestione delle emergenze ostetriche più gravi e/o per migliorare l'assistenza fornita ai neonati fisiologici?**

Per gli operatori sanitari **dell'area neonatale:**

**Q1. Hai qualche suggerimento e/o commento per migliorare l'assistenza fornita ai neonati fisiologici e/o per migliorare la gestione delle emergenze neonatali più gravi?**

Per le ostetriche che lavorano **sia in area materna che in area neonatale:**

**Q1. Hai qualche suggerimento e / o commento per migliorare l'assistenza fornita alle donne con una gravidanza ed un travaglio fisiologico e/o per migliorare la gestione delle emergenze ostetriche più gravi e/o per migliorare l'assistenza fornita ai neonati fisiologici e/o per migliorare la gestione delle emergenze neonatali più gravi?**

|  |
|--|
|  |
|--|

## Sezione C. Organizzazione del lavoro, gestione dei dati e comunicazione.

Per quanto riguarda l'**organizzazione** del lavoro, nell'area/dipartimento in cui lavori

|                                                                                                                                                             | 1, Sì | 2, Sì ma necessita di qualche miglioramento | 3, No, necessita di miglioramenti significativi |
|-------------------------------------------------------------------------------------------------------------------------------------------------------------|-------|---------------------------------------------|-------------------------------------------------|
| C1. Il numero di operatori sanitari è sufficiente a garantire un'assistenza adeguata                                                                        |       |                                             |                                                 |
| C2. I ruoli e le responsabilità di ogni operatore sanitario sono scritti in modo chiaro e definiti in modo esaustivo                                        |       |                                             |                                                 |
| C3. Il passaggio delle consegne avviene in modo efficace e completo durante i turni di lavoro, rispettando e proteggendo la riservatezza delle informazioni |       |                                             |                                                 |

Per quanto riguarda **la raccolta e l'utilizzo dei dati**, nell'area/dipartimento in cui lavori:

|                                                                                                                                                                                                                                                                                                                                                                              | 1, Sì | 2, Sì ma necessita di qualche miglioramento | 3, No, necessita di miglioramenti significativi |
|------------------------------------------------------------------------------------------------------------------------------------------------------------------------------------------------------------------------------------------------------------------------------------------------------------------------------------------------------------------------------|-------|---------------------------------------------|-------------------------------------------------|
| C4. Esiste un sistema di raccolta dei dati clinici (es., un registro scritto o informatico) che è completo, accurato, affidabile e facile da consultare                                                                                                                                                                                                                      |       |                                             |                                                 |
| C5. Esiste un elenco di indicatori pre-identificati della qualità delle cure (es., il tasso delle seguenti pratiche: taglio cesareo con classificazione Robson, episiotomie, Kristeller, induzioni, allattamento alla dimissione, pelle a pelle, kangaroo care, ecc.), utilizzati per compilare rapporti statistici da condividere e discutere regolarmente tra il personale |       |                                             |                                                 |

Per quanto riguarda **la comunicazione**, nell'area/dipartimento in cui lavori:

|                                                                                                                                                                                        | 1, Sì | 2, Sì ma necessita di qualche miglioramento | 3, No, necessita di miglioramenti significativi |
|----------------------------------------------------------------------------------------------------------------------------------------------------------------------------------------|-------|---------------------------------------------|-------------------------------------------------|
| C6. In generale, gli operatori sanitari hanno una comunicazione efficace con le donne e le famiglie (es., assicurandosi che comprendano e/o dando la possibilità di porre domande e di |       |                                             |                                                 |

|                                                                                                                                                                                                                                                           |  |  |  |
|-----------------------------------------------------------------------------------------------------------------------------------------------------------------------------------------------------------------------------------------------------------|--|--|--|
| esprimere liberamente le proprie opinioni) utilizzando un linguaggio semplice e culturalmente accettabile                                                                                                                                                 |  |  |  |
| C7. Alle donne e alle loro famiglie viene fornito un chiaro materiale educativo relativo alla salute della madre e del neonato, in forma accessibile (scritta, digitale o pittorica), disponibile in tutte le lingue delle comunità servite dall'ospedale |  |  |  |
| C8. Hai partecipato a efficaci eventi di formazione per rafforzare le tue specifiche competenze in materia di comunicazione e consulenza interpersonale (almeno un evento di formazione negli ultimi tre anni)                                            |  |  |  |

Q2. Hai qualche suggerimento e /o commento per **migliorare l'organizzazione del lavoro e/o la raccolta e l'uso dei dati o per migliorare la comunicazione?**

|  |
|--|
|  |
|--|

## Sezione D. Qualità delle cure e delle pratiche effettuate.

Per quanto riguarda il **supporto emotivo, psicologico e decisionale fornito alle donne**, nell'area/dipartimento in cui lavori:

|                                                                                                                                                                                                                                                                                                                                                                                                                                | 1,<br>Sì | 2, Sì ma<br>necessita di<br>qualche<br>miglioramento | 3, No,<br>necessita di<br>miglioramenti<br>significativi |
|--------------------------------------------------------------------------------------------------------------------------------------------------------------------------------------------------------------------------------------------------------------------------------------------------------------------------------------------------------------------------------------------------------------------------------|----------|------------------------------------------------------|----------------------------------------------------------|
| D1. È garantita la possibilità per tutte le donne di avere un accompagnatore di fiducia per tutto il tempo che lo ritengono necessario (cioè durante tutte le fasi del travaglio, del parto e del periodo post-partum)                                                                                                                                                                                                         |          |                                                      |                                                          |
| D2. Hai partecipato ad eventi di formazione efficaci per rafforzare specifiche competenze nel fornire supporto emotivo alle donne e nel potenziare le loro capacità durante il periodo del parto e/o post-partum (es., comprendendo le influenze dello stato emotivo sul rilascio di ossitocina e insegnando metodi pratici per gestire efficacemente le emozioni ecc.) (almeno un evento di formazione negli ultimi tre anni) |          |                                                      |                                                          |

Per quanto riguarda la **tutela della privacy delle donne**, nell'area/dipartimento in cui lavori:

|                                                                                                                                                                                                                                                           | 1,<br>Sì | 2, Sì ma<br>necessita di<br>qualche<br>miglioramento | 3, No,<br>necessita di<br>miglioramenti<br>significativi |
|-----------------------------------------------------------------------------------------------------------------------------------------------------------------------------------------------------------------------------------------------------------|----------|------------------------------------------------------|----------------------------------------------------------|
| D3. Sono disponibili infrastrutture adeguate a garantire la privacy delle donne e delle loro famiglie (es., stanze private per le visite, disponibilità di tende o divisori tra i letti d'ospedale, numero adeguato di letti d'ospedale per stanza, ecc.) |          |                                                      |                                                          |
| D4. Vengono attuate tutte le misure necessarie per garantire la privacy e la riservatezza delle donne e delle loro famiglie (es., le                                                                                                                      |          |                                                      |                                                          |

|                                                                                        |  |  |  |
|----------------------------------------------------------------------------------------|--|--|--|
| informazioni private vengono discusse in modo che gli altri non possano sentire, ecc.) |  |  |  |
|----------------------------------------------------------------------------------------|--|--|--|

Q3. Hai qualche suggerimento e / o commento per **migliorare il supporto emotivo, psicologico e decisionale** fornito alle donne e/o la **protezione della privacy** delle donne nell'area/dipartimento in cui lavori?

|  |
|--|
|  |
|--|

**Nota:** esistono due diverse versioni della domanda D5.1 per i tre possibili percorsi del questionario; le ostetriche che lavorano sia nell'area materna che neonatale dovrebbero rispondere a entrambe le versioni.

Per quanto riguarda il **diritto delle donne ad una scelta informata**, nell'area/dipartimento in cui lavori:

Per gli operatori sanitari che lavorano in **area materna**:

|                                                                                                                                                                                                                  |       |                                             |                                                 |
|------------------------------------------------------------------------------------------------------------------------------------------------------------------------------------------------------------------|-------|---------------------------------------------|-------------------------------------------------|
| D5.1. Esiste materiale scritto/digitale che supporti gli operatori sanitari e descriva in modo esauriente i rischi e i benefici delle seguenti procedure, con l'obiettivo di informare meglio le donne rispetto: | 1, Sì | 2, Sì ma necessita di qualche miglioramento | 3, No, necessita di miglioramenti significativi |
| a) al taglio cesareo                                                                                                                                                                                             |       |                                             |                                                 |
| b) all'induzione al travaglio di parto                                                                                                                                                                           |       |                                             |                                                 |

Per gli operatori sanitari che lavorano in **area neonatale**:

|                                                                                                                                                                                                                  |       |                                             |                                                 |
|------------------------------------------------------------------------------------------------------------------------------------------------------------------------------------------------------------------|-------|---------------------------------------------|-------------------------------------------------|
| D5.1. Esiste materiale scritto/digitale che supporti gli operatori sanitari e descriva in modo esauriente i rischi e i benefici delle seguenti procedure, con l'obiettivo di informare meglio le donne rispetto: | 1, Sì | 2, Sì ma necessita di qualche miglioramento | 3, No, necessita di miglioramenti significativi |
| a) alla somministrazione della Vitamina K                                                                                                                                                                        |       |                                             |                                                 |
| b) all'oftalmo profilassi                                                                                                                                                                                        |       |                                             |                                                 |

Per quanto riguarda il **diritto delle donne ad una scelta informata**, nell'area/dipartimento in cui lavori:

|                                                                                                                                                                                                                              |       |                                             |                                                 |
|------------------------------------------------------------------------------------------------------------------------------------------------------------------------------------------------------------------------------|-------|---------------------------------------------|-------------------------------------------------|
|                                                                                                                                                                                                                              | 1, Sì | 2, Sì ma necessita di qualche miglioramento | 3, No, necessita di miglioramenti significativi |
| D5.2. Ci sono regolari sessioni di orientamento a disposizione delle donne durante la gravidanza con l'obiettivo di informare meglio le donne per le procedure che richiedono il consenso                                    |       |                                             |                                                 |
| D6. Hai partecipato a efficaci eventi di formazione su come informare adeguatamente le donne e favorire una scelta informata sulle procedure chiave relative al parto (almeno un evento di formazione negli ultimi tre anni) |       |                                             |                                                 |

Considerando **altri aspetti della qualità dell'assistenza**, nell'area/dipartimento in cui lavori:

|  |       |                               |                     |
|--|-------|-------------------------------|---------------------|
|  | 1, Sì | 2, Sì ma necessita di qualche | 3, No, necessita di |
|--|-------|-------------------------------|---------------------|

|                                                                                                                                                                                                                                                               |  | miglioramento | miglioramenti significativi |
|---------------------------------------------------------------------------------------------------------------------------------------------------------------------------------------------------------------------------------------------------------------|--|---------------|-----------------------------|
| D7. Nel tuo reparto/unità c'è un gruppo dedicato al miglioramento della qualità dell'assistenza e lavora in modo efficace                                                                                                                                     |  |               |                             |
| D8. Vengono organizzati incontri, almeno una volta alla settimana, per discutere i casi clinici più rilevanti con tutti gli operatori sanitari coinvolti nell'assistenza                                                                                      |  |               |                             |
| D9. In caso di morte materna e/o neonatale, vengono organizzati incontri /audit aperti e costruttivi, con tutti gli operatori sanitari coinvolti nell'assistenza, per analizzare il caso e concordare azioni per migliorare la qualità dell'assistenza        |  |               |                             |
| D10. Hai partecipato ad efficaci e specifici eventi di formazione sui diritti delle donne e dei neonati durante la degenza ospedaliera (almeno un evento di formazione negli ultimi tre anni)                                                                 |  |               |                             |
| D11. Hai partecipato a efficaci e specifici eventi formativi sulle pratiche per la gestione del dolore nelle donne (farmacologico e non farmacologico) e/o sulla prevenzione/gestione del dolore neonatale (almeno un evento formativo negli ultimi tre anni) |  |               |                             |

Q4. Hai qualche suggerimento e / o commento per migliorare i diritti delle donne rispetto alla scelta informata e/o per **migliorare altri aspetti della qualità dell'assistenza?**

|  |
|--|
|  |
|--|

## Sezione E. COVID-19: preparazione e risposta

Fin dall'inizio della pandemia COVID-19, qual è stato il **livello di preparazione e di risposta** nell'area/dipartimento in cui lavori, rispetto...

|                                                                                                                                                                                                                                            | 1, Esistente e/o adeguato dall'inizio della pandemia | 2, Non sempre esistente e/o non del tutto adeguato (es., mancante nelle prime fasi della pandemia) | 3, Mai esistita e/o mai adeguata dall'inizio della pandemia fino ad oggi |
|--------------------------------------------------------------------------------------------------------------------------------------------------------------------------------------------------------------------------------------------|------------------------------------------------------|----------------------------------------------------------------------------------------------------|--------------------------------------------------------------------------|
| E1. All'istituzione di un percorso dedicato alle donne con sospetto/accertato COVID-19 dal momento del loro ingresso in ospedale, per ridurre il rischio di infezione                                                                      |                                                      |                                                                                                    |                                                                          |
| E2. Alla regolare distribuzione, in numero sufficiente di dispositivi di protezione individuale (ad es., maschere, guanti, camici) per gli operatori sanitari                                                                              |                                                      |                                                                                                    |                                                                          |
| E3. Alla disposizione di un numero adeguato di stazioni per l'igiene delle mani (dotate di acqua, sapone, carta assorbente o soluzione alcolica) funzionanti e accessibili a tutti gli operatori sanitari, alle donne e alle loro famiglie |                                                      |                                                                                                    |                                                                          |
| E4. Alla disponibilità di linee guida, chiare e aggiornate sulla base delle raccomandazioni                                                                                                                                                |                                                      |                                                                                                    |                                                                          |

|                                                                                                                                                                                                                                                                                       |  |  |  |
|---------------------------------------------------------------------------------------------------------------------------------------------------------------------------------------------------------------------------------------------------------------------------------------|--|--|--|
| internazionali (es., OMS, FIGO, NICE, RCOG ecc.) specifiche per l'assistenza alle donne e/o ai neonati per tutti gli operatori sanitari                                                                                                                                               |  |  |  |
| E5. Alla disponibilità di attrezzature ed equipaggiamenti per i test diagnostici per il COVID-19 (cioè tamponi nasofaringei e reagenti) in quantità sufficiente per tutti i casi sospetti sia tra le donne/neonati che tra gli operatori sanitari                                     |  |  |  |
| E6. All'accessibilità, per tutti gli operatori sanitari, ad una formazione adeguata agli operatori sanitari che copre i bisogni fondamentali imposti dalla pandemia COVID-19 (ad es. prevenzione delle trasmissioni, uso appropriato dei dispositivi di protezione individuale, ecc.) |  |  |  |

Dall'inizio della pandemia COVID-19, si è mai verificata la seguente situazione, nell'area/dipartimento in cui lavori?

|                                                                                                                                                                                                | 1, Mai successo | 2, È accaduto solo in alcune fasi cruciali della pandemia COVID-19 (es., all'inizio della pandemia) | 3, È successo indipendentemente dalla pandemia COVID-19 |
|------------------------------------------------------------------------------------------------------------------------------------------------------------------------------------------------|-----------------|-----------------------------------------------------------------------------------------------------|---------------------------------------------------------|
| E7. Chiusura di reparti di maternità e/o riduzione delle prestazioni di routine (ad es., visite ambulatoriali, ecografie, assistenza diurna) e/o riduzione dei posti letto per donne o neonati |                 |                                                                                                     |                                                         |
| E8. Numero insufficiente di operatori sanitari per fornire le cure materno-neonatali essenziali                                                                                                |                 |                                                                                                     |                                                         |
| E9. Silenziamento (censura) del personale per evitare di segnalare procedure cliniche e/o amministrative inadeguate                                                                            |                 |                                                                                                     |                                                         |

E10. Dall'inizio della pandemia COVID-19, si è mai verificata una delle altre seguenti situazioni nell'area/dipartimento in cui lavori?

|                                                                                                                                                                                 | 1, Mai successo | 2, È accaduto solo in alcune fasi cruciali della pandemia COVID-19 (es., all'inizio della pandemia) | 3, È successo indipendentemente dalla pandemia COVID-19 |
|---------------------------------------------------------------------------------------------------------------------------------------------------------------------------------|-----------------|-----------------------------------------------------------------------------------------------------|---------------------------------------------------------|
| E10a. Aumento della medicalizzazione del processo di parto (cioè uso inappropriato dell'ossitocina, aumento del tasso di episiotomie, parto operativo e/o taglio cesareo, ecc.) |                 |                                                                                                     |                                                         |
| E10b. Restrizioni nella presenza della persona di fiducia della donna durante il                                                                                                |                 |                                                                                                     |                                                         |



|                                                                                                                                                                                                                                                                                                                              |  |  |  |
|------------------------------------------------------------------------------------------------------------------------------------------------------------------------------------------------------------------------------------------------------------------------------------------------------------------------------|--|--|--|
| travaglio/parto/post parto, in assenza di chiare indicazioni cliniche                                                                                                                                                                                                                                                        |  |  |  |
| E10c. Limitazioni della libertà di movimento durante il travaglio, in assenza di chiare indicazioni cliniche                                                                                                                                                                                                                 |  |  |  |
| E10d. Limitazioni nelle procedure per la gestione del dolore (farmacologico e non farmacologico) alle donne che lo richiedevano, durante tutte le fasi del travaglio                                                                                                                                                         |  |  |  |
| E10e. Limitazioni dell'rooming-in, in assenza di chiare indicazioni cliniche                                                                                                                                                                                                                                                 |  |  |  |
| E10f. Limitazioni nell'allattamento, in assenza di chiare indicazioni cliniche (si prega di notare: le linee guida internazionali attualmente non indicano la positività al COVID-19 senza malattia grave come chiara indicazione clinica per limitare l'allattamento)                                                       |  |  |  |
| E10g. Limitazioni nel contatto pelle a pelle nella prima ora dopo il parto, in assenza di chiare indicazioni cliniche (si prega di notare: le linee guida internazionali attualmente non indicano la positività al COVID-19 senza malattia grave come una chiara indicazione clinica per limitare il contatto pelle a pelle) |  |  |  |

Q5. Hai dei suggerimenti e / o commenti per migliorare il **livello di preparazione e di risposta nell'area / dipartimento** in cui lavori durante la pandemia COVID-19?

|  |
|--|
|  |
|--|

## Sezione F. Considerazioni finali

F1. Nel complesso, ritieni che l'area/dipartimento in cui lavori abbia risposto adeguatamente alla pandemia COVID-19?

- 1) Sì, la risposta è stata adeguata
- 2) Sì, ma la risposta deve essere migliorata
- 3) No, la risposta deve essere migliorata in modo significativo

F2. I tuoi livelli di stress-lavoro correlati sono cambiati durante la pandemia COVID-19?

- 1) Significativamente aumentati
- 2) Leggermente aumentati
- 3) Non sono cambiati
- 4) Leggermente diminuiti
- 5) Diminuiti in modo significativo

F3. Nel complesso, dall'inizio della pandemia fino ad oggi, quanto sei soddisfatto del tuo lavoro?

|                        |                  |             |                |                      |
|------------------------|------------------|-------------|----------------|----------------------|
| 1- molto insoddisfatto | 2- insoddisfatto | 3- neutrale | 4- soddisfatto | 5- molto soddisfatto |
|------------------------|------------------|-------------|----------------|----------------------|

## Sezione G. Dati socio-demografici

G1. Da quanti anni lavori nel settore materno-neonatale?

- 1) Meno di 5 anni
- 2) Tra i 5 e i 10 anni
- 3) Più di 10 anni

G2. In quale Paese lavori? (Per favore seleziona un paese)

Elenco di 53 paesi nella regione europea dell'OMS.

Se l'HW ha risposto dai seguenti paesi sarà disponibile un'ulteriore domanda per specificare la regione di provenienza: Bosnia, Croazia, Francia, Germania, Italia, Norvegia, Portogallo, Romania, Serbia, Spagna, Svezia, Regno Unito.

**G2a. La ricerca è esclusiva della regione europea dell'OMS, che comprende 53 paesi, coprendo una vasta regione geografica dall'Atlantico al Pacifico.**

Se non riesci a trovare il tuo paese nell'elenco, da dove vieni? Per favore specificacelo.

**G2fvg. In che ospedale lavori?**

Ricordiamo che il questionario è anonimo: per noi è importante rispettare la tua privacy.

Questa informazione sarà utilizzata in modo aggregato per effettuare analisi di sottogruppo pertanto le tue risposte non potranno essere collegate al tuo nome o ruolo professionale.

- 1) IRCCS Burlo Garofolo, Trieste
- 2) Ospedale Santa Maria della Misericordia, Udine
- 3) Ospedale San Polo, Monfalcone
- 4) Ospedale di Latisana, Udine
- 5) Ospedale Santa Maria degli Angeli, Pordenone
- 6) Ospedale di San Vito al Tagliamento, Pordenone
- 7) Policlinico San Giorgio, Pordenone
- 8) Ospedale di Sant' Antonio, San Daniele del Friuli
- 9) Ospedale di Sant' Antonio Abate, Tolmezzo

G3. Quanti anni hai?

- 1) 20-29
- 2) 30-39
- 3) 40-49
- 4) 50-59
- 5) 60-69
- 6) >=70

G4. Come descriveresti il tuo genere?

- 1) Uomo
- 2) Donna
- 3) Preferisco auto-descriverti come non binario / gender-fluid / agender
- 4) Altro
- 5) Preferisco non rispondere

**G5. Data di compilazione del sondaggio (giorno-mese-anno):**

Ci aiuterà a interpretare i risultati alla luce delle diverse fasi della pandemia COVID-19 in ogni Paese.

**G6. Vorresti ricevere via e-mail i risultati di questo studio una volta terminato?**

I dati saranno trattati secondo le linee guida per il trattamento dei dati personali e il tuo indirizzo email non sarà diffuso in nessuna fase né condiviso con altri.

- 1) Sì (→G6a)
- 2) No

**G6a. Il tuo indirizzo email non verrà in alcun modo collegato alle risposte di questo sondaggio.**

Fornisco il mio contatto email in questo modulo ai sensi e per gli effetti degli artt. 13 e 14 del Regolamento (UE) 2016/679 del Parlamento Europeo relativo al trattamento dei dati personali secondo le modalità e nei limiti di quanto riportato nel citato regolamento.

"Fornisco volontariamente il mio contatto email per ricevere i risultati di questo sondaggio una volta terminato"

[spazio inserimento e-mail]

**G7. Come hai saputo di questa indagine? Scegliere tutte le opzioni pertinenti** Internet search (e.g., Google)

- 1) Social media (Facebook / Instagram)
- 2) Ricerca in Internet (es., Google)
- 3) E-mail ricevuta da un amico / collega / sul lavoro
- 4) Passaparola
- 5) Attraverso la stampa (es., radio, stampa, TV)
- 6) Altro

**Q6. Ti preghiamo di condividere con noi dei suggerimenti per migliorare la qualità dell'assistenza materna e neonatale fornita nell'area / dipartimento in cui lavori e / o per migliorare questa indagine.**

Premendo il pulsante "invia" qui sotto, invierai le tue risposte.

Se desideri contattare il team di ricerca nel tuo Paese, scarica il file sottostante.

**Il questionario è finito: grazie per averci dedicato del tempo.**

**Le auguriamo una buona giornata!**

## Supplementary Table 9. Final health workers' IMAGiNE questionnaire in Portuguese

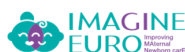

Projeto Internacional

# IMAGiNE EURO

( Melhorar os cuidados de saúde materno-infantis na Região Europeia da WHO)

*Questionário online sobre preparação, qualidade e resiliência dos serviços de saúde materno-infantis nos países da Região Europeia da OMS durante a pandemia COVID-19*

*O questionário é baseado nos Standards da OMS para melhorar a qualidade dos cuidados de saúde materno-infantis nas unidades de saúde hospitalares.*

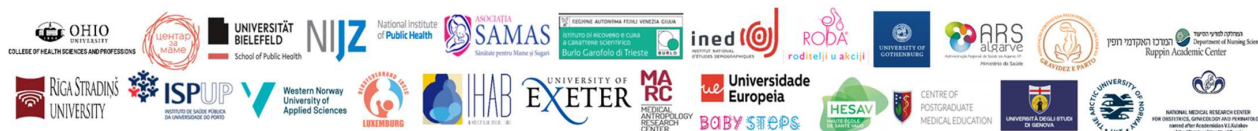

## É um médico ou um enfermeiro a prestar cuidados de saúde maternos ou neonatais em contexto hospitalar, durante a pandemia de COVID 19?

### Participe neste estudo: a sua opinião é importante

A sua participação é voluntária: Irá demorar aproximadamente **15 minutos**.

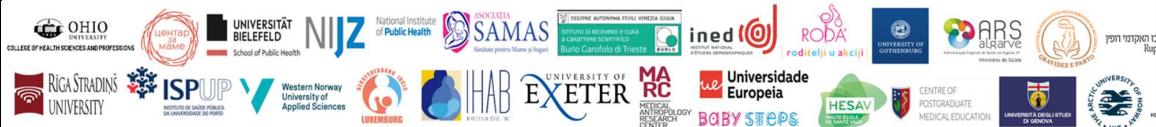

O questionário é baseado nos Standards da OMS para melhorar a qualidade dos cuidados de saúde maternos ao recém nascido em unidades de saúde.

**Observação:** este estudo é exclusivamente dedicado a médicos de medicina geral e familiar que atualmente trabalham em atendimento hospitalar materno / neonatal, parteiras, enfermeiras, pediatras a trabalhar em neonatologia ou neonatologistas, obstetras e ginecologistas e médicos internos de obstetrícia e ginecologia ou de neonatologia.

**Estamos comprometidos com a sua privacidade. Para compreender mais sobre o estudo, o processamento e tratamento dos dados recolhidos, por favor leia o Consentimento Informado e a Política de Privacidade disponíveis para download no link abaixo.**

Observação: este estudo é exclusivamente dedicado a médicos de medicina geral e familiar que atualmente trabalham em atendimento hospitalar materno / neonatal, parteiras, enfermeiras, pediatras a trabalhar em neonatologia ou neonatologistas, obstetras e ginecologistas e médicos internos de obstetrícia e ginecologia ou de neonatologia.

Se não se reconhece como um dos profissionais de saúde listados acima, por favor, economize seu tempo e feche o link.

De qualquer forma, agradecemos muito o seu interesse no nosso estudo.

Se conhece alguém que pode participar, compartilhe o link com essa pessoa.

Mais uma vez, obrigado pelo seu tempo.

**Ao dar o seu consentimento na pergunta seguinte, decide participar voluntariamente no questionário.**

#### CONSENTIMENTO DE PARTICIPAÇÃO /INFORMADO:

**Li e compreendi o formulário de consentimento na página anterior e, ao selecionar "Sim" abaixo, indico a minha vontade de participar voluntariamente no estudo.**

- 1) Sim (→S1)
- 2) Não (o questionário não pode ser preenchido→uma mensagem estará disponível para agradecer o interesse)

**Se NÃO:** Se conhece alguém que gostasse de participar, por favor partilhe o link com essa(s) pessoa(s). Obrigado pelo seu tempo! Desejamos-lhe um ótimo dia!

**SCREENING QUESTIONS:**

**S1. É um médico ou enfermeiro, a prestar cuidados de saúde maternos ou neonatais (no parto e/ ou pós parto), em contexto hospitalar, há mais de um ano?**

- 1) Sim (→S2)
- 2) Não (o questionário não pode ser preenchido→uma mensagem estará disponível para agradecer o interesse)

**Se NÃO:** Obrigada pelo seu interesse na nossa investigação. Para participar é necessário ter estado envolvido diretamente nos cuidados de saúde maternos ou neonatais numa unidade de saúde hospitalar há mais de 1 ano.

Se conhece alguém que esteve nessa situação, por favor partilhe o link com essa(s) pessoa(s). Obrigada pelo seu tempo! Desejamos-lhe um ótimo dia!

**S2. Esteve diretamente envolvido em cuidados de saúde maternos ou neonatais (no parto e/ ou pós parto) numa unidade de saúde hospitalar desde o dia 1 de Março de 2020?**

- 1) Sim (→ S3)
- 2) Não (O questionário não pode ser preenchido→uma mensagem estará disponível para agradecer o interesse)

**Se NÃO:** Obrigada pelo seu interesse na nossa investigação. Para participar é necessário ter estado envolvido diretamente nos cuidados de saúde maternos ou neonatais, em contexto hospitalar, pelo menos desde o dia 1 de março de 2020. Se conhece alguém nesta situação, por favor partilhe o link com essa(s) pessoa(s). Obrigada pelo seu tempo! Desejamos-lhe um bom dia!

**S3. Tipo de unidade hospitalar materna ou neonatal para a qual trabalha:**

**Nota:** se trabalha em mais do que uma unidade hospitalar materna ou neonatal, por favor seleccione aquela em que irá pensar, enquanto estiver a responder às perguntas do questionário

- 1) Hospital ou maternidade pública
- 2) Hospital ou clínica privada

**S4. Qual é a sua qualificação profissional?**

- 1) Médico de medicina geral e familiar a trabalhar atualmente na assistência materna (→secção A-B)
- 2) Médico de medicina geral e familiar a trabalhar atualmente em cuidado neonatal (→secção C-D)
- 3) Enfermeira especialista em Saúde Materna e Obstetrícia (Parteira) (→secção A-B)
- 4) Enfermeira a prestar cuidados de saúde materna (→secção A-B)
- 5) Enfermeira a prestar cuidados de saúde neonatais (pós-parto, berçário ou UCIN) (→secção C-D)
- 6) Médico pediatra a trabalhar em neonatologia ou neonatologista (→secção C-D)
- 7) Médico obstetra/ginecologista (→secção A-B)
- 8) Médico interno em obstetrícia e ginecologia (→secção A-B)
- 9) Médico interno em neonatologia (→secção C-D)

**S4a. Em que área trabalha principalmente?**

- 1) Atualmente trabalho principalmente na área materna (por exemplo, enfermaria de parto, sala de parto)
- 2) Atualmente trabalho principalmente na área neonatal (por exemplo, enfermaria neonatal para bebés que estão doentes ou enfermarias pós-natal com recém-nascidos saudáveis)
- 3) Trabalho nas duas áreas (materna e neonatal)

## Área maternal (Seção A-B)

- E. No que diz respeito aos cuidados de saúde à **mulher grávida** saudável, em trabalho de parto espontâneo, na unidade/departamento onde trabalha:

|                                                                                                                                                                                                                                                        | 1)<br>Sim | 2) Sim, mas<br>necessita<br>de algumas<br>melhorias | 3) Não,<br>necessita de<br>melhorias<br>significativas |
|--------------------------------------------------------------------------------------------------------------------------------------------------------------------------------------------------------------------------------------------------------|-----------|-----------------------------------------------------|--------------------------------------------------------|
| A1. Estão presentes infraestruturas físicas adequadas (por exemplo, água, eletricidade, saneamento, áreas específicas para trabalho de parto estão disponíveis logicamente concebidas para manter a continuidade dos cuidados)                         |           |                                                     |                                                        |
| A2 São fornecidos equipamentos e materiais adequados para a prestação de cuidados essenciais e em quantidades suficientes, em todos os momentos.                                                                                                       |           |                                                     |                                                        |
| A3. Estão disponíveis para todos os funcionários diretrizes ou protocolos escritos sobre procedimentos clínicos recomendados para mulheres grávidas saudáveis, atualizados com base nas evidências mais recentes (Medicina Baseada na Evidência, MBE). |           |                                                     |                                                        |
| A4. É organizada no serviço uma supervisão de suporte eficaz para melhorar as competências práticas pessoais (ou seja, tutoria)                                                                                                                        |           |                                                     |                                                        |

|                                                                                                                                                                                  |           |                                                     |                                                        |
|----------------------------------------------------------------------------------------------------------------------------------------------------------------------------------|-----------|-----------------------------------------------------|--------------------------------------------------------|
| A5. Participou (pelo menos uma formação nos últimos três anos) em formações especializadas e eficazes para melhorar as suas competências...                                      | 1)<br>Sim | 2) Sim, mas<br>necessita<br>de algumas<br>melhorias | 3) Não,<br>necessita de<br>melhorias<br>significativas |
| A5.1 no uso de partograma?                                                                                                                                                       |           |                                                     |                                                        |
| A5.2 na monitorização da frequência cardíaca fetal (por exemplo, auscultação intermitente da frequência cardíaca fetal durante o trabalho de parto e / ou interpretação do CTG)? |           |                                                     |                                                        |
| A5.3 em como reduzir cesarianas desnecessárias (por exemplo, formação em indução de trabalho de parto ou em indicação para cesariana)?                                           |           |                                                     |                                                        |

- F. Em relação às **emergências obstétricas mais graves** (por exemplo, hemorragia pós-parto, eclâmpsia, distocia de ombro, paragem cardiovascular em mulheres grávidas, etc.) na área/departamento materno e neonatal onde trabalha:

|                                                                                                                                                                                                                                                           | 1)<br>Sim | 2) Sim, mas<br>necessita<br>de algumas<br>melhorias | 3) Não,<br>necessita de<br>melhorias<br>significativas |
|-----------------------------------------------------------------------------------------------------------------------------------------------------------------------------------------------------------------------------------------------------------|-----------|-----------------------------------------------------|--------------------------------------------------------|
| B1. Estão presentes infraestruturas físicas adequadas (por exemplo, água, eletricidade, saneamento, áreas para procedimento urgentes estão disponíveis e logicamente concebidas para fornecer os cuidados essenciais)                                     |           |                                                     |                                                        |
| B2. São fornecidos equipamentos e materiais adequados para a prestação de cuidados essenciais e em quantidades suficientes, em todos os momentos.                                                                                                         |           |                                                     |                                                        |
| B3. Estão disponíveis para todos os funcionários diretrizes ou protocolos escritos sobre procedimentos clínicos recomendados para emergências obstétricas graves, atualizados com base nas evidências mais recentes (Medicina Baseada na Evidência, MBE). |           |                                                     |                                                        |

|                                                                                                                                                                           |           |                                            |                                               |
|---------------------------------------------------------------------------------------------------------------------------------------------------------------------------|-----------|--------------------------------------------|-----------------------------------------------|
| B4. O serviço disponibiliza práticas de supervisão de apoio no sentido da melhoria das competências práticas individuais (por exemplo, tutoria ou mentoring).             |           |                                            |                                               |
| B5. Quando necessário, o sistema de encaminhamento e transporte é funcional e oferece cuidados de qualidade adequada (isto é, seguro, disponível, sem demora, 24h/7 dias) |           |                                            |                                               |
| B6. Participou (pelo menos uma formação nos últimos três anos) em formações especializadas e eficazes para melhorar as suas competências...                               | 1)<br>Sim | 2) Sim, mas necessita de algumas melhorias | 3) Não, necessita de melhorias significativas |
| B6.1 para lidar com a hemorragia pós-parto?                                                                                                                               |           |                                            |                                               |
| B6.2 para lidar com a eclâmpsia?                                                                                                                                          |           |                                            |                                               |
| B6.3 para lidar com a distócia de ombro?                                                                                                                                  |           |                                            |                                               |
| B6.4 para lidar com situações de paragem cardiovascular em mulheres grávidas?                                                                                             |           |                                            |                                               |

## Área neonatal (Seção A-B)

A. No que diz respeito ao cuidado de **recém-nascidos sem complicações**, na unidade/departamento onde trabalha:

|                                                                                                                                                                                                                                                     |           |                                            |                                               |
|-----------------------------------------------------------------------------------------------------------------------------------------------------------------------------------------------------------------------------------------------------|-----------|--------------------------------------------|-----------------------------------------------|
|                                                                                                                                                                                                                                                     | 1)<br>Sim | 2) Sim, mas necessita de algumas melhorias | 3) Não, necessita de melhorias significativas |
| A1. Estão presentes infraestruturas físicas adequadas (por exemplo, água, eletricidade, saneamento, áreas específicas para recém-nascidos saudáveis estão disponíveis e logicamente concebidas para manter a continuidade dos cuidados)             |           |                                            |                                               |
| A2. São fornecidos equipamentos e materiais adequados para a prestação de cuidados essenciais, em quantidades suficientes, em todos os momentos.                                                                                                    |           |                                            |                                               |
| A3. Estão disponíveis para todos os funcionários diretores ou protocolos escritos, sobre procedimentos clínicos recomendados para o recém-nascido saudável, atualizados com base nas evidências mais recentes (Medicina Baseada na Evidência, MBE). |           |                                            |                                               |
| A4. O serviço disponibiliza práticas de <b>supervisão de apoio</b> no sentido da melhoria das competências técnicas individuais (por exemplo, tutoria ou mentoring).                                                                                |           |                                            |                                               |
| A5. Participou (pelo menos uma formação nos últimos três anos) em formações especializadas e eficazes para melhorar as suas competências...                                                                                                         | 1)<br>Sim | 2) Sim, mas necessita de algumas melhorias | 3) Não, necessita de melhorias significativas |
| A5.1 na promoção, apoio e aconselhamento do aleitamento materno?                                                                                                                                                                                    |           |                                            |                                               |
| A5.2 na promoção pele a pele e sobre como manter o recém-nascido aquecido?                                                                                                                                                                          |           |                                            |                                               |



|                                                                                                                             |  |  |  |
|-----------------------------------------------------------------------------------------------------------------------------|--|--|--|
| A5.3 em precauções standardizadas (por exemplo, cuidados com o cordão umbilical, vacinação, avaliação de sinais de perigo)? |  |  |  |
|-----------------------------------------------------------------------------------------------------------------------------|--|--|--|

B. No que diz respeito às **emergências neonatais mais graves** (por exemplo, presença de líquido amniótico manchado de mecônio, recém-nascido prematuro ou de baixo peso, suspeita de sepsis neonatal, etc.), na unidade/departamento materno ou neonatal onde trabalha:

|                                                                                                                                                                                                                                                          | 1)<br>Sim | 2) Sim, mas<br>necessita<br>de algumas<br>melhorias | 3) Não,<br>necessita de<br>melhorias<br>significativas |
|----------------------------------------------------------------------------------------------------------------------------------------------------------------------------------------------------------------------------------------------------------|-----------|-----------------------------------------------------|--------------------------------------------------------|
| B1. Estão presentes infraestruturas físicas adequadas (por exemplo, água, eletricidade, saneamento, áreas específicas para recém-nascidos doentes estão disponíveis e logicamente concebidas para fornecer cuidados essenciais)                          |           |                                                     |                                                        |
| B2. São fornecidos equipamentos e materiais adequados para a prestação de cuidados essenciais, em quantidades suficientes, em todos os momentos.                                                                                                         |           |                                                     |                                                        |
| B3. Estão disponíveis para todos os funcionários diretrizes ou protocolos escritos, sobre procedimentos clínicos recomendados em emergências com recém nascidos, atualizados com base nas evidências mais recentes (Medicina Baseada na Evidência, MBE). |           |                                                     |                                                        |
| B4. O serviço disponibiliza práticas de supervisão de apoio no sentido da melhoria das competências práticas individuais (por exemplo, tutoria ou mentoring).                                                                                            |           |                                                     |                                                        |
| B5. Quando necessário, <b>o sistema de encaminhamento e transporte</b> é funcional e oferece cuidados de qualidade (isto é, seguro, disponível, sem demora, 24h/7 dias)                                                                                  |           |                                                     |                                                        |

|                                                                                                                                             | 1)<br>Sim | 2) Sim, mas<br>necessita<br>de algumas<br>melhorias | 3) Não,<br>necessita de<br>melhorias<br>significativas |
|---------------------------------------------------------------------------------------------------------------------------------------------|-----------|-----------------------------------------------------|--------------------------------------------------------|
| B6. Participou (pelo menos uma formação nos últimos três anos) em formações especializadas e eficazes para melhorar as suas competências... |           |                                                     |                                                        |
| em como lidar com a reanimação do recém-nascido?                                                                                            |           |                                                     |                                                        |

**Observe:** existem três versões diferentes da pergunta Q1 para os três questionários possíveis.

Para os profissionais de saúde que atuam na **área materna**:

**Q1. Dê-nos as suas sugestões e / ou comentários para melhorar o atendimento à grávida saudável e às emergências obstétricas mais graves e / ou respeito ao atendimento ao recém-nascido sem complicações.**

Para profissionais de saúde que atuam na **área neonatal**:

**Q1. Dê-nos as suas sugestões e / ou comentários para melhorar o atendimento ao recém-nascido sem complicações e nas emergências neonatais mais graves.**

Para parteiras que trabalham na **área materna e neonatal**:

**Q1. Dê-nos as suas sugestões e / ou comentários para melhorar o atendimento à grávida saudável e às emergências obstétricas mais graves e / ou respeito ao atendimento ao recém-nascido sem complicações e / ou nas emergências neonatais mais graves.**

|  |
|--|
|  |
|--|

## C. Organização de trabalho, gestão de dados e comunicação

No que diz respeito à **organização do trabalho**, na unidade/departamento materno ou neonatal onde trabalha:

|                                                                                                                                                                                                                                                                                      | 1)<br>Sim | 2) Sim, mas necessita de algumas melhorias | 3) Não, necessita de melhorias significativas |
|--------------------------------------------------------------------------------------------------------------------------------------------------------------------------------------------------------------------------------------------------------------------------------------|-----------|--------------------------------------------|-----------------------------------------------|
| C1. Existe um número suficiente de profissionais de saúde para garantir um atendimento adequado                                                                                                                                                                                      |           |                                            |                                               |
| C2. As funções e responsabilidades de cada profissional de saúde estão escritas e definidas de forma clara e compreensível.                                                                                                                                                          |           |                                            |                                               |
| C3. A passagem de turno é eficaz e completa em todos os aspetos relevantes do cuidado, respeitando e protegendo a confidencialidade de informação (por exemplo, informação inclui todos os dados clínicos relevantes e é discutida de forma a que outras pessoas não consigam ouvir) |           |                                            |                                               |

Relativamente à **recolha e uso de dados** na unidade/departamento materno ou neonatal onde trabalha:

|                                                                                                                                                                                                                                                                                                                                                                                                   | 1)<br>Sim | 2) Sim, mas necessita de algumas melhorias | 3) Não, necessita de melhorias significativas |
|---------------------------------------------------------------------------------------------------------------------------------------------------------------------------------------------------------------------------------------------------------------------------------------------------------------------------------------------------------------------------------------------------|-----------|--------------------------------------------|-----------------------------------------------|
| C4. Existe um sistema de recolha de dados clínicos (por exemplo, registo escrito ou informatizado) que é completo, preciso, confiável e fácil de consultar.                                                                                                                                                                                                                                       |           |                                            |                                               |
| C5. Existe uma lista de indicadores pré-identificados da qualidade dos cuidados (por exemplo, taxas das seguintes práticas: cesarianas usando a classificação Robson, episiotomias, manobra de Kristeller, induções, amamentação, contacto pele a pele, “método mãe-canguru”, etc.) usados para compilar relatórios estatísticos para serem regularmente partilhados e discutidos entre a equipa. |           |                                            |                                               |

No que diz respeito à **comunicação**, na unidade/departamento materno ou neonatal onde trabalha:

|                                                                                                                                                                                    | 1)<br>Sim | 2) Sim, mas necessita de algumas melhorias | 3) Não, necessita de melhorias significativas |
|------------------------------------------------------------------------------------------------------------------------------------------------------------------------------------|-----------|--------------------------------------------|-----------------------------------------------|
| C6. No geral, os profissionais de saúde têm uma comunicação eficaz com as mulheres e as suas famílias (por exemplo, certificando-se de que entendem e/ou dando a oportunidade para |           |                                            |                                               |

|                                                                                                                                                                                                                                                                 |  |  |  |
|-----------------------------------------------------------------------------------------------------------------------------------------------------------------------------------------------------------------------------------------------------------------|--|--|--|
| fazer perguntas e expressar opiniões livremente) usando linguagem simples e culturalmente aceitável                                                                                                                                                             |  |  |  |
| C7. As mulheres e as suas famílias recebem materiais educativos claros relacionados com a saúde materno-infantil, de forma acessível (escrita, digital ou ilustrada) disponíveis em todos os idiomas das comunidades atendidas pelo serviço materno ou neonatal |  |  |  |
| C8. Participou em formações eficazes para melhorar as suas competências de comunicação interpessoal e aconselhamento (por exemplo, sobre solicitação do consentimento informado)? (pelo menos uma formação/treino nos últimos 3 anos)                           |  |  |  |

Q2. Por favor deixe-nos as suas sugestões e/ou comentários para melhorar a **organização de trabalho, a comunicação e a recolha e utilização de dados.**

|  |
|--|
|  |
|--|

## D. Qualidade dos cuidados e práticas realizadas

No que diz respeito ao **apoio emocional, psicológico e suporte à tomada de decisão**, na unidade/departamento materno ou neonatal onde trabalha:

|                                                                                                                                                                                                                                                                                                                                                                                 | 1)<br>Sim | 2) Sim, mas necessita de algumas melhorias | 3) Não, necessita de melhorias significativas |
|---------------------------------------------------------------------------------------------------------------------------------------------------------------------------------------------------------------------------------------------------------------------------------------------------------------------------------------------------------------------------------|-----------|--------------------------------------------|-----------------------------------------------|
| D1. É garantida a possibilidade de todas as mulheres terem uma companhia à sua escolha, pelo tempo que considerarem necessário (isto é, durante todas as fases do trabalho de parto, parto e período pós-parto)                                                                                                                                                                 |           |                                            |                                               |
| D2. Participou em formações especializadas e eficazes para melhorar competências de suporte emocional às mulheres e na sua capacitação durante o parto e/ou no período pós-parto (por exemplo, compreender as influências do estado emocional na libertação de oxitocina e ensinar métodos práticos de gestão emocional) (pelo menos uma formação/treino nos últimos três anos) |           |                                            |                                               |

No que diz respeito à **proteção da privacidade das mulheres**, na unidade/departamento de saúde materna ou neonatal onde trabalha:

|                                                                                                                                                                                                                                                             | 1)<br>Sim | 2) Sim, mas necessita de algumas melhorias | 3) Não, necessita de melhorias significativas |
|-------------------------------------------------------------------------------------------------------------------------------------------------------------------------------------------------------------------------------------------------------------|-----------|--------------------------------------------|-----------------------------------------------|
| D3. Estão disponíveis infraestruturas adequadas para garantir a privacidade das mulheres e das suas famílias (por exemplo, quartos privados para visitas, disponibilidade de cortinas ou divisórias entre camas, número adequado de camas por quarto, etc.) |           |                                            |                                               |

|                                                                                                                                                                                                                                         |  |  |  |
|-----------------------------------------------------------------------------------------------------------------------------------------------------------------------------------------------------------------------------------------|--|--|--|
| D4. São implementadas todas as medidas necessárias para garantir a privacidade e confidencialidade das mulheres e das suas famílias (por exemplo, informação privada é discutida de forma a que outras pessoas não consigam ouvir etc.) |  |  |  |
|-----------------------------------------------------------------------------------------------------------------------------------------------------------------------------------------------------------------------------------------|--|--|--|

Q3. Por favor deixe-nos as suas sugestões e /ou comentários para melhorar **a proteção da privacidade das mulheres, o apoio psicológico e emocional e o suporte na tomada de decisão.**

|  |
|--|
|  |
|--|

**Observe:** existem duas versões diferentes da pergunta D5.1 para os três caminhos possíveis do questionário; as parteiras que atuam na área materna e neonatal devem responder ambas as versões.

No que diz respeito ao **direito das mulheres a uma escolha informada** na unidade/departamento de saúde materna ou neonatal onde trabalha:

Para os profissionais de saúde que atuam na **área materna**:

|                                                                                                                                                                                                                   |           |                                            |                                               |
|-------------------------------------------------------------------------------------------------------------------------------------------------------------------------------------------------------------------|-----------|--------------------------------------------|-----------------------------------------------|
| D5.1. Existe material escrito/digital que oriente os profissionais de saúde e descreva de forma abrangente os riscos e benefícios dos dois procedimentos a seguir, com o objetivo de informar melhor as mulheres: | 1)<br>Sim | 2) Sim, mas necessita de algumas melhorias | 3) Não, necessita de melhorias significativas |
| a) Cesariana                                                                                                                                                                                                      |           |                                            |                                               |
| b) Indução do parto                                                                                                                                                                                               |           |                                            |                                               |

Para profissionais de saúde que atuam na **área neonatal**:

|                                                                                                                                                                                                                   |           |                                            |                                               |
|-------------------------------------------------------------------------------------------------------------------------------------------------------------------------------------------------------------------|-----------|--------------------------------------------|-----------------------------------------------|
| D5.1. Existe material escrito/digital que oriente os profissionais de saúde e descreva de forma abrangente os riscos e benefícios dos dois procedimentos a seguir, com o objetivo de informar melhor as mulheres: | 1)<br>Sim | 2) Sim, mas necessita de algumas melhorias | 3) Não, necessita de melhorias significativas |
| a) Administração de vitamina K ao recém-nascido                                                                                                                                                                   |           |                                            |                                               |
| b) Aplicação de colírio/pomada nos olhos do recém-nascido                                                                                                                                                         |           |                                            |                                               |

No que diz respeito ao **direito das mulheres a uma escolha informada** na unidade/departamento de saúde materna ou neonatal onde trabalha:

|                                                                                                                                                                                                                                                  |           |                                            |                                               |
|--------------------------------------------------------------------------------------------------------------------------------------------------------------------------------------------------------------------------------------------------|-----------|--------------------------------------------|-----------------------------------------------|
|                                                                                                                                                                                                                                                  | 1)<br>Sim | 2) Sim, mas necessita de algumas melhorias | 3) Não, necessita de melhorias significativas |
| D5.2. Existem sessões regulares de orientação para grávidas, com o objetivo de as informar melhor acerca dos procedimentos que requerem consentimento.                                                                                           |           |                                            |                                               |
| D6. Participou em formações especializadas e eficazes sobre como informar adequadamente as mulheres e favorecer a escolha informada nos principais procedimentos relacionados com o parto (pelo menos uma formação/treino nos últimos três anos) |           |                                            |                                               |

Tendo em consideração outros aspetos da **qualidade dos cuidados**, na unidade/departamento materno ou neonatal onde trabalha:

|                                                                                                                                                                                                                                               | 1)<br>Sim | 2) Sim, mas<br>necessita<br>de algumas<br>melhorias | 3) Não,<br>necessita de<br>melhorias<br>significativas |
|-----------------------------------------------------------------------------------------------------------------------------------------------------------------------------------------------------------------------------------------------|-----------|-----------------------------------------------------|--------------------------------------------------------|
| D7. Há uma equipa na sua unidade/departamento dedicada a melhorar a qualidade dos cuidados de saúde e a equipa está a trabalhar eficazmente.                                                                                                  |           |                                                     |                                                        |
| D8. São organizadas reuniões, pelo menos uma vez por semana, para discutir os casos clínicos mais relevantes com todos os profissionais de saúde envolvidos nos cuidados.                                                                     |           |                                                     |                                                        |
| D9. Em casos de óbito materno e/ou neonatal, são organizadas reuniões/auditorias abertas e construtivas, com todos os profissionais de saúde envolvidos, para analisar o caso e definir ações para melhorar a qualidade dos cuidados.         |           |                                                     |                                                        |
| D10. Participou em formações especializadas e eficazes sobre os direitos da mulher e dos recém-nascidos durante o parto e período pós-natal em contexto hospitalar?<br>(pelo menos uma formação/treino nos últimos três anos)                 |           |                                                     |                                                        |
| D11. Participou em formações especializadas e eficazes sobre práticas de alívio da dor em mulheres (farmacológico e não-farmacológico) e/ou prevenção/ gestão da dor em recém-nascidos (pelo menos uma formação/treino nos últimos três anos) |           |                                                     |                                                        |

Q4. Por favor deixe-nos as suas sugestões e/ou comentários para melhorar os direitos das mulheres a uma escolha informada e outros aspetos da qualidade dos cuidados.

|  |
|--|
|  |
|--|

## E. COVID-19: preparação e resposta

Desde o início da pandemia COVID-19, qual foi o nível de **preparação e resposta** na unidade/departamento materno ou neonatal onde trabalha, no que diz respeito aos itens listados abaixo:

|                                                                                                                                                                                                                            | 1) Existente e/ou adequado desde o início da pandemia | 2) ) Nem sempre existente e/ou não totalmente adequado (por exemplo, ausente nas primeiras fases da pandemia) | 3) Nunca existiu e/ou nunca adequado, desde o início da pandemia até agora |
|----------------------------------------------------------------------------------------------------------------------------------------------------------------------------------------------------------------------------|-------------------------------------------------------|---------------------------------------------------------------------------------------------------------------|----------------------------------------------------------------------------|
| E1. Para reduzir o risco de infeção, foi estabelecido um circuito específico para pacientes com suspeita/confirmação de COVID-19 desde o momento em que entram no hospital ou na unidade/departamento materno ou neonatal. |                                                       |                                                                                                               |                                                                            |
| E2. Têm sido distribuídos regularmente e em número suficiente, equipamentos de proteção individual (por exemplo, máscaras, luvas, batas) para os profissionais de saúde.                                                   |                                                       |                                                                                                               |                                                                            |

|                                                                                                                                                                                                                                                                                   |  |  |  |
|-----------------------------------------------------------------------------------------------------------------------------------------------------------------------------------------------------------------------------------------------------------------------------------|--|--|--|
| E3. Foi disponibilizado um número apropriado de postos de higienização das mãos (equipadas com água, sabão, papel e soluções com álcool) a funcionar e acessíveis para todos os profissionais de saúde, mulheres e seus familiares.                                               |  |  |  |
| E4. Diretrizes claras e específicas para a assistência a mulheres e/ou recém-nascidos, têm sido disponibilizadas a todos os profissionais de saúde e atualizadas de acordo com as recomendações internacionais mais recentes (por exemplo, OMS, FIGO, NICE, RCOG etc.)            |  |  |  |
| E5. Têm sido disponibilizados equipamentos e materiais para testes de diagnóstico para COVID-19 (isto é, zaragatoas e reagentes) em quantidades suficientes, para todos os casos suspeitos entre mulheres, recém-nascidos e profissionais de saúde.                               |  |  |  |
| E6. Tem sido disponibilizado, para todos os profissionais de saúde, formação adequada cobrindo os principais procedimentos impostos pela pandemia COVID-19 (por exemplo, medidas de controlo e prevenção da infeção, uso apropriado de equipamento de proteção individual, etc.). |  |  |  |

Desde o início da pandemia de COVID-19, as seguintes situações alguma vez ocorreram, na unidade/departamento materno ou neonatal onde trabalha?

|                                                                                                                                                                                                        | 1) Nunca aconteceram | 2) Aconteceram durante a pandemia COVID-19 (apenas nalgumas fases ou durante todas as fases) | 3) Aconteceram independentemente da pandemia COVID-19 |
|--------------------------------------------------------------------------------------------------------------------------------------------------------------------------------------------------------|----------------------|----------------------------------------------------------------------------------------------|-------------------------------------------------------|
| E7. Encerramento de enfermarias de maternidade e/ou redução na quantidade de serviços de rotina (por exemplo, visitas ambulatoriais, ecografias) e/ou redução de camas para mulheres ou recém-nascidos |                      |                                                                                              |                                                       |
| E8. Número insuficiente de profissionais de saúde para fornecer cuidados essenciais à mãe e ao recém-nascido                                                                                           |                      |                                                                                              |                                                       |
| E9. Silenciamento (censura) dos funcionários para evitar relatar procedimentos clínicos e/ou administrativos inadequados                                                                               |                      |                                                                                              |                                                       |

E10. Desde o início da pandemia de COVID-19, alguma das seguintes situações já aconteceu na unidade/departamento materno ou neonatal onde trabalha?

|                                                                                                                                                                                                                                                                                                                         | 1) Nunca aconteceram | 2) Aconteceram durante a pandemia COVID-19 (apenas nalgumas fases ou durante todas as fases) | 3) Aconteceram independentemente da pandemia COVID-19 |
|-------------------------------------------------------------------------------------------------------------------------------------------------------------------------------------------------------------------------------------------------------------------------------------------------------------------------|----------------------|----------------------------------------------------------------------------------------------|-------------------------------------------------------|
| E10a. Aumento da medicação no processo de parto (por exemplo, uso inadequado de oxitocina, aumento da taxa de episiotomias, parto instrumental e/ou cesarianas, etc.)                                                                                                                                                   |                      |                                                                                              |                                                       |
| E10b. Restrições à companhia da escolha da mulher, na ausência de indicações clínicas claras                                                                                                                                                                                                                            |                      |                                                                                              |                                                       |
| E10c. Limitações na liberdade de movimentos durante o parto, na ausência de indicações clínicas claras                                                                                                                                                                                                                  |                      |                                                                                              |                                                       |
| E10d. Limitações nas opções de alívio da dor (farmacológico e não-farmacológico) para todas as mulheres que o solicitem, durante todas as fases do parto                                                                                                                                                                |                      |                                                                                              |                                                       |
| E10e. Limitações ao alojamento conjunto (mãe/bebé), na ausência de indicações clínicas claras                                                                                                                                                                                                                           |                      |                                                                                              |                                                       |
| E10f. Limitações na amamentação, na ausência de indicações clínicas claras (por favor, note que: as diretrizes internacionais atualmente não indicam positividade para COVID-19 com ausência de doença grave como uma indicação clínica clara para limitar a amamentação)                                               |                      |                                                                                              |                                                       |
| E10g. Limitações no contacto pele-a-pele na primeira hora após o parto, na ausência de indicações clínicas claras (por favor, note que: as diretrizes internacionais atualmente não indicam positividade de COVID-19 com ausência de doença grave como uma indicação clínica clara para limitar o contacto pele-a-pele) |                      |                                                                                              |                                                       |

Q5. Por favor, deixe-nos as suas sugestões e/ou comentários para melhorar o nível de preparação e resposta na unidade/departamento materno ou neonatal onde trabalha, ainda durante a pandemia COVID-19, ou pensando em futuras situações de calamidade.

## F. Considerações finais

F1. De um modo geral, acha que a unidade/departamento onde trabalha respondeu adequadamente à pandemia COVID-19?

- 1) Sim, a unidade/departamento materno ou neonatal respondeu adequadamente
- 2) Sim, mas a resposta necessita de algumas melhorias
- 3) Não, a resposta necessita de melhorias significativas

F2. Os seus níveis de stress relacionados com o trabalho mudaram durante a pandemia de COVID-19?

- 1) Aumentaram significativamente
- 2) Aumentaram ligeiramente
- 3) Não mudaram
- 4) Diminuíram ligeiramente
- 5) Diminuíram, significativamente

F3. De modo geral, desde o início da pandemia até agora, quão satisfeito(a) está com o seu trabalho?

|                          |                    |           |                  |                        |
|--------------------------|--------------------|-----------|------------------|------------------------|
| 1- Muito insatisfeito(a) | 2- Insatisfeito(a) | 3- Neutro | 4- Satisfeito(a) | 5- Muito satisfeito(a) |
|--------------------------|--------------------|-----------|------------------|------------------------|

## G. Socio-demographic data

G1. Há quantos anos trabalha na área de cuidados de saúde materna ou neonatal?

- 1) Menos de 5
- 2) Entre 5 e 10
- 3) Mais de 10

G2. Em que país trabalha? (Por favor selecione o país)

Lista das 53 países da região europeia da OMS.

Se o HW respondido dos seguintes países estará disponível uma pergunta adicional especificando a região: Bósnia, Croácia, França, Alemanha, Itália, Noruega, Portugal, Romênia, Sérvia, Espanha, Suécia, Reino Unido.

G2a. Este estudo é exclusivo para a região europeia da OMS, que inclui 53 países, cobrindo uma vasta região geográfica do Atlântico ao Pacífico.

Se não consegue encontrar o seu país na lista, de onde você é? Por favor especifique.

G3. Qual é a sua idade?

- 1) 20-29
- 2) 30-39
- 3) 40-49
- 4) 50-59
- 5) 60-69
- 6)  $\geq 70$

G4. Como descreveria o seu género?

- 1) Masculino
- 2) Feminino
- 3) Outro
- 4) Prefiro descrever-me como pessoa não-binária / género-fluído / agénero
- 5) Prefiro não responder

G5. Data de preenchimento do questionário (dia-mês-ano): \_\_\_\_\_

A data ajudar-nos-á a interpretar resultados à luz das diferentes fases da pandemia de COVID-19 em cada país.



G6. Gostaria de receber por e-mail os resultados deste estudo assim que estiver concluído?

Os dados vão ser tratados de acordo com as diretrizes para o processamento de dados pessoais e o seu endereço de e-mail não será divulgado em nenhuma fase nem partilhado com outros.

- 1) Sim (→ G6a)
- 2) Não

G6a. O seu endereço de e-mail não ficará de forma alguma associado às respostas dadas a este questionário.

Ao disponibilizar o meu contacto de e-mail, nos termos e para os efeitos dos artigos 13 e 23 do Decreto Lei n. 196/2003, relativo ao tratamento de dados pessoais de acordo com os métodos e dentro dos limites estabelecidos no referido decreto:

“Faculto, voluntariamente, o meu endereço de e-mail para receber os resultados deste estudo, assim que o mesmo estiver concluído”

G7. Como é que soube deste estudo? (Escolha todas as opções que se aplicam)

- 1) Plataforma de redes sociais que utiliza (Facebook/Instagram)
- 2) Pesquisa na Internet (por exemplo, Google)
- 3) E-mail recebido de um amigo/família/trabalho/colega
- 4) Boca a boca
- 5) Imprensa (por exemplo, rádio, jornais, televisão)
- 6) Outro (por favor, especifique)

Q6. Por favor dê-nos as suas sugestões para melhorar a qualidade dos cuidados de saúde materno-infantis prestados na unidade/ departamento materno ou neonatal onde trabalha e/ou para aprimorar este questionário

**Ao pressionar o botão “submeter” abaixo, irá enviar-nos as suas respostas**

**Se deseja contactar a equipa de investigação no seu país, por favor faça download do arquivo abaixo.**

**Terminou: obrigada por dedicar o seu tempo para completar este questionário.**

**Desejamos-lhe um ótimo dia!**

## Supplementary Table 10. Final health workers' IMAGINE questionnaire in Norwegian

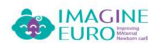

Internasjonalt prosjekt

# IMAGINE EURO

(Improving MAternal Newborn carE in the European Region)

*Nettbasert spørreundersøkelse om beredskap, kvalitet og robusthet i helsetjenester for mødre og nyfødte under COVID-19 pandemien. Undersøkelsen er rettet mot WHO's (verdens helseorganisasjon) europeiske region.*

*Spørreundersøkelsen er basert på WHO's standarder for kvalitetsforbedring i helsetjenester til mor og barn ved helseinstitusjoner*

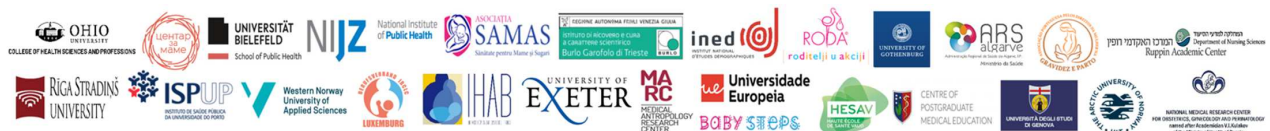

## Er du helsepersonell ansatt i helsevesenet og er direkte involvert i omsorgen for mødre/kvinner/nyfødte under COVID-19 pandemien?

### Ta del i undersøkelsen, din mening betyr noe!

Din deltakelse er frivillig: **Det tar omtrent 15 minutter å svare på spørsmålene.**

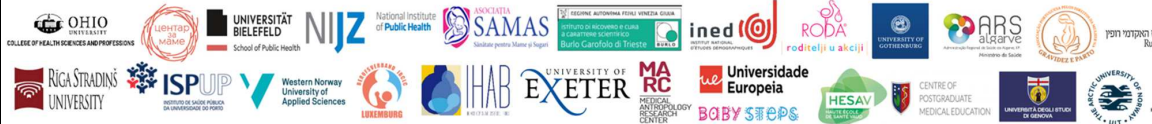

Spørreundersøkelsen er basert på **WHO's standarder for forbedring av omsorg for mødre og nyfødte i helseinstitusjoner.**

Denne undersøkelsen er beregnet for jordmødre, obstetrikere/gynekologer, barneleger, LIS-leger og sykepleiere som jobber med fødsel og nyfødtomsorg.

**Vi er opptatt av ditt personvern.**

**For mer informasjon om studien og hvordan vi behandler og bruker de innsamlede dataene, vennligst les dokumentet om informert samtykke og personvern som kan lastes ned via lenken nedenfor.**

Denne undersøkelsen er beregnet for jordmødre, obstetrikere/gynekologer, barneleger, LIS-leger og sykepleiere som jobber med fødsel og nyfødtomsorg.

Hvis du ikke identifiserer deg med noen av yrkesgruppene nevnt ovenfor kan du lukke nettsiden.

Takk allikevel for din interesse i forskningsprosjektet vårt.

Hvis du kjenner noen som kunne tenke seg å delta og som oppfyller kriteriene, må du gjerne sende vedkommende en lenke til spørreskjemaet.

Nok en gang, takk for at du tok deg tid

**Ved å gi samtykke til følgende spørsmål velger du å frivillig delta i undersøkelsen.**

#### **SAMTYKKE TIL DELTAKELSE:**

**Jeg har lest og forstått samtykkeskjemaet på forrige side, og ved å velge "ja" under, samtykker jeg til frivillig å delta i studien**

1) Ja (→S1)

2) Nei (spørreskjemaet kan ikke fylles ut → en melding vil være tilgjengelig for å takke interessen)

**If NO:** Det vil ta omtrent 15 minutter å svare på spørsmålene. Hvis du kjenner noen som vil delta kan du dele lenken med dem. Takk for at du tok deg tid! Vi ønsker deg en fin dag!

**KARTLEGGINGSSPØRSMÅL:**

**S1. Er du helsepersonell og har vært direkte involvert i omsorg for/behandling av kvinner/mødre/nyfødte på en institusjon i mer enn 1 år?**

- 1) Ja (→S2)
- 2) Nei (spørreskjemaet kan ikke fylles ut →en melding vil være tilgjengelig for å takke interessen)

**If NO:** Takk for at du er interessert i forskningsprosjektet vårt.

For å delta er det nødvendig å ha vært direkte involvert i omsorg for mødre/kvinner/nyfødte på institusjonsnivå i mer enn 1 år. Hvis du kjenner noen som har det, kan du dele lenken med dem. Takk for at du tok deg tid! Vi ønsker deg en fin dag!

**S2. Har du vært direkte involvert i omsorg for mødre/kvinner eller nyfødte i helsevesenet fra 1. mars 2020?**

- 1) Ja (→S3)
- 2) Nei (spørreskjemaet kan ikke fylles ut →en melding vil være tilgjengelig for å takke interessen)

**If NO:** Takk for at du er interessert i forskningen vår.

For å delta er det nødvendig å ha vært direkte involvert i omsorg for kvinner/mødre/nyfødte i helsevesenet siden 1. mars 2020. Hvis du kjenner noen som har det, kan du dele lenken med dem. Takk for at du tok deg tid! Vi ønsker deg en fin dag!

**S3. Hvilken type institusjon for kvinner/nyfødte jobber du på:**

**Merk:** Hvis du jobber på mer enn en institusjon, velg det du vil tenke på når du svarer på spørreundersøkelsen

- 1) Public Offentlig institusjon
- 2) Privat institusjon

**S4. Hva er din faglige kvalifikasjon?**

- 1) Fastlege som for tiden jobber innen mødrehelse (→Mødreområde: seksjon A-B)
- 2) Fastlege som for tiden jobber innen nyfødthelse (→Neonatalområde: seksjon A-B)
- 3) Jordmor (→ S4a)
- 4) Sykepleier innen mødrehelse (→Mødreområde: seksjon A-B)
- 5) Sykepleier innen nyfødthelse (barselavdeling eller nyfødt intensiv) (→Neonatalområde: seksjon A-B)
- 6) Pediatr (→Neonatalområde: seksjon A-B)
- 7) Obstetriker eller gynekolog (→Mødreområde: seksjon A-B)
- 8) LiS-lege i obstetrikk eller gynekologi (→Mødreområde: seksjon A-B)
- 9) LiS-lege i pediatri (→Neonatalområde: seksjon A-B)

**S4a. Innen hvilket fagfelt jobber du mesteparten av tiden?**

- 1) Jeg jobber hovedsakelig i en kombinert føde/barselavdeling (→Mødreområde: seksjon A-B)
- 2) Jeg jobber hovedsakelig i en barselavdeling eller annen avdeling med ansvar for nyfødte (for eksempel nyfødt intensivavdeling) (→Neonatalområde: seksjon A-B)
- 3) Jeg jobber hovedsakelig i en fødeavdeling (Både mors- og neonatale områder: seksjon A-B)

## Fødselsomsorg (del A-del B)

G. A. Når det gjelder omsorg for **friske gravide kvinner i spontan fødsel**, i avdelingen der du jobber:

|                                                                                                                                                                                                     | 1)Ja | 2) Ja, men trenger noe forbedring | 3)Nei, det trenger betydelig forbedring |
|-----------------------------------------------------------------------------------------------------------------------------------------------------------------------------------------------------|------|-----------------------------------|-----------------------------------------|
| A1. Tilstrekkelig fysisk infrastruktur er til stede (dvs. vann, elektrisitet, sanitære forhold, arbeidsområder er tilgjengelig og logisk utformet for å opprettholde kontinuitet i omsorgen)        |      |                                   |                                         |
| A2. Passende utstyr og forsyninger er tilgjengelig for nødvendig pleie i tilstrekkelige mengder til enhver tid                                                                                      |      |                                   |                                         |
| A3. Skriftlige retningslinjer eller protokoller med anbefalte kliniske prosedyrer for friske gravide, basert på oppdatert kunnskap (kunnskapsbasert praksis, KBP), er tilgjengelig for alle ansatte |      |                                   |                                         |
| A4. Velfungerende veiledning internt på avdelingen blir organisert for å forbedre personlige ferdigheter                                                                                            |      |                                   |                                         |

| A5. Har du deltatt i ferdighetstrening for å kunne håndtere (minst en gang de siste tre årene):                  | 1)Ja | 2) Ja, men trenger noe forbedring | 3)Nei, det trenger betydelig forbedring |
|------------------------------------------------------------------------------------------------------------------|------|-----------------------------------|-----------------------------------------|
| A5.1 bruken av partogram?                                                                                        |      |                                   |                                         |
| A5.2 fosterovervåkning (for eksempel intermitterende auskultasjon og/eller CTG)?                                 |      |                                   |                                         |
| A5.3 hvordan redusere keisersnitt uten medisinsk indikasjon eller induksjon av fødsel uten medisinsk indikasjon? |      |                                   |                                         |

H. Når det gjelder alvorlige **akutte tilstander innen fødselshjelp** (f.eks. postpartum blødning, eklampsi, skulderdystoci, hjertestans hos en gravid kvinne osv.) på avdelingen hvor du jobber, er det:

|                                                                                                                                                                                                                             | 1)Ja | 2) Ja, men trenger noe forbedring | 3)Nei, det trenger betydelig forbedring |
|-----------------------------------------------------------------------------------------------------------------------------------------------------------------------------------------------------------------------------|------|-----------------------------------|-----------------------------------------|
| B1. Tilstrekkelig fysisk infrastruktur er tilstede (dvs. vann, elektrisitet, sanitæranlegg og områder for akutte prosedyrer er tilgjengelige og logisk utformet for å kunne gi viktig behandling)                           |      |                                   |                                         |
| B2. Passende utstyr og forsyninger er tilgjengelig for nødvendig pleie i tilstrekkelige mengder til enhver tid                                                                                                              |      |                                   |                                         |
| B3. Skriftlige retningslinjer eller protokoller med anbefalte kliniske prosedyrer for akutte tilstander innen fødselsomsorgen, basert på oppdatert kunnskap (kunnskapsbasert praksis, KBP) er tilgjengelig for alle ansatte |      |                                   |                                         |
| B4. Velfungerende veiledning for å forbedre personlige, praktiske ferdigheter blir organisert på avdelingen                                                                                                                 |      |                                   |                                         |
| B5. Når det er nødvendig, fungerer det akutte henvisnings- og overføringssystemet og gir pleie med tilstrekkelig kvalitet (dvs. trygt, tilgjengelig uten forsinkelse 24 timer i døgnet, hele uka)                           |      |                                   |                                         |

| B6. Har du deltatt i ferdighetstrening for å kunne håndtere (minst en gang de siste 3 årene): | 1)Ja | 2) Ja, men trenger noe forbedring | 3)Nei, det trenger betydelig forbedring |
|-----------------------------------------------------------------------------------------------|------|-----------------------------------|-----------------------------------------|
| B6.1 postpartum blødning?                                                                     |      |                                   |                                         |
| B6.2 eklampsi?                                                                                |      |                                   |                                         |
| B6.3 skulderdystoci?                                                                          |      |                                   |                                         |
| B6.4 hjertestans hos gravide?                                                                 |      |                                   |                                         |

## Nyfødtomsorg (del A-del B)

A. Når det gjelder omsorgen for **nyfødte barn uten komplikasjoner**, i avdelingen der du jobber::

|                                                                                                                                                                                                        | 1)Ja | 2) Ja, men trenger noe forbedring | 3)Nei, det trenger betydelig forbedring |
|--------------------------------------------------------------------------------------------------------------------------------------------------------------------------------------------------------|------|-----------------------------------|-----------------------------------------|
| A1. Det er tilstrekkelig fysisk infrastruktur (dvs. vann, elektrisitet, sanitære forhold og områder for friske nyfødte er tilgjengelige og logisk utformet for å opprettholde kontinuitet i omsorgen)  |      |                                   |                                         |
| A2. Det er passende utstyr og materiell til nødvendig pleie i tilstrekkelige mengder til enhver tid                                                                                                    |      |                                   |                                         |
| A3. Det er skriftlige retningslinjer eller protokoller med anbefalte kliniske prosedyrer for friske nyfødte, basert på oppdatert kunnskap (kunnskapsbasert praksis, KBP) tilgjengelig for alle ansatte |      |                                   |                                         |
| A4. Velfungerende veiledning for å forbedre personlige, praktiske ferdigheter blir organisert på avdelingen                                                                                            |      |                                   |                                         |

| A5. Har du deltatt i ferdighetstrening for å kunne håndtere (minst en gang de siste tre årene):       | 1)Ja | 2) Ja, men trenger noe forbedring | 3)Nei, det trenger betydelig forbedring |
|-------------------------------------------------------------------------------------------------------|------|-----------------------------------|-----------------------------------------|
| A5.1 promotering, støtte og rådgivning om amming?                                                     |      |                                   |                                         |
| A5.2 i promotering av hud-mot-hud kontakt og hvordan holde nyfødte varme?                             |      |                                   |                                         |
| A5.3 i standardprosedyrer (stell av navlestump, vaksinerings, vurdering av sykdomstegn/faresignaler)? |      |                                   |                                         |

B. Når det gjelder **alvorlige tilstander for nyfødte** (f.eks. ved mekoniumsfarget fostervann, prematuritet eller nyfødte med lav fødselsvekt, mistenkt sepsis hos barnet osv.), på avdeling der du jobber::

|                                                                                                                                                                                   | 1)Ja | 2) Ja, men trenger noe forbedring | 3)Nei, det trenger betydelig forbedring |
|-----------------------------------------------------------------------------------------------------------------------------------------------------------------------------------|------|-----------------------------------|-----------------------------------------|
| B1. Det er tilstrekkelig fysisk infrastruktur (dvs. vann, elektrisitet, sanitæranlegg og lokaler for syke nyfødte er tilgjengelige og logisk utformet for å gi viktig behandling) |      |                                   |                                         |

|                                                                                                                                                                                                                             |  |  |  |
|-----------------------------------------------------------------------------------------------------------------------------------------------------------------------------------------------------------------------------|--|--|--|
| B2. Det er passende utstyr og materiell for nødvendig behandling i tilstrekkelige mengder til enhver tid                                                                                                                    |  |  |  |
| B3. Det er skriftlige retningslinjer eller protokoller med anbefalte kliniske prosedyrer for akutsituasjoner innen nyfødtmedisin, basert på oppdatert kunnskap (kunnskapsbasert praksis, KBP) tilgjengelig for alle ansatte |  |  |  |
| B4. Fungerende, støttende veiledning er organisert for å forbedre personlige praktiske ferdigheter                                                                                                                          |  |  |  |
| B5. Når det er nødvendig, fungerer det akutte henvisnings- og overføringssystemet og gir pleie med tilstrekkelig kvalitet (dvs. trygt, tilgjengelig uten forsinkelse 24 timer i døgnet, hele uka)                           |  |  |  |

|                                                                                                   |      |                                   |                                         |
|---------------------------------------------------------------------------------------------------|------|-----------------------------------|-----------------------------------------|
| B6. Har du deltatt i ferdighetstrening for å kunne håndtere (minst en gang de siste tre årene)... | 1)Ja | 2) Ja, men trenger noe forbedring | 3)Nei, det trenger betydelig forbedring |
| resuscitering av nyfødte?                                                                         |      |                                   |                                         |

**Merk:** Det er tre forskjellige versjoner av spørsmål Q1 for de tre mulige spørreskjemaveiene.

For helsepersonell som jobber i **mødreområdet**:

**Q1. Foreslå gjerne og/eller kommenter i forhold til hvordan omsorgen kan forbedres for friske gravide og de mest alvorlige obstetriske komplikasjonene og/eller for omsorgen for et nyfødt barn uten komplikasjoner.**

For helsepersonell som arbeider i **neonatalområdet**:

**Q1. Foreslå gjerne og/eller kommenter når det gjelder hvordan omsorgen kan forbedres for et nyfødt barn uten komplikasjoner og de mest alvorlige akutsituasjonene som gjelder nyfødte.**

For jordmødre som arbeider i **både mors- og nyfødtområdet**:

**Q1. Foreslå gjerne og/eller kommenter når det gjelder hvordan omsorgen kan forbedres for friske fødende og de mest alvorlige obstetriske komplikasjonene og/eller respekten for omsorgen for et nyfødt barn uten komplikasjoner og/eller de alvorligste nyfødtkomplikasjonene..**

## C. Organisering av arbeid, datahåndtering og kommunikasjon

Når det gjelder **arbeidsorganisering** på avdelingen der du jobber:

|  |      |                                   |                                         |
|--|------|-----------------------------------|-----------------------------------------|
|  | 1)Ja | 2) Ja, men trenger noe forbedring | 3)Nei, det trenger betydelig forbedring |
|--|------|-----------------------------------|-----------------------------------------|

|                                                                                                         |  |  |  |
|---------------------------------------------------------------------------------------------------------|--|--|--|
| C1. Det er tilstrekkelig antall helsepersonell for å sikre adekvat pleie og behandling                  |  |  |  |
| C2. Rolle- og ansvarsfordelingen for forskjellig helsepersonell er tydelig beskrevet og klart definert  |  |  |  |
| C3. Ved vaktskifter er rapporteringen effektiv og grundig, og taushetsplikten overholdes og respekteres |  |  |  |

Om innsamling av **informasjon og bruk av informasjon** på avdelingen der du jobber:

|                                                                                                                                                                                                                                                                                                                                                              | 1)Ja | 2) Ja, men trenger noe forbedring | 3)Nei, det trenger betydelig forbedring |
|--------------------------------------------------------------------------------------------------------------------------------------------------------------------------------------------------------------------------------------------------------------------------------------------------------------------------------------------------------------|------|-----------------------------------|-----------------------------------------|
| C4. Det er et rapporteringssystem (f.eks. protokoll eller dataregister) som er komplett, nøyaktig, pålitelig og lett å konsultere                                                                                                                                                                                                                            |      |                                   |                                         |
| C5. Det er en liste over forhåndsidentifiserte indikatorer for omsorgskvalitet (f.eks. frekvens for følgende prosedyrer: keisersnitt ved bruk av Robson-klassifisering, episiotomier, fundustrykk, induksjoner, amming, hud-mot-hud, kengurupleie osv.), brukt til å organisere statistiske rapporter som regelmessig skal deles og diskuteres blant ansatte |      |                                   |                                         |

Om **kommunikasjon** på avdelingen hvor du jobber:

|                                                                                                                                                                                                                                                                       | 1)Ja | 2) Ja, men trenger noe forbedring | 3)Nei, det trenger betydelig forbedring |
|-----------------------------------------------------------------------------------------------------------------------------------------------------------------------------------------------------------------------------------------------------------------------|------|-----------------------------------|-----------------------------------------|
| C6. Generelt har helsepersonalet en velfungerende kommunikasjon med kvinnene og familiene (for eksempel ved å sørge for at de forstår og/eller gir muligheten til å stille spørsmål og fritt uttrykke meninger) ved å bruke et enkelt og kulturelt akseptabelt språk. |      |                                   |                                         |
| C7. Kvinnene og deres familier tilbys lettforståelig læremateriell som omhandler mor-barn helse, i et tilgjengelig format (skriftlig, digitalt eller grafisk), tilgjengelig på alle relevante språk                                                                   |      |                                   |                                         |
| C8. Du har deltatt i ferdighetstrening/undervisning for å styrke dine ferdigheter i mellommenneskelig kommunikasjon og rådgivning (f.eks. forespørsel om informert samtykke) (minst en gang de siste tre årene)                                                       |      |                                   |                                         |

Q2. Gi dine forslag og/eller kommentarer for å forbedre arbeidsorganiseringen, datainnsamling og bruk av data, og kommunikasjon.

## D. Kvalitet på omsorg og klinisk praksis

Om **emosjonell og psykologisk støtte, samt beslutningsstøtte**, i avdelingen der du jobber:



|                                                                                                                                                                                                                                                                                                                                                                | 1)Ja | 2) Ja, men trenger noe forbedring | 3)Nei, det trenger betydelig forbedring |
|----------------------------------------------------------------------------------------------------------------------------------------------------------------------------------------------------------------------------------------------------------------------------------------------------------------------------------------------------------------|------|-----------------------------------|-----------------------------------------|
| D1. Kvinner er garantert å ha med seg en ledsager etter eget ønske, så lenge de anser det som nødvendig (dvs. gjennom alle faser av fødsel og barselperioden)                                                                                                                                                                                                  |      |                                   |                                         |
| D2. Du har deltatt i ferdighetstrening/undervisning for å styrke spesifikke ferdigheter i å gi kvinner emosjonell støtte og styrke dem/myndiggjøre dem under fødsel og/eller barsel (for eksempel å forstå påvirkningene av emosjonell status på utskilling av oksytocin og lære praktiske metoder for å håndtere følelser) (minst en gang de siste tre årene) |      |                                   |                                         |

Om vern av **privatliv for kvinner** på avdelingen der du jobber:

|                                                                                                                                                                                                                               | 1)Ja | 2) Ja, men trenger noe forbedring | 3)Nei, det trenger betydelig forbedring |
|-------------------------------------------------------------------------------------------------------------------------------------------------------------------------------------------------------------------------------|------|-----------------------------------|-----------------------------------------|
| D3. Det er tilstrekkelig infrastruktur for å sikre personvernet til kvinner og deres familier (f.eks. egne rom for besøk, tilgjengelighet av gardiner eller skillevegger mellom sengene, passende antall senger per rom osv.) |      |                                   |                                         |
| D4. Alle nødvendige tiltak for å garantere personvern og konfidensialitet for kvinner og deres familier blir utført (f.eks. privat informasjon blir diskutert på en måte som andre ikke kan høre osv.)                        |      |                                   |                                         |

Q3. Her kan du skrive dine forslag og/eller kommentarer om hvordan man kan forbedre emosjonell, psykologisk og beslutningsstøtte for kvinnene, og hvordan man kan forbedre vern om kvinners rett til privatliv.

**Vennligst merk:** det er to forskjellige versjoner av spørsmål D5.1 for de tre mulige spørreskjemaveiene; jordmødre som jobber både i mors- og neonatalområdet bør svare på begge versjonene.

Når det **gjelder kvinners rett til et informert valg** i avdelingen der du jobber:

For helsepersonell som jobber i **mødreområdet**:

| D5.1. Finnes det skriftlig/digital brukerinformasjon tilgjengelig for helsepersonell som beskriver fordeler og ulemper med de to følgende prosedyrene: | 1)Ja | 2) Ja, men trenger noe forbedring | 3)Nei, det trenger betydelig forbedring |
|--------------------------------------------------------------------------------------------------------------------------------------------------------|------|-----------------------------------|-----------------------------------------|
| a) Keisersnitt                                                                                                                                         |      |                                   |                                         |
| b) Induksjon av fødsel                                                                                                                                 |      |                                   |                                         |

For helsepersonell som arbeider i **neonatalområdet**:

|                                                                                                                                                        |      |                                   |                                         |
|--------------------------------------------------------------------------------------------------------------------------------------------------------|------|-----------------------------------|-----------------------------------------|
| D5.1. Finnes det skriftlig/digital brukerinformasjon tilgjengelig for helsepersonell som beskriver fordeler og ulemper med de to følgende prosedyrene: | 1)Ja | 2) Ja, men trenger noe forbedring | 3)Nei, det trenger betydelig forbedring |
| a) Administrering av vitamin K-profylakse                                                                                                              |      |                                   |                                         |
| b) Nyfødtscreening                                                                                                                                     |      |                                   |                                         |

Når det gjelder kvinners rett til et informert valg i avdelingen der du jobber:

|                                                                                                                                                                                                               |      |                                   |                                         |
|---------------------------------------------------------------------------------------------------------------------------------------------------------------------------------------------------------------|------|-----------------------------------|-----------------------------------------|
|                                                                                                                                                                                                               | 1)Ja | 2) Ja, men trenger noe forbedring | 3)Nei, det trenger betydelig forbedring |
| D5.2. Det finnes regelmessige informasjonsmøter for gravide der hensikten er å sikre at kvinnen er informert om prosedyrer som krever informert samtykke                                                      |      |                                   |                                         |
| D6. Du har deltatt i ferdighetstrening/undervisning om hvordan du på passende måte kan informere kvinner og fremme informert valg om viktige prosedyrer knyttet til fødsel (minst en gang de siste tre årene) |      |                                   |                                         |

Om andre aspekter ved kvaliteten på omsorg på avdelingen der du jobber:

|                                                                                                                                                                                                                                             |      |                                   |                                         |
|---------------------------------------------------------------------------------------------------------------------------------------------------------------------------------------------------------------------------------------------|------|-----------------------------------|-----------------------------------------|
|                                                                                                                                                                                                                                             | 1)Ja | 2) Ja, men trenger noe forbedring | 3)Nei, det trenger betydelig forbedring |
| D7. Det finnes en fungerende gruppe ved din avdeling som arbeider målrettet med kvalitetsforbedring                                                                                                                                         |      |                                   |                                         |
| D8. Det arrangeres møter minst en gang i uka for å diskutere de mest relevante kliniske tilfellene for alt involvert helsepersonell                                                                                                         |      |                                   |                                         |
| D9. I tilfeller med dødsfall blant kvinner eller nyfødte på avdelingen, organiseres åpne og konstruktive gjennomganger for alt involvert helsepersonell, for å analysere saken og bli enige om tiltak for å forbedre kvaliteten på omsorgen |      |                                   |                                         |
| D10. Du har deltatt i ferdighetstrening/undervisning som omhandler rettigheter til kvinner og nyfødte under fødsel og etter fødselen på avdelingen (minst en gang de siste tre årene)                                                       |      |                                   |                                         |
| D11. Du har deltatt i ferdighetstrening/undervisning om rutiner for smertelindring for kvinner (farmakologisk og ikke-farmakologisk) og/eller forebygging/behandling av smerte hos nyfødte (minst en gang de siste tre årene)               |      |                                   |                                         |

Q4. Gi dine forslag og/eller kommentarer for å forbedre kvinners rettigheter til et informert valg og andre aspekter ved kvaliteten på omsorg.

## E. COVID-19: beredskap og respons

Siden begynnelsen av COVID-19 pandemien, hva var nivået for beredskap og respons på avdelingen der du jobber, med hensyn til elementene listet opp nedenfor:

|                                                                                                                                                                                                                                       | 1) Eksisterende og/eller tilstrekkelig siden pandemien begynte | 2) Ikke alltid eksisterende og/eller ikke fullstendig tilstrekkelig (f.eks. manglet i de første fasene av pandemien) | 3) Har aldri eksistert og/eller aldri tilstrekkelig fra begynnelsen av pandemien og til nå |
|---------------------------------------------------------------------------------------------------------------------------------------------------------------------------------------------------------------------------------------|----------------------------------------------------------------|----------------------------------------------------------------------------------------------------------------------|--------------------------------------------------------------------------------------------|
| E1. Et planlagt pasientforløp for pasienter med mistenkt / bekreftet COVID-19 fra det øyeblikket de kommer inn i avdelingen, er etablert for å redusere risikoen for infeksjon                                                        |                                                                |                                                                                                                      |                                                                                            |
| E2. Personlig verneutstyr (f.eks. masker, hansker, frakker) for helsepersonell har blitt distribuert regelmessig i tilstrekkelig antall                                                                                               |                                                                |                                                                                                                      |                                                                                            |
| E3. Et passende antall håndhygienestasjoner (utstyrt med vann, såpe, papirhåndkle eller alkoholløsning) som fungerer og er tilgjengelig for alle helsepersonell, kvinner og deres pårørende, er gjort tilgjengelig.                   |                                                                |                                                                                                                      |                                                                                            |
| E4. Retningslinjer som er tydelige, oppdaterte og basert på internasjonale anbefalinger (f.eks. WHO, FIGO, NICE, RCOG osv.) som er spesifikke for hjelp til kvinner og/eller nyfødte, er gjort tilgjengelig for alt av helsepersonell |                                                                |                                                                                                                      |                                                                                            |
| E5. Utstyr og forsyninger for diagnostisk testing av COVID-19 (dvs. nasopharyngeal vattpinner og reagenser) er tilgjengelig i tilstrekkelige mengder for alle mistenkte tilfeller både for kvinner/nyfødte og helsepersonell          |                                                                |                                                                                                                      |                                                                                            |
| E6. Tilstrekkelig opplæring har blitt gitt til helsepersonell som må utføre prosedyrer pålagt som følge av COVID-19 pandemien (f.eks. smitteforebygging, riktig bruk av personlig verneutstyr osv.)                                   |                                                                |                                                                                                                      |                                                                                            |

Siden begynnelsen av COVID-19 pandemien, inntraff følgende situasjoner på avdelingen der du jobber?

|                                                                                                                                                                                           | 1) Har aldri skjedd | 2) Skjedde under COVID-19 pandemien (enten bare i utvalgte faser eller gjennom hele tidsperioden) | 3) Skjedde uavhengig av COVID-19 pandemien |
|-------------------------------------------------------------------------------------------------------------------------------------------------------------------------------------------|---------------------|---------------------------------------------------------------------------------------------------|--------------------------------------------|
| E7. Nedleggelse av fødeavdelinger og/eller redusert antall rutinemessige tjenester (f.eks. polikliniske besøk, ultralydkontroller) og/eller reduksjon av sengeplasser for kvinner/nyfødte |                     |                                                                                                   |                                            |

|                                                                                                                    |  |  |  |
|--------------------------------------------------------------------------------------------------------------------|--|--|--|
| E8. Ikke tilstrekkelig antall helsepersonell for å kunne gi viktig omsorg til kvinner og nyfødte                   |  |  |  |
| E9. Munnkurv av personalet for å unngå rapportering av utilstrekkelige kliniske og/eller administrative prosedyrer |  |  |  |

E10. Siden begynnelsen av COVID-19 pandemien, har noen av de følgende situasjonene inntruffet på avdelingen der du jobber?

|                                                                                                                                                                                                                                                                              | 1) Har aldri skjedd | 2) Skjedde under COVID-19 pandemien (enten bare i utvalgte faser eller gjennom hele tidsperioden) | 3) Skjedde uavhengig av COVID-19 pandemien |
|------------------------------------------------------------------------------------------------------------------------------------------------------------------------------------------------------------------------------------------------------------------------------|---------------------|---------------------------------------------------------------------------------------------------|--------------------------------------------|
| E10a. Økende medikalisering av fødselsprosessen (dvs. uhenksommessig bruk av oksytocin, økt utførelse av episiotomier, instrumentell fødsel og/eller keisersnitt, osv.)                                                                                                      |                     |                                                                                                   |                                            |
| E10b. Begrensninger for valgt partner/følge under fødsel, uten klare kliniske indikasjoner                                                                                                                                                                                   |                     |                                                                                                   |                                            |
| E10c. Begrensninger i bevegelsesfrihet under fødsel, uten klare kliniske indikasjoner                                                                                                                                                                                        |                     |                                                                                                   |                                            |
| E10d. Begrensninger i smertelindringsalternativer (farmakologisk og ikke-farmakologisk) for alle kvinner som ba om det, i alle faser av fødselen                                                                                                                             |                     |                                                                                                   |                                            |
| E10e. Begrensninger i at mor og barn skal være sammen under hele barseloppholdet, uten klare kliniske indikasjoner                                                                                                                                                           |                     |                                                                                                   |                                            |
| E10f. Begrensninger på amming, uten kliniske indikasjoner (vær oppmerksom på at internasjonale retningslinjer indikerer at kvinner med positiv COVID-19 uten alvorlig sykdom, ikke skal begrense amming)                                                                     |                     |                                                                                                   |                                            |
| E10g. Begrensninger i hud-mot-hud-kontakt den første timen etter fødsel, uten klare kliniske indikasjoner (vær oppmerksom: internasjonale retningslinjer tilsier for tiden at COVID-positivitet uten alvorlig sykdom ikke skal føre til begrensninger i hud-mot-hud kontakt) |                     |                                                                                                   |                                            |

Q5. Her kan du skrive dine forslag og/eller kommentarer for å forbedre beredskapsnivået og håndteringen av COVID-19 pandemien på avdelingen der du jobber.

## F. Endelige betraktninger

F1. Generelt, mener du at avdelingen der du jobber reagerte tilstrekkelig på COVID-19 pandemien?

- 1) Ja, avdelingen reagerte tilstrekkelig
- 2) Ja, men responsen trenger noe forbedring
- 3) Nei, responsen trenger betydelig forbedring

F2. Har ditt arbeidsrelaterte stress endret seg under COVID-19-pandemien?

- 1) Betydelig økt
- 2) Litt økt
- 3) Ikke endret
- 4) Litt redusert
- 5) Betraktelig redusert

F3. Totalt sett, hvor fornøyd er du med jobben din siden pandemien inntraff til nå?

|                      |               |            |            |                   |
|----------------------|---------------|------------|------------|-------------------|
| 1- veldig misfornøyd | 2- misfornøyd | 3- nøytral | 4- fornøyd | 5- veldig fornøyd |
|----------------------|---------------|------------|------------|-------------------|

## G. Sosiodemografiske data

G1. Hvor mange år har du jobbet i helsesektoren for mødre eller nyfødte?

- 1) Mindre enn 5 år
- 2) Mellom 5 og 10 år
- 3) Mer enn 10 år

G2. I hvilket land jobber du? (Velg land)

Liste over 53 land i WHO's europeiske region

Hvis HW besvart fra følgende land, vil et tilleggsspørsmål være tilgjengelig som spesifiserer regionen: Bosnia, Kroatia, Frankrike, Tyskland, Italia, Norge, Portugal, Romania, Serbia, Spania, Sverige, Storbritannia.

G2a. Deltagerne i denne studien er avgrenset til WHO sin europeiske region, som inkluderer 53 land, et område som strekker seg fra Atlanterhavet til Stillehavet.

Hvis du ikke kan finne landet ditt på listen, hvor bor du/kommer du fra? Vennligst spesifiser.

G3. Hvor gammel er du?

- 1) 20-29
- 2) 30-39
- 3) 40-49
- 4) 50-59
- 5) 60-69
- 6) >=70

G4. Hvordan vil du identifisere deg selv?

- 1) Mann
- 2) Kvinne
- 3) Annet
- 4) Egendefinert
- 5) Jeg ønsker ikke å besvare spørsmålet

G5. Dato for utfylling av undersøkelsen (dato-måned-år): \_\_\_\_\_

(\*Dette vil hjelpe oss med å tolke resultatene i lys av de forskjellige fasene av COVID-19 pandemien i hvert land).

~~\*<sup>1</sup>G6. Would you like to receive by email the results of this study once it is finished?~~

~~Data will be treated in accordance with the guidelines for the processing of personal data and your email address will not be disclosed at any stage not shared with others.~~

~~3) Yes (→ G6a)~~

~~4) No~~

~~\*<sup>1</sup>G6a. Your email address will not be linked in any way to the responses of this survey.~~

~~Pursuant to and for the purposes of articles 13 and 23 of Legislative Decree n. 196/2003, by giving my email contact in this form, related to the processing of personal data according to the methods and within the limits set out in the reported in the aforementioned policy:~~

~~"I voluntarily give my contact email to receive results of this survey once it's finished" \_\_\_\_\_~~

G7. Hvordan hørte du om denne studien? (velg alle som gjelder)

- 1) Sosiale media (Facebook / Instagram)
- 2) Søk på internett (f.eks. Google)
- 3) E-post tilsendt fra venn / familie / jobb / kollega
- 4) Jungeltelegraf
- 5) Media
- 6) Annet (spesifiser)

Q6. Her kan du skrive dine forslag for å forbedre kvaliteten på helsetjenester på avdelingen der du jobber og/eller for å forbedre denne undersøkelsen

Ved å trykke på "send inn"-knappen nedenfor, vil du sende inn svarene dine.

Hvis du ønsker å kontakte forskergruppen i ditt land, kan du laste ned filen nedenfor.

**Nå er du er ferdig: takk for at du tok deg tid til å fullføre denne undersøkelsen.  
Vi ønsker deg en fin dag!**

\*<sup>1</sup>For privacy reasons demanded by local ethical committee, this questionnaire version does not have questions G6 and G6a.

## Supplementary Table 11. Final health workers' IMAGINE questionnaire in Swedish

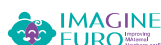

Internationellt projekt

# IMAGINE EURO

(Förbättring av MAternal Newborn carE i den Europeiska regionen)

*Online-undersökning om beredskap, kvalitet och förmåga inom kvinno- och nyföddhetsvården under COVID-19-pandemin i länder i WHO: s Europeiska Region*

*Undersökningen baseras på WHO:s standard för förbättring av kvinno- och nyföddhetsvårdens kvalitet*



## Är du sjukvårdspersonal och arbetar på sjukhus och tillhör en av dem som är direkt involverade i kvinno- och nyföddhetsvården under COVID-19 pandemin?

Delta i studien: din åsikt gör skillnad

Ditt deltagande är frivilligt: Enkäten tar ungefär **15 minuter** att fylla i.

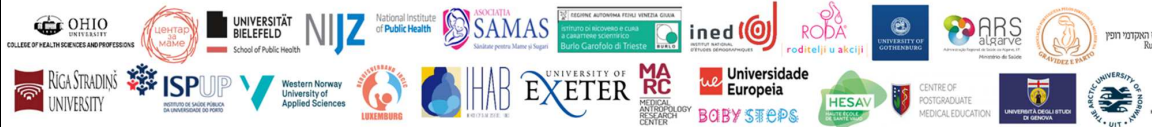

Undersökningen baseras på **WHO:s standard för förbättring av kvinno- och nyföddhetsvårdens kvalitet**

**OBS!** Undersökningen vänder sig till läkare som arbetar i mödra- och nyföddhetsvården, barnmorskor, sjuksköterskor, neonatologer, obstetrik, gynekologer och ST-läkare inom obstetrik, gynekologi och neonatologi

**Vi är måna om din integritet. För att förstå mer om vad studien handlar om, hur data behandlas och tas tillvara, läs det informerade samtycket och sekretesspolicyn som finns i det nedladdningsbara dokumentet på länken nedan \_\_\_\_\_**

**OBS!** Undersökningen vänder sig till läkare som arbetar i mödra- och nyföddhetsvården, barnmorskor, sjuksköterskor, neonatologer, obstetrik, gynekologer och ST-läkare inom obstetrik, gynekologi och neonatologi.

Om du inte tillhör någon av de ovan listade yrkesgrupperna så kan du stänga länken. Tack för intresset för vår forskning.

Om du känner någon som kan delta, dela gärna länken med hen.

Igen, tack så mycket för din tid.

**Genom att ge ditt samtycke till följande fråga, väljer du frivilligt att delta i undersökningen.**

### SAMTYCKE TILL DELTAGANDE:

Jag har läst och förstått samtyckeformuläret på föregående sida, och genom att välja "Ja" nedan, visar jag att jag deltar frivilligt i studien.

- 1) Ja (→S1)
- 2) Nej (the questionnaire can't be filled in → a message will be available to thank them for their interest)

**Om inte:** Deltagandet tar ca 15 minuter. Om du känner någon som skulle vilja delta i studien, vänligen dela länken med dem. Tack för att du tog dig tid! Vi önskar dig en bra dag!



**SCREENING QUESTIONS:****S1. Är du sjukvårdspersonal och har varit direkt involverad i kvinno/nyföddhetsvård under mer än 1 år?**

- 1) Ja (→S2)
- 2) Nej (frågeformuläret kan inte fyllas i → ett meddelande kommer att finnas för att tacka för intresset)

**Om inte:** Tack för intresset för vår forskning. För att delta krävs att du har varit direkt involverad i kvinno- och / eller nyföddhetsvård i mer än 1 år. Om du känner någon annan som har det, vänligen dela länken med dem.

Tack för att du tog dig tid! Vi önskar dig en bra dag!

**S2. Har du varit direkt involverad i kvinno- eller nyföddhetsvården sedan 1 mars 2020?**

- 1) Ja (→ S3)
- 2) Nej (frågeformuläret kan inte fyllas i → ett meddelande kommer att finnas tillgängligt för att tacka för intresset)

**Om nej:** Tack för ditt intresse för vår forskning. För att delta krävs att du har varit direkt involverad i kvinno- och/eller nyföddhetsvården sedan 1 mars 2020. Om du känner någon annan som har det, vänligen dela länken med dem. Tack för att du tog dig tid! Vi önskar dig en bra dag!

**S3. Typ av vårdinrättning för kvinno-/nyföddhetsvård som du arbetar på:**

**Obs:** Om du arbetar på fler än en vårdinrättning för kvinno-/nyföddhetsvård, välj den du kommer att tänka på (när du svarar på frågeformuläret).

- 1) Offentligt sjukhus/klinik för kvinno-/nyföddhetsvård
- 2) Privat sjukhus/klinik för kvinno-/nyföddhetsvård

**S4. Vilken är din yrkesprofession?**

- 1) Allmänläkare som för närvarande arbetar inom förlossnings- eller mödravård (→sektion A-B)
- 2) Allmänläkare som för närvarande arbetar inom nyföddhetsvård (→sektion C-D)
- 3) Barnmorska (→sektion A-B)
- 4) Sjuksköterska i förlossnings eller mödrahälsovård (→avsnitt A-B)
- 5) Sjuksköterska inom nyföddhetsvård (BB, neonatalavdelning eller neonatalintensivvårdsavdelning) (→sektion C-D)
- 6) Neonatolog →sektion C-D)
- 7) Obstetriker/Gynekolog (→sektion A-B)
- 8) ST-läkare inom obstetrik/gynekologi (→sektion A-B)
- 9) ST-läkare inom neonatologi

**S4a. Inom vilket område arbetar du huvudsakligen?**

- 1) För närvarande arbetar jag främst inom förlossningsvården (t.ex. på en förlossningsavdelning)
- 2) För närvarande arbetar jag främst inom nyföddhetsvården (d.v.s. på en neonatal- eller BB-avdelning)
- 3) Jag arbetar inom båda områdena

**Förlossningsvård (Sektion A-Sektion B)**

- I. Respekteras det **naturliga förloppet**, att friska gravida kvinnor får föda med spontant värkarbete på den enhet/avdelning där du arbetar:

|  |      |                       |                    |
|--|------|-----------------------|--------------------|
|  | 1)Ja | 2)Ja, men den behöver | 3)Nej, det behöver |
|--|------|-----------------------|--------------------|

|                                                                                                                                                                                          |  | förbättras något | förbättras avsevärt |
|------------------------------------------------------------------------------------------------------------------------------------------------------------------------------------------|--|------------------|---------------------|
| A1. Finns det en tillfredsställande infrastruktur (dvs tillgång till vatten och avlopp, el, förlossningsrum och är dessa utrymmen logiskt utformade för att främja kontinuitet i vården) |  |                  |                     |
| A2. Adekvat förråd av utrustning för att kunna ge nödvändig vård finns alltid.                                                                                                           |  |                  |                     |
| A3. Det tillhandahålls uppdaterade dokument/ PM med kliniska riktlinjer för vård av friska gravida kvinnor som är evidensbaserade (bygger på vetenskapligt underlag)                     |  |                  |                     |
| A4. Organisationen stödjer och tillhandahåller handledning                                                                                                                               |  |                  |                     |

|                                                                                                                                      | 1)Ja | 2)Ja, men den behöver förbättras något | 3)Nej, det behöver förbättras avsevärt |
|--------------------------------------------------------------------------------------------------------------------------------------|------|----------------------------------------|----------------------------------------|
| A5. Har du minst en gång under de senaste tre åren deltagit i effektiv och specifik träning för att stärka/öka dina färdigheter..... |      |                                        |                                        |
| A5.1 i användandet av partogram?                                                                                                     |      |                                        |                                        |
| A5.2. i fosterhjärtljudsövervakning (t.ex. intermittent fosterhjärtfrekvensauskultation under förlossningen och /eller CTG-tolkning) |      |                                        |                                        |
| A5.3 om hur onödiga kejsarsnitt undviks (d.v.s. klinisk färdighetsträning i förlossning, om indikationer för kejsarsnitt)            |      |                                        |                                        |

- J. När det gäller de **allvarligaste obstetriska nödsituationerna** (t.ex. postpartumblödning, eklampsi, skulderdystosi, hjärtstopp hos en gravid kvinna, etc.) på den kvinno- och nyföddhetsavdelningen där du arbetar:

|                                                                                                                                                                                                                 | 1)Ja | 2)Ja, men den behöver förbättras något | 3)Nej, det behöver förbättras avsevärt |
|-----------------------------------------------------------------------------------------------------------------------------------------------------------------------------------------------------------------|------|----------------------------------------|----------------------------------------|
| B1. Tillräcklig fysisk infrastruktur finns (dvs. vatten, avlopp och el, samt adekvat utrustade platser för att bedriva nödvändig akutvård)                                                                      |      |                                        |                                        |
| B2. Adekvat förråd av utrustning för att kunna ge nödvändig vård finns alltid.                                                                                                                                  |      |                                        |                                        |
| B3. Det tillhandahålls uppdaterade dokument/ PM med kliniska riktlinjer för vård vid obstetriska akutsituationer, som är evidensbaserade (bygger på vetenskapligt underlag)                                     |      |                                        |                                        |
| B4. Arbetsplatsen tillhandahåller effektiv handledning för att stödja och förbättra personliga praktiska färdigheter                                                                                            |      |                                        |                                        |
| B5. Vid behov av förflyttning finns ett effektivt och funktionellt och kvalitetssäkert system för hänvisningar och transporter (dvs. säkert, tillgängligt utan dröjsmål 24 timmar om dygnet, under hela veckan) |      |                                        |                                        |

|                                                                                                                                      | 1)Ja | 2)Ja, men den | 3)Nej, det behöver |
|--------------------------------------------------------------------------------------------------------------------------------------|------|---------------|--------------------|
| B6. Har du minst en gång under de senaste tre åren deltagit i effektiv och specifik träning för att stärka/öka dina färdigheter..... |      |               |                    |

|                                                               |  | behöver<br>förbättras<br>något | förbättras<br>avsevärt |
|---------------------------------------------------------------|--|--------------------------------|------------------------|
| B6.1 om handläggning av postpartumblödning?                   |  |                                |                        |
| B6.2 om handläggning av eklampsi?                             |  |                                |                        |
| B6.3 om handläggning av skulderdystosi?                       |  |                                |                        |
| B6.4 in om handläggning av hjärtinfarkt hos en gravid kvinna? |  |                                |                        |

## Neonatalvård (Sektion A- Sektion B)

A. När det gäller vården av ett **friskt nyfött barn** där du arbetar:

|                                                                                                                                                                          | 1)Ja | 2)Ja, men<br>den<br>behöver<br>förbättras<br>något | 3)Nej, det<br>behöver<br>förbättras<br>avsevärt |
|--------------------------------------------------------------------------------------------------------------------------------------------------------------------------|------|----------------------------------------------------|-------------------------------------------------|
| A1. Tillräcklig fysisk infrastruktur finns (dvs. vatten, avlopp och el, samt adekvat utrustade platser för att upprätthålla kontinuitet i vården av friska nyfödda barn) |      |                                                    |                                                 |
| A2. Adekvat förråd av utrustning för att kunna ge nödvändig vård finns alltid.                                                                                           |      |                                                    |                                                 |
| A3. Det tillhandahålls uppdaterade evidensbaserade dokument/ PM med kliniska riktlinjer för vård av friska nyfödda (som bygger på vetenskapligt underlag)                |      |                                                    |                                                 |
| A4. Arbetsplatsen tillhandahåller effektiv handledning för att stödja och förbättra personliga praktiska färdigheter                                                     |      |                                                    |                                                 |

|                                                                                                                                      | 1)Ja | 2)Ja, men<br>den<br>behöver<br>förbättras<br>något | 3)Nej, det<br>behöver<br>förbättras<br>avsevärt |
|--------------------------------------------------------------------------------------------------------------------------------------|------|----------------------------------------------------|-------------------------------------------------|
| A5. Har du minst en gång under de senaste tre åren deltagit i effektiv och specifik träning för att stärka/öka dina färdigheter..... |      |                                                    |                                                 |
| A5.1 om att främja amning, ge stöd och råd?                                                                                          |      |                                                    |                                                 |
| A5.2 om att främja hud-mot-hud och hur den nyfödda hålls varm?                                                                       |      |                                                    |                                                 |
| A5.3 om standardåtgärder (d.v.s. avnavling, immunisering och i att upptäcka allvarliga tecken på komplikationer)?                    |      |                                                    |                                                 |

B. När det gäller de **allvarligaste neonatala nödsituationerna** (t.ex. mekoniumfärgat fostervatten, prematuritet, tillväxthämning eller låg födelsevikt, misstänkt neonatal sepsis) på enheten där du arbetar (förlossning, bb eller neonatalavdelning):

|  | 1)Ja | 2)Ja, men<br>den<br>behöver<br>förbättras<br>något | 3)Nej, det<br>behöver<br>förbättras<br>avsevärt |
|--|------|----------------------------------------------------|-------------------------------------------------|
|  |      |                                                    |                                                 |

|                                                                                                                                                                                                                 |      |                                        |                                        |
|-----------------------------------------------------------------------------------------------------------------------------------------------------------------------------------------------------------------|------|----------------------------------------|----------------------------------------|
| B1. Tillräcklig fysisk infrastruktur finns (dvs. vatten, avlopp och el, samt adekvat utrustade platser för att bedriva nödvändig akutvård till sjuka nyfödda barn)                                              |      |                                        |                                        |
| B2. Adekvat förråd av utrustning för att kunna ge nödvändig vård finns alltid.                                                                                                                                  |      |                                        |                                        |
| B3. Det tillhandahålls uppdaterade dokument/ PM med kliniska riktlinjer för vård vid neonatala akutsituationer, som är evidensbaserade (bygger på vetenskapligt underlag)                                       |      |                                        |                                        |
| B4. Arbetsplatsen tillhandahåller effektiv handledning för att stödja och förbättra personliga praktiska färdigheter                                                                                            |      |                                        |                                        |
| B5. Vid behov av förflyttning finns ett effektivt och funktionellt och kvalitetssäkert system för hänvisningar och transporter (dvs. säkert, tillgängligt utan dröjsmål 24 timmar om dygnet, under hela veckan) |      |                                        |                                        |
| B6. Har du minst en gång under de senaste tre åren deltagit i effektiv och specifik träning för att stärka/öka dina färdigheter.....                                                                            | 1)Ja | 2)Ja, men den behöver förbättras något | 3)Nej, det behöver förbättras avsevärt |
| Om återupplivning av det nyfödda barnet?                                                                                                                                                                        |      |                                        |                                        |

**Observera**, det är olika frågor i de 3?; barnmorskor som arbetar i mödra/nyföddhetsområdet, operators? inom mödra/nyföddhetsområdet.

För vårdpersonal som arbetar inom **mödraområdet**:

**Q1. Vänligen ge förslag och/eller kommentarer för att förbättra vården av friska gravida kvinnor och de allvarligaste akuta obstetriska komplikationerna.**

För vårdpersonal som arbetar inom **neonatalområdet**:

**Q1. Vänligen ge förslag och/eller kommentarer för att förbättra vården för av friska nyfödda barn och rutiner vid de allvarligaste akuta neonatala komplikationerna.**

För barnmorskor som arbetar inom både **mödra- och neonatalområdet**:

**Q1. Vänligen ge förslag för att förbättra vården av friska gravida kvinnor och nyfödda barn samt ge förslag på förbättringar av rutiner vid obstetriska och neonatala nödsituationer.**

## C. Arbetsorganisation, datahantering och kommunikation

När det gäller **arbetsorganisationen**, i kvinno- och nyföddhetsvården där du arbetar:

|                                                                                                                                                                                                  | 1)Ja | 2)Ja, men den behöver förbättras något | 3)Nej, det behöver förbättras avsevärt |
|--------------------------------------------------------------------------------------------------------------------------------------------------------------------------------------------------|------|----------------------------------------|----------------------------------------|
| C1. Det finns tillräckligt med vårdpersonal för att säkerställa adekvat vård                                                                                                                     |      |                                        |                                        |
| C2. Rollerna och ansvarsområdena för varje vårdpersonal är tydligt beskrivna och definierade                                                                                                     |      |                                        |                                        |
| C3. Överlämning mellan personal vid skiftbyte sker på ett effektivt och relevant sätt där alla aspekter av vården säkerställs och hänsyn tas till konfidentialitet vid informationsöverflyttning |      |                                        |                                        |

Vad gäller inhämtning och **registrering av journaldata och dess hantering**, vid din arbetsplats i kvinno- eller nyföddhetsvård:

|                                                                                                                                                                                                                                                                                                                                                                         | 1)Ja | 2)Ja, men den behöver förbättras något | 3)Nej, det behöver förbättras avsevärt |
|-------------------------------------------------------------------------------------------------------------------------------------------------------------------------------------------------------------------------------------------------------------------------------------------------------------------------------------------------------------------------|------|----------------------------------------|----------------------------------------|
| C4. Det finns ett kliniskt journalsystem (dvs pappers eller dataregister) som är komplett, korrekt, pålitligt och lätt att hantera                                                                                                                                                                                                                                      |      |                                        |                                        |
| C5. Det finns en förbestämd variabellista som mäter vårdkvalitet (t.ex. förekomst och frekvens av följande utfall: sectio med Robson klassifikation, epistomier, Kristellers manöver (bukpress), induktioner, amning, hud-mot-hud, kängurumetoden m.m.), som används för att sammanställa statistiska rapporter som regelbundet delas och diskuteras i personalgruppen. |      |                                        |                                        |

Vad gäller **kommunikation**, vid din arbetsplats i kvinno- eller nyföddhetsvård:

|                                                                                                                                                                                                                                                                      | 1)Ja | 2)Ja, men den behöver förbättras något | 3)Nej, det behöver förbättras avsevärt |
|----------------------------------------------------------------------------------------------------------------------------------------------------------------------------------------------------------------------------------------------------------------------|------|----------------------------------------|----------------------------------------|
| C6. I allmänhet har hälso- och sjukvårdspersonal en effektiv kommunikation med kvinnor och familjer (t.ex. de ser till att de förstår och / eller ger dem möjlighet att ställa frågor och fritt uttrycka sina åsikter) på ett enkelt och kulturellt godtagbart språk |      |                                        |                                        |
| C7. Tydligt utformat informationsmaterial angående hälsa hos mödrar och nyfödda är lättillgängligt (i skriftlig, digital eller bildform) och tillhandahålls på samtliga språk som talas lokalt                                                                       |      |                                        |                                        |
| C8. Du har deltagit i (effektiv och) specifik träning för att stärka dina färdigheter i interpersonell kommunikation och rådgivning (det har funnits minst ett träningstillfälle de senaste tre åren för var och en av följande aktiviteter)                         |      |                                        |                                        |

Q2. Vänligen ge förslag och / eller kommentarer för att förbättra arbetsorganisationen, datainsamlingen och kommunikation.

## D. Kvalitet och utförande av vård

Vad gäller **emotionellt stöd, psykologiskt stöd och beslutsstöd**, vid din arbetsplats i kvinno- eller nyföddhetsvård:

|                                                                                                                                                                                                                                                                                                                                                                                                                                                                                                                                                                                                                                                                                                   | 1)Ja | 2)Ja, men den behöver förbättras något | 3)Nej, det behöver förbättras avsevärt |
|---------------------------------------------------------------------------------------------------------------------------------------------------------------------------------------------------------------------------------------------------------------------------------------------------------------------------------------------------------------------------------------------------------------------------------------------------------------------------------------------------------------------------------------------------------------------------------------------------------------------------------------------------------------------------------------------------|------|----------------------------------------|----------------------------------------|
| D1. Det finns möjlighet för alla kvinnor att ha en egen vald följeslagare så länge de själva anser det nödvändigt (dvs. under alla faser av förlossningen och postpartumperioden)                                                                                                                                                                                                                                                                                                                                                                                                                                                                                                                 |      |                                        |                                        |
| D2. Du har deltagit i (effektiv och) specifik träning för att förbättra dina färdigheter i att stärka och ge kvinnor känslomässigt stöd under och efter förlossningen (dvs att förstå emotionellt status effekter på oxytocinfrisättning och praktiska metoder för att kunna hantera känslor (vid minst ett träningstillfälle de senaste tre åren) Du har deltagit i (effektiv och) specifik träning för att förbättra dina färdigheter i att stärka och ge kvinnor känslomässigt stöd under och efter förlossningen (dvs att förstå emotionellt status effekter på oxytocinfrisättning och praktiska metoder för att kunna hantera känslor (vid minst ett träningstillfälle de senaste tre åren) |      |                                        |                                        |

Vad gäller **skydd av kvinnors integritet**, vid din arbetsplats i kvinno- eller nyföddhetsvård:

|                                                                                                                                                                                                                              | 1)Ja | 2)Ja, men den behöver förbättras något | 3)Nej, det behöver förbättras avsevärt |
|------------------------------------------------------------------------------------------------------------------------------------------------------------------------------------------------------------------------------|------|----------------------------------------|----------------------------------------|
| D3. Tillräcklig infrastruktur finns för att skydda kvinnors och deras familjers integritet (t.ex. privata rum för besök, tillgänglighet av gardiner eller rumsavdelare mellan salssängar, adekvat antal sängar per rum m.m.) |      |                                        |                                        |
| D4. Alla nödvändiga åtgärder för att garantera kvinnors och deras familjers integritet och konfidentialitet vidtas (t.ex. diskuteras privat information på ett sätt så att andra inte kan höra osv.)                         |      |                                        |                                        |

Q3. Vänligen ge förslag och / eller kommentarer för att förbättra emotionellt stöd, psykologiskt stöd och självbestämmande, beslutsstöd samt åtgärder för att bevara kvinnors integritet.

**Observera:** det finns två olika versioner av fråga D5.1 för de tre möjliga frågeformulärvägarna; barnmorskor som arbetar inom både mödra- och neonatalområdet bör svara på båda versionerna.

Vad gäller kvinnors rätt **till ett informerat val**, vid din arbetsplats i kvinno- eller nyföddhetsvård:

För vårdpersonal som arbetar inom **mödraområdet**:

|                                                                                                                                                                                                                       |      |                                        |                                        |
|-----------------------------------------------------------------------------------------------------------------------------------------------------------------------------------------------------------------------|------|----------------------------------------|----------------------------------------|
| D51. Finns det PM eller annat skriftligt material (kan vara digitalt) som utförligt beskriver fördelar och risker med följande obstetriska åtgärder, som vårdpersonal kan använda sig av för att informera kvinnorna: | 1)Ja | 2)Ja, men den behöver förbättras något | 3)Nej, det behöver förbättras avsevärt |
| a) Kejsarsnitt                                                                                                                                                                                                        |      |                                        |                                        |
| b) Igångsättning av förlossning                                                                                                                                                                                       |      |                                        |                                        |

För vårdpersonal som arbetar inom **neonatalområdet**:

|                                                                                                                                                                                                                    |      |                                        |                                        |
|--------------------------------------------------------------------------------------------------------------------------------------------------------------------------------------------------------------------|------|----------------------------------------|----------------------------------------|
| D5.1. Finns det PM eller annat skriftligt material (kan vara digitalt) som utförligt beskriver fördelar och risker med följande neonatala åtgärd, som vårdpersonal kan använda sig av för att informera kvinnorna: | 1)Ja | 2)Ja, men den behöver förbättras något | 3)Nej, det behöver förbättras avsevärt |
| a) PKU-provtagning                                                                                                                                                                                                 |      |                                        |                                        |

Vad gäller kvinnors **rätt till ett informerat val**, vid din arbetsplats i kvinno- eller nyföddhetsvård::

|                                                                                                                                                                                                                                                         |      |                                        |                                        |
|---------------------------------------------------------------------------------------------------------------------------------------------------------------------------------------------------------------------------------------------------------|------|----------------------------------------|----------------------------------------|
|                                                                                                                                                                                                                                                         | 1)Ja | 2)Ja, men den behöver förbättras något | 3)Nej, det behöver förbättras avsevärt |
| D5.2. Regelbundna informationsmöten ges under graviditeten som syftar till att bättre informera kvinnorna om procedurer som kräver samtycke                                                                                                             |      |                                        |                                        |
| D6. Du har deltagit i (effektiv och) specifik träning för att stärka dina färdigheter i att på ett korrekt sätt informera till informerade val gällande huvudförfaranden relaterade till barnafödande (minst ett träningstillfälle de senaste tre åren) |      |                                        |                                        |

Vad gäller övriga aspekter **av vårdkvalitet**, vid din arbetsplats i kvinno- eller nyföddhetsvård:

|                                                                                                                                                                                                                                                                 |      |                                        |                                        |
|-----------------------------------------------------------------------------------------------------------------------------------------------------------------------------------------------------------------------------------------------------------------|------|----------------------------------------|----------------------------------------|
|                                                                                                                                                                                                                                                                 | 1)Ja | 2)Ja, men den behöver förbättras något | 3)Nej, det behöver förbättras avsevärt |
| D7. Det finns en speciellt sammansatt grupp vid din arbetsplats som arbetar specifikt med förbättra vårdkvaliteten                                                                                                                                              |      |                                        |                                        |
| D8. Regelbundna möten, minst en gång per vecka, organiseras för all sjukvårdspersonal, där de mest relevanta kliniska fallen diskuteras                                                                                                                         |      |                                        |                                        |
| D9. I händelse av mödra- och / eller neonatala dödsfall organiseras öppna och konstruktiva möten / audits, där all kliniskt aktiv sjukvårdspersonal bjuds in, för att gemensamt analysera fallet och komma överens om åtgärder för att förbättra vårdkvaliteten |      |                                        |                                        |
| D10. Du har deltagit i (effektiv och) specifik träning för att stärka dina färdigheter i kvinnors och nyföddas rättigheter vid din                                                                                                                              |      |                                        |                                        |

|                                                                                                                                                                                                                                                                      |  |  |  |
|----------------------------------------------------------------------------------------------------------------------------------------------------------------------------------------------------------------------------------------------------------------------|--|--|--|
| vårdenhet under förlossningen eller den postnatalaperioden (minst ett träningstillfälle de senaste tre åren)                                                                                                                                                         |  |  |  |
| D11. Du har deltagit i (effektiv och) specifik träning (workshop) om smärtlindring till födande kvinnor (både farmakologisk och icke-farmakologisk) och/ eller prevention av smärta/smärtlindring för nyfödda barn (minst ett träningstillfälle de senaste tre åren) |  |  |  |

Q4. Vänligen ge förslag och / eller kommentarer som kan förbättra kvinnors rättigheter till ett välinformerat val och andra aspekter av vårdkvalitet.

|  |
|--|
|  |
|--|

## E. COVID-19: Beredskap och åtgärder

Sedan början av COVID-19-pandemin, **var beredskapsnivån inom kvinno- och nyföddhetsvården inom** nedanstående område/avdelningen där du arbetar:

|                                                                                                                                                                                                                                        | 1) Har alltid funnits och / eller varit adekvat sedan början av pandemin | 2) Har inte alltid funnits och / eller inte varit helt adekvat (t.ex. saknades under de första faserna av pandemin) | 3) Har aldrig funnits och / eller aldrig varit adekvat sedan pandemin började fram till nu |
|----------------------------------------------------------------------------------------------------------------------------------------------------------------------------------------------------------------------------------------|--------------------------------------------------------------------------|---------------------------------------------------------------------------------------------------------------------|--------------------------------------------------------------------------------------------|
| E1. Ett särskilt spår i kvinno- och nyföddhetsvården för patienter med misstänkt / bekräftad COVID-19 har etablerats för att minska risken för infektion                                                                               |                                                                          |                                                                                                                     |                                                                                            |
| E2. Personlig skyddsutrustning för vårdpersonal (t.ex. masker, handskar, kläder) har regelbundet distribuerats i tillräckligt antal                                                                                                    |                                                                          |                                                                                                                     |                                                                                            |
| E3. Ett lämpligt antal fungerande handhygienstationer (utrustade med vatten, tvål, pappershanddukar eller handsprit) finns för all vårdpersonal, kvinnorna och deras närstående.                                                       |                                                                          |                                                                                                                     |                                                                                            |
| E4. All sjukvårdspersonal har tillgång till tydliga och uppdaterade riktlinjer, baserade på internationella rekommendationer (t.ex. WHO, FIGO, NICE, RCOG etc.) specifikt framtagna för att hjälpa kvinnor och / eller nyfödda         |                                                                          |                                                                                                                     |                                                                                            |
| E5. Utrustning och förnödenheter för diagnostisk testning av COVID-19 (dvs. nasofaryngeala provpinnar och reagenser) finns tillgängliga i tillräckliga mängder för alla misstänkta fall bland kvinnor / nyfödda och sjukvårdspersonal. |                                                                          |                                                                                                                     |                                                                                            |
| E6. All personal har fått tillgång till adekvat utbildning angående viktiga procedurer i relation till COVID-19-pandemin (t.ex. förebyggande av smittspridning, adekvat användning av personlig skyddsutrustning, m.m.).               |                                                                          |                                                                                                                     |                                                                                            |



Har du upplevt någon av nedanstående situationer i kvinno- eller nyföddhetsvården där du arbetar, sedan början av COVID-19-pandemin?

|                                                                                                                                                                                                                             | 1) Har aldrig hänt | 2) Har inträffat under COVID-19-pandemin (i enstaka situationer eller vid alla nämnda situationer) antingen endast i utvalda faser eller hela tiden) | 3) Inträffade oberoende av COVID-19-pandemin |
|-----------------------------------------------------------------------------------------------------------------------------------------------------------------------------------------------------------------------------|--------------------|------------------------------------------------------------------------------------------------------------------------------------------------------|----------------------------------------------|
| E7. Stängning av förlossningsavdelningar och / eller neddragning av mängden rutinmässiga tjänster (t.ex. öppenvårdsbesök, ultraljudskontroller, dagvård) och / eller nedstängning av sängplatser för kvinnor eller nyfödda. |                    |                                                                                                                                                      |                                              |
| E8. Otillräckligt antal sjukvårdspersonal för att kunna ge nödvändig kvinno- och nyföddhetsvård.                                                                                                                            |                    |                                                                                                                                                      |                                              |
| E9. Uppmaning till personalen att inte rapportera inadekvata kliniska och / eller administrativa procedurer/förfaranden (censurering)                                                                                       |                    |                                                                                                                                                      |                                              |

E10. Har någon av följande situationer någonsin förekommit i kvinno- och nyföddhetsvården där du arbetar?

|                                                                                                                                                                             | 1) Har aldrig hänt | 2) Har inträffat under COVID-19-pandemin (i enstaka situationer eller vid alla nämnda situationer) antingen endast i utvalda faser eller hela tiden) | 3) Inträffade oberoende av COVID-19-pandemin |
|-----------------------------------------------------------------------------------------------------------------------------------------------------------------------------|--------------------|------------------------------------------------------------------------------------------------------------------------------------------------------|----------------------------------------------|
| E10a. Ökad medikalisering av förlossningen/födandet (d.v.s. olämplig användning av oxytocin, ökad andel episiotomier, operativa förlossningar och / eller kejsarsnitt etc.) |                    |                                                                                                                                                      |                                              |
| E10b. Begränsningar av följeslagare utan tydliga kliniska orsaker                                                                                                           |                    |                                                                                                                                                      |                                              |
| E10c. Begränsningar av att kunna vara i rörelse under förlossningen trots avsaknad av tydliga kliniska orsaker                                                              |                    |                                                                                                                                                      |                                              |
| E10d. Begränsningar av smärtlindringsalternativ för alla kvinnor som önskar dessa under alla faser av förlossningen (farmakologiska och icke-farmakologiska)                |                    |                                                                                                                                                      |                                              |

|                                                                                                                                                                                                                                                                                                                 |  |  |  |
|-----------------------------------------------------------------------------------------------------------------------------------------------------------------------------------------------------------------------------------------------------------------------------------------------------------------|--|--|--|
| E10e. Begränsningar av rooming-in utan tydliga kliniska indikationer                                                                                                                                                                                                                                            |  |  |  |
| E10f. Begränsningar i amning, utan särskilda kliniska skäl (notera: internationella riktlinjer indikerar för närvarande inte att positiv COVID-19 som inte innebär allvarlig sjukdom är ett skäl för att begränsa amning)                                                                                       |  |  |  |
| E10g. Begränsning av hud-mot-hud-kontakt under den första timmen efter förlossningen utan att det finns särskilda skäl (observera: för närvarande saknas internationella riktlinjer som indikerar att COVID-19 utan allvarlig sjukdom är en säkerställd klinisk indikation för att begränsa hud-mot-hudkontakt) |  |  |  |

Q5. Vänligen ge förslag och / eller kommentarer för att förbättra beredskapen och responsen i kvinno- och nyföddhetsvården på din arbetsplats under COVID-19-pandemin.

|  |
|--|
|  |
|--|

## F. Slutgiltiga överväganden

F1. Sammantaget, tror du att din enhet där du arbetar anpassade sig på ett adekvat sätt till COVID-19-pandemin?

- 1) Ja, kvinno- och nyföddhetsvården – anpassade sig på ett adekvat sätt
- 2) Ja, men anpassningen behöver förbättras ytterligare
- 3) Nej, anpassningen behöver förbättras avsevärt

F2. Har din arbetsrelaterade stressnivå förändrats under COVID-19-pandemin?

- 1) Ökat markant
- 2) Ökat något
- 3) Ingen förändring
- 4) Minskat något
- 5) Minskat markant

F3. Sammantaget, hur nöjd är du med ditt arbete under pandemin fram till idag?

|                    |             |            |         |               |
|--------------------|-------------|------------|---------|---------------|
| 1- mycket missnöjd | 2- missnöjd | 3- neutral | 4- nöjd | 5-mycket nöjd |
|--------------------|-------------|------------|---------|---------------|

## G. Sociodemografiska data

G1. Hur många år har du arbetat i kvinno-nyföddhetsvård?

- 1) Mindre än 5 år
- 2) Mellan 5 och 10 år
- 3) Mer än 10 år

G2. I vilket land arbetar du? (Vänligen välj land)

Lista över 53 WHO-europeiska regioner.

Om HW svarade från följande länder kommer en ytterligare fråga att specificera regionen: Bosnien, Kroatien, Frankrike, Tyskland, Italien, Norge, Portugal, Rumänien, Serbien, Spanien, Sverige, Storbritannien.

G2a. Denna forskningsstudie genomförs endast i WHO:s Europeiska region, vilken inkluderar 53 länder och täcker in en stor geografisk region som sträcker sig från Atlanten till Stilla havet. Om du inte hittar ditt land i listan, var snäll och uppge landet här: \_\_\_\_\_

G3. Hur gammal är du?

- 1) 20-29
- 2) 30-39
- 3) 40-49
- 4) 50-59
- 5) 60-69
- 6) >=70

G4. Hur skulle du beskriva din könstillhörighet?

- 1) Man
- 2) Kvinna
- 3) Annan
- 4) Föredrar att beskriva mig själv som icke-binär / gender-fluid/ agender
- 5) Jag föredrar att inte svara

G5. Datum för ifyllande av undersökningen (dag-månad-år): \_\_\_\_\_

Detta hjälper oss att tolka resultaten mot bakgrund av de olika faserna av COVID-19-pandemin i varje land.

~~\*1G6. Would you like to receive by email the results of this study once it is finished?~~

~~Data will be treated in accordance with the guidelines for the processing of personal data and your email address will not be disclosed at any stage not shared with others.~~

- ~~5) Yes (→G6a)~~  
~~6) No~~

~~\*1G6a. Your email address will not be linked in any way to the responses of this survey.~~

~~Pursuant to and for the purposes of articles 13 and 23 of Legislative Decree n. 196/2003, by giving my email contact in this form, related to the processing of personal data according to the methods and within the limits set out in the reported in the aforementioned policy:~~

~~"I voluntarily give my contact email to receive results of this survey once it's finished" \_\_\_\_\_~~

G7. Hur fick du höra om den här studien? (Välj allt som passar in)

- 1) Sociala medier som du deltar på (Facebook / Instagram)
- 2) Sökning via Internet (t.ex. Google)
- 3) Fick e-post från en vän/familj/arbete/kollega
- 4) Mun till mun
- 5) Tryck på (t.ex. radio, tryckta medier, TV)
- 6) Annat (var vänlig specificera vad)

Q6. Vänligen ge oss förslag för att förbättra kvaliteten av kvinno- och nyföddhetsvården där du arbetar och / eller förslag för att förbättra denna undersökning.

**Genom att trycka på knappen "Skicka" nedan kommer du att sända in dina svar.  
Om du vill kontakta forskargruppen i ditt land, vänligen ladda upp filen nedan.**

**Du är klar: tack för att du tog dig tid att slutföra undersökningen.**

**Vi önskar dig en bra dag!**

\*<sup>1</sup> For privacy reasons demanded by local ethical committee, this questionnaire version does not have questions G6 and G6a.

## Supplementary Table 12. Final health workers' IMAGINE questionnaire in Croatian

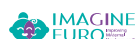

Međunarodni projekt

# IMAGINE EURO

(Poboljšanja u skrbi za majke i novorođenčadi u Europi)

*Internetsko istraživanje o spremnosti, kvaliteti i otpornosti zdravstvene zaštite majki i novorođenčadi među zemljama Europske regije SZO tijekom pandemije COVID-19*

*Istraživanje se temelji na standardima SZO za poboljšanje kvalitete zdravstvene zaštite majki i novorođenčadi u zdravstvenim ustanovama.*

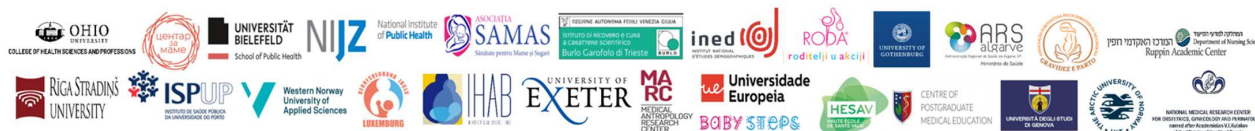

## Jeste li zdravstveni djelatnik koji je izravno uključen u pružanje skrbi majki i novorođenčadi na razini ustanove (bolnica) tijekom pandemije COVID-19?

**Sudjelujte u istraživanju: Vaše mišljenje je važno!**

Vaše je sudjelovanje dobrovoljno: popunjavanje upitnika traje otprilike **15 minuta**.

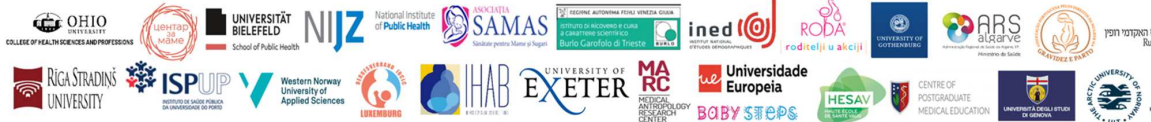

Istraživanje se temelji na Standardi SZO za poboljšanje skrbi trudnica, roditelja, babinjača i novorođenčadi u zdravstvenim ustanovama.

**Važna napomena:** Upitnik je namijenjen specijalistima i specijalizantima ginekologije, porodništva te neonatologije, primaljama i medicinskim sestrama koje trenutno rade u području zdravstvene zaštite trudnica, roditelja, babinjača i novorođenčadi.

### Vaša privatnost je važna.

Da biste razumjeli više o istraživanju, obradi prikupljenih podataka i kako se upravlja podacima, pročitajte dokumente Informirana suglasnost i Politika privatnosti, koje možete preuzeti na poveznici niže.

Važna napomena: Upitnik je namijenjen specijalistima i specijalizantima ginekologije, porodništva te neonatologije, primaljama i medicinskim sestrama koje trenutno rade u području zdravstvene skrbi trudnica, roditelja, babinjača i novorođenčadi.

Ako ne pripadate u gore navedenu skupinu zdravstvenih djelatnika, molimo vas da zatvorite ovaj upitnik.

U svakom slučaju, hvala vam na ukazanom interesu za naše istraživanje.

Ako znate nekoga tko može sudjelovati, molimo vas da im prosljedite poveznicu na ovo istraživanje.

Još jednom, hvala vam na izdvojenom vremenu.

Davanjem suglasnosti za sljedeće pitanje dobrovoljno pristajete na sudjelovanje u istraživanju.

### PRISTANAK NA SUDJELOVANJE:

Pročitao/la sam i razumio/la obrazac za pristanak na prethodnoj stranici, te odabirom opcije "Da" pristajem dobrovoljno sudjelovati u istraživanju.

1) Da (→S1)

2) Ne (upitnik se ne može ispuniti → bit će dostupna poruka da im se zahvalimo na interesu)

**Ako ne:** Sudjelovanje traje otprilike 15 minuta. Ukoliko želite, možete podijeliti poveznicu za pristupanje ovom istraživanju kolegama za koje smatrate da bi bili voljni sudjelovati. Hvala na vašem vremenu!!

**PITANJE probira:**

**S1. Jeste li zdravstveni djelatnik koji je izravno uključen u pružanje maternalne (skrb za trudnice, roditelje, babinjače) i/ili neonatalne skrbi u bolničkoj ustanovi sa više od godine rada radnog iskustva?**

- 1) Da (→S2)
- 2) Ne (upitnik se ne može ispuniti → bit će dostupna poruka da im se zahvalimo na interesu)

**If NO:** Zahvaljujemo na interesu za naše istraživanje. Za sudjelovanje je potrebno da ste izravno uključeni u pružanje bolničke skrbi za trudnice, roditelje, babinjače i/ili novorođenčadi više od 1 godine.

Ukoliko želite, možete podijeliti poveznicu za pristupanje ovom istraživanju kolegama koji odgovaraju opisu sudionika. Hvala na vašem vremenu! Ugodan ostatak dana!

**S2. Jeste li bili izravno uključeni u pružanje skrbi za trudnice, roditelje, babinjače i/ili novorođenčad u bolnicama od 1. ožujka 2020. do danas?**

- 1) Da (→ S3)
- 2) Ne (upitnik se ne može ispuniti → bit će dostupna poruka da im se zahvalimo na interesu)

**If NO:** Zahvaljujemo na interesu za naše istraživanje. Da biste sudjelovali, potrebno je da ste bili izravno uključeni u bolničkoj skrbi za trudnice, roditelje, babinjače i/ili novorođenčadi za vrijeme pandemije, odnosno od 1. ožujka 2020. do danas. Ukoliko želite, možete podijeliti poveznicu za pristupanje ovom istraživanju kolegama koji odgovaraju opisu sudionika. Hvala na vašem vremenu! Ugodan ostatak dana!

**S3. Vrsta ustanove za pružanje skrbi majkama / novorođenčadi u kojoj radite:**

**Napomena:** Ako radite u više ustanova, odaberite jednu i odgovorite na sva pitanja za rad u o toj ustanovi.

- 1) Javna ustanova koja pruža skrb trudnicama, roditeljama, babinjačama i/ili novorođenčadi
- 2) Privatna ustanova koja pruža skrb trudnicama, roditeljama, babinjačama i/ili novorođenčadi

**S4. Što ste po zanimanju?**

- 1) Liječnik opće medicine koji trenutno radi u području maternalne zdravstvene zaštite (→odjeljak AB)
- 2) Liječnik opće medicine koji trenutno radi u području neonatološke zdravstvene zaštite (→odjeljak CD)
- 3) Primalja (→odjeljak AB)
- 4) Medicinska sestra koja trenutno radi u području maternalne zdravstvene zaštite (→odjeljak AB)
- 5) Medicinska sestra koja trenutno radi u području neonatološke zdravstvene zaštite (odjel babinjača, dječja soba ili NJIN) (→odjeljak CD)
- 6) Liječnik specijalist pedijatrije - neonatolog (→odjeljak CD)
- 7) Liječnik specijalist ginekologije i porodništva (→odjeljak AB)
- 8) Specijalizant ginekologije i porodništva (→odjeljak AB)
- 9) Specijalizant neonatologije (→odjeljak CD)

**S4a. U kojem području provedete većinu svog radnog vremena?**

- 1) Trenutno uglavnom radim u području skrbi za trudnice, roditelje i/ili babinjače (npr. u rađaonici)
- 2) Trenutno uglavnom radim u području skrbi za novorođenčad (npr. na odjelu neonatologije za bolesnu djecu odnosno na odjelu babinjača gdje se nalaze zdrava novorođenčad)
- 3) Radim u oba područja (skrbi za žene i novorođenčad)

## Područje skrbi za trudnice, roditelje i babinjače (Dio A-Dio B)

- K. U ovom dijelu upitnika odgovori se odnose na skrb za **zdrave trudnice** sa spontanim početkom porođaja, na odjelu / klinici na kojoj radite:

|                                                                                                                                                                                                                   | 1)<br>Da | 2) Da, ali su<br>potrebna<br>mala<br>poboljšanja | 3) Ne,<br>potrebna su<br>značajna<br>poboljšanja |
|-------------------------------------------------------------------------------------------------------------------------------------------------------------------------------------------------------------------|----------|--------------------------------------------------|--------------------------------------------------|
| A1. Prisutna je odgovarajuća fizička infrastruktura (npr. voda, struja, sanitarni čvorovi, prostori za roditelje su dostupni i logično posloženi tako da iste primalje / liječnici mogu skrbiti za žene u porodu) |          |                                                  |                                                  |
| A2. Uvijek postoji odgovarajuća oprema i materijali za osnovnu skrb, u dovoljnim količinama.                                                                                                                      |          |                                                  |                                                  |
| A3. Za svo osoblje su dostupne sveobuhvatne, pisane smjernice ili protokoli o preporučenim kliničkim postupcima za zdrave trudnice, ažurirani na temelju najnovijih dokaza (medicina temeljena na dokazima, MTD)  |          |                                                  |                                                  |
| A4. Organizirana je učinkovita i podržavajuća supervizija na radnom mjestu za potrebe poboljšanja osobnih praktičnih vještina (npr. podučavanje / mentoriranje)                                                   |          |                                                  |                                                  |

| A5. Sudjelovali ste u učinkovitim edukacijama kako biste ojačali svoje specifične vještine u sljedećim područjima: (minimalno jedna edukacija u zadnje tri godine) | 1)<br>Da | 2) Da, ali su<br>potrebna<br>mala<br>poboljšanja | 3) Ne,<br>potrebna su<br>značajna<br>poboljšanja |
|--------------------------------------------------------------------------------------------------------------------------------------------------------------------|----------|--------------------------------------------------|--------------------------------------------------|
| A5.1 Upotreba partograma?                                                                                                                                          |          |                                                  |                                                  |
| A5.2 Nadzor otkucaja fetalnog srca (npr. povremena askultacija otkucaja fetalnog srca tijekom porođaja i/ili interpretacija CTG nalaza)?                           |          |                                                  |                                                  |
| A5.3 Smanjenje broja nepotrebnih carskih rezova (npr. edukacija o indukciji porođaja ili indikacijama za carski rez)?                                              |          |                                                  |                                                  |

- L. U ovom dijelu upitnika odgovori se odnose na pružanje skrbi tijekom za **najopasnijih porođajnih komplikacija** (npr. postpartalno krvarenje, eklampsija, distocija ramena, zatajenje srca trudnice itd.) na klinici / odjelu na kojem radite:

|                                                                                                                                                                                   | 1)<br>Da | 2) Da, ali su<br>potrebna<br>mala<br>poboljšanja | 3) Ne,<br>potrebna su<br>značajna<br>poboljšanja |
|-----------------------------------------------------------------------------------------------------------------------------------------------------------------------------------|----------|--------------------------------------------------|--------------------------------------------------|
| B1. Prisutna je odgovarajuća fizička infrastruktura (tj. voda, struja, kanalizacija, dostupni su prostori za hitne postupke koji su logično posloženi za pružanje neophodnu skrb) |          |                                                  |                                                  |
| B2. Stalno se osigurava odgovarajuća oprema i zalihe za osnovnu skrb u dovoljnim količinama                                                                                       |          |                                                  |                                                  |
| B3. Postoje pisane, sveobuhvatne smjernice ili protokoli o preporučenim kliničkim postupcima za ozbiljne opstetričke                                                              |          |                                                  |                                                  |



|                                                                                                                                                                         |          |                                         |                                         |
|-------------------------------------------------------------------------------------------------------------------------------------------------------------------------|----------|-----------------------------------------|-----------------------------------------|
| hitnoće, ažurirani na temelju najnovijih dokaza (medicina temeljena na dokazima, MTD) dostupni su za svo osoblje                                                        |          |                                         |                                         |
| B4. Organiziran je učinkovit sustav podrške i nadzora unutar službe u svrhu poboljšanja vlastitih praktičnih vještina pojedinca (mentorstvo)                            |          |                                         |                                         |
| B5. U slučaju potrebe, sustav za upućivanje i transport pacijentica je funkcionalan i pruža skrb odgovarajuće kvalitete (tj. siguran, dostupan bez odgode 24h / 7 dana) |          |                                         |                                         |
| B6. Sudjelovali ste u učinkovitim edukacijama kako biste unaprijedili svoje specifične vještine u sljedećim područjima: (minimalno jedna edukacija u zadnje tri godine) | 1)<br>Da | 2) Da, ali su potrebna mala poboljšanja | 3) Ne, potrebna su značajna poboljšanja |
| B6.1 Zbrinjavanju prekomjernog postpartalnog krvarenja?                                                                                                                 |          |                                         |                                         |
| B6.2 Zbrinjavanju eklampsije?                                                                                                                                           |          |                                         |                                         |
| B6.3 Zbrinjavanju zastoja ramena?                                                                                                                                       |          |                                         |                                         |
| B6.4 Zbrinjavanju zastoja maternalnog srca?                                                                                                                             |          |                                         |                                         |

## Skrb za novorođenčad (Dio A-Dio B)

A. Vezano za skrb **novorođenčeta bez komplikacija**, na klinici / odjelu na kojem radite:

|                                                                                                                                                                                                                  |          |                                         |                                         |
|------------------------------------------------------------------------------------------------------------------------------------------------------------------------------------------------------------------|----------|-----------------------------------------|-----------------------------------------|
|                                                                                                                                                                                                                  | 1)<br>Da | 2) Da, ali su potrebna mala poboljšanja | 3) Ne, potrebna su značajna poboljšanja |
| A1. prisutna je odgovarajuća fizička infrastruktura (tj. voda, struja, sanitarni čvorovi, prostorije za zdravu novorođenčad dostupne su i logično dizajnirane za osiguravanje kontinuiteta skrbi)                |          |                                         |                                         |
| A2. stalno je dostupna odgovarajuća oprema i zalihe potrošnog materijala za pružanje osnovne skrbi, u dovoljnim količinama                                                                                       |          |                                         |                                         |
| A3. napisane sveobuhvatne smjernice ili protokoli o preporučenim kliničkim postupcima za zdravu novorođenčad, ažurirane na temelju najnovijih dokaza (medicina temeljena na dokazima) dostupne su za svo osoblje |          |                                         |                                         |
| A4. Organiziran je učinkovit sustav podrške i nadzora unutar službe u svrhu poboljšanja osobnih praktičnih vještina (tj. podučavanje).                                                                           |          |                                         |                                         |
| A5. Sudjelovali ste u učinkovitim edukacijama kako biste ojačali svoje specifične vještine u sljedećim područjima: (minimalno jedna edukacija u zadnje tri godine)                                               | 1)<br>Da | 2) Da, ali su potrebna mala poboljšanja | 3) Ne, potrebna su značajna poboljšanja |
| A5.1 u promociji, podršci i savjetovanju o dojenju?                                                                                                                                                              |          |                                         |                                         |
| A5.2 u promociji kontakta koža na kožu i o tome kako utopli novorođenče?                                                                                                                                         |          |                                         |                                         |
| A5.3 o standardnim mjerama skrbi (npr. skrb za pupčanu vrpцу, cijepjenje, procjene znakova opasnosti)?                                                                                                           |          |                                         |                                         |

B. Kod najopasnijih neonatalnih komplikacija (npr. prisutnosti mekonijske plodove vode, nedonoščadi ili novorođenčadi niske porođajne težine, sumnje na neonatalnu sepsu itd.), na klinici / odjelu za maternalnu i/ili novorođenačku skrb na kojem radite:

|                                                                                                                                                                                                                     | 1)<br>Da | 2) Da, ali su<br>potrebna<br>mala<br>poboljšanja | 3) Ne,<br>potrebna su<br>značajna<br>poboljšanja |
|---------------------------------------------------------------------------------------------------------------------------------------------------------------------------------------------------------------------|----------|--------------------------------------------------|--------------------------------------------------|
| B1. Prisutna je odgovarajuća fizička infrastruktura (tj. voda, struja, sanitarni čvorovi, prostorije za zdravu novorođenčad dostupne su i logično dizajnirane za osiguravanje kontinuiteta skrbi)                   |          |                                                  |                                                  |
| B2. Stalno se dostupna odgovarajuća oprema i zalihe potrošnog materijala za pružanje osnovne skrbi, u dovoljnim količinama                                                                                          |          |                                                  |                                                  |
| B3. Pisane, sveobuhvatne smjernice ili protokoli o preporučenim kliničkim postupcima za neonatalne komplikacije, ažurirane na temelju najnovijih dokaza (medicina temeljena na dokazima) dostupne su za svo osoblje |          |                                                  |                                                  |
| B4. Organiziran je učinkovit sustav podrške i nadzora unutar službe u svrhu poboljšanja praktičnih vještina (tj. podučavanje).                                                                                      |          |                                                  |                                                  |
| B5. Po potrebi sustav za upućivanje i transport pacijenta je funkcionalan i pruža skrb odgovarajuće kvalitete (tj. siguran, dostupan bez odgađanja 24h / 7 dana)                                                    |          |                                                  |                                                  |
| B6. Sudjelovali ste u učinkovitim edukacijama kako biste ojačali svoje specifične vještine u sljedećim područjima: (minimalno jedna edukacija u zadnje tri godine)                                                  | 1)<br>Da | 2) Da, ali su<br>potrebna<br>mala<br>poboljšanja | 3) Ne,<br>potrebna su<br>značajna<br>poboljšanja |
| O reanimaciji novorođenčeta?                                                                                                                                                                                        |          |                                                  |                                                  |

**Važno:** postoje različita pitanja za tri moguća scenarija: za primalje koje pružaju skrb roditeljama, babinjačama i/ili novorođenčadi, za liječnike/ce koje pružaju skrb roditeljama i/ili babinjačama i liječnike/ce koje pružaju skrb novorođenčadi.

Za zdravstvene radnike koji rade u **materinskom području**:

**Q1. Ovdje možete upisati sugestije i/ili komentare vezane uz poboljšanje skrbi za zdrave trudnice, roditelje i babinjače kod najozbiljnih porodničkih hitnoća i/ili vezanih za skrb za zdravu novorođenčad.**

Za zdravstvene djelatnike koji rade u **neonatalnom području**:

**Q1. Ovdje možete upisati sugestije i/ili komentare vezane uz poboljšanja skrbi za zdravu novorođenčad i za najozbiljnija hitna stanja kod novorođenčadi.**

Za primalje koje rade u **području majki i novorođenčadi**:

**Q1. Ovdje možete upisati sugestije i/ili komentare vezane uz poboljšanja skrbi za zdrave trudnice, roditelje i babinjače te one sa najozbiljnijim porodničkim hitnoćama i/ili za zdravu novorođenčad te za najozbiljnija hitna stanja kod novorođenčadi.**

|  |
|--|
|  |
|--|

## C. Organizacija rada, upravljanje podacima i komunikacija

Glede **organizacije rada**, na klinici / odjelu za maternalnu i/ili neonatološku skrb na kojem radite:

|                                                                                                                             | 1)<br>Da | 2) Da, ali su<br>potrebna<br>mala<br>poboljšanja | 3) Ne,<br>potrebna su<br>značajna<br>poboljšanja |
|-----------------------------------------------------------------------------------------------------------------------------|----------|--------------------------------------------------|--------------------------------------------------|
| C1. Postoji dovoljan broj zdravstvenih djelatnika kako bi se osigurala odgovarajuća skrb                                    |          |                                                  |                                                  |
| C2. Uloge i odgovornosti svakog zdravstvenog djelatnika jasno su napisane i razumljivo / opsežno definirane                 |          |                                                  |                                                  |
| C3. Predaja smjene učinkovita je i cjelovita u svim relevantnim aspektima skrbi, poštujući i štiteći povjerljivost podataka |          |                                                  |                                                  |

Vezano za **prikupljanje i upotrebe podataka**, na klinici / odjelu za maternalnu i/ili neonatološku skrb na kojem radite:

|                                                                                                                                                                                                                                                                                                                                                                                 | 1)<br>Da | 2) Da, ali su<br>potrebna<br>mala<br>poboljšanja | 3) Ne,<br>potrebna su<br>značajna<br>poboljšanja |
|---------------------------------------------------------------------------------------------------------------------------------------------------------------------------------------------------------------------------------------------------------------------------------------------------------------------------------------------------------------------------------|----------|--------------------------------------------------|--------------------------------------------------|
| C4. Postoji sustav prikupljanja kliničkih podataka (npr. pisani ili računalni registar) koji je cjelovit, točan, pouzdan i jednostavan za korištenje                                                                                                                                                                                                                            |          |                                                  |                                                  |
| C5. Postoji popis unaprijed postavljenih pokazatelja kvalitete skrbi (npr. stopa sljedećih postupaka: carski rez prema Robsonovoj klasifikaciji, epiziotomije, Kristellerov hvat, indukcije, dojenje, kontakt koža na kožu, klokan njega itd.), koji se koriste za sastavljanje statističkih izvješća koja se redovito dijele s osobljem i o kojima se raspravlja na sastancima |          |                                                  |                                                  |

Vezano za **komunikaciju i upotrebu podataka**, na klinici / odjelu za maternalnu i/ili neonatološku skrb na kojem radite:

|                                                                                                                                                                                                                                                                                    | 1) Da | 2) Da, ali su<br>potrebna<br>mala<br>poboljšanja | 3) Ne,<br>potrebna su<br>značajna<br>poboljšanja |
|------------------------------------------------------------------------------------------------------------------------------------------------------------------------------------------------------------------------------------------------------------------------------------|-------|--------------------------------------------------|--------------------------------------------------|
| C6. Općenito, zdravstveni djelatnici učinkovito komuniciraju sa ženama i obiteljima (npr. osiguraju da pacijentice i njihove obitelji razumiju i/ili imaju priliku postaviti pitanja i slobodno izražavati svoja mišljenja) koristeći jednostavan i kulturološki prihvatljiv jezik |       |                                                  |                                                  |
| C7. Žene i njihove obitelji dobivaju jasne edukativne materijale koji se odnose na zdravlje trudnica, roditelja, babinjača i/ili novorođenčadi, u pristupačnom obliku (pismeno, digitalno ili slikovno), dostupno na svim jezicima zajednica kojima se pruža skrb u toj ustanovi   |       |                                                  |                                                  |

|                                                                                                                                                                                                                                       |  |  |  |
|---------------------------------------------------------------------------------------------------------------------------------------------------------------------------------------------------------------------------------------|--|--|--|
| C8. Sudjelovali ste u učinkovitim edukacijama kako biste ojačali svoje specifične vještine u međuljudskoj komunikaciji i savjetovanju (npr. o osiguravanju informiranog pristanka) (najmanje jedna edukacija u posljednje tri godine) |  |  |  |
|---------------------------------------------------------------------------------------------------------------------------------------------------------------------------------------------------------------------------------------|--|--|--|

Q2. Predložite ili opišite što smatrate da bi poboljšalo organizaciju rada, prikupljanje i korištenje podataka kao i komunikaciju.

|  |
|--|
|  |
|--|

## D. Kvaliteta skrbi i provođenja postupaka

Vežano za **emocionalnu, psihološku i podršku za donošenje odluka**, na klinici / odjelu za maternalnu i/ili neonatološku skrb na kojoj radite:

|                                                                                                                                                                                                                                                                                                                                                                             | 1)<br>Da | 2) Da, ali su<br>potrebna<br>mala<br>poboljšanja | 3) Ne,<br>potrebna su<br>značajna<br>poboljšanja |
|-----------------------------------------------------------------------------------------------------------------------------------------------------------------------------------------------------------------------------------------------------------------------------------------------------------------------------------------------------------------------------|----------|--------------------------------------------------|--------------------------------------------------|
| D1. Zajamčena je mogućnost da sve žene imaju odabranu pratnju na porodu onoliko dugo koliko smatraju potrebnim (tj. u svim fazama poroda i poslijeporođajnog razdoblja)                                                                                                                                                                                                     |          |                                                  |                                                  |
| D2. Sudjelovali ste u učinkovitim edukacijama/ radionicama za poboljšavanje specifičnih vještina pružanja emocionalne podrške ženama i osnaživanja žena tijekom i/ili nakon poroda (npr. razumijevanje utjecaja emocionalnog stanja na oslobađanje oksitocina i podučavanje praktičnih metoda za upravljanje osjećajima) (najmanje jedna edukacija u posljednje tri godine) |          |                                                  |                                                  |

Vežano za **zaštitu privatnosti žena**, na klinici / odjelu za maternalnu i/ili neonatološku skrb na kojoj radite:

|                                                                                                                                                                                                                                | 1)<br>Da | 2) Da, ali su<br>potrebna<br>mala<br>poboljšanja | 3) Ne,<br>potrebna su<br>značajna<br>poboljšanja |
|--------------------------------------------------------------------------------------------------------------------------------------------------------------------------------------------------------------------------------|----------|--------------------------------------------------|--------------------------------------------------|
| D3. Dostupna je odgovarajuća infrastruktura koja osigurava privatnost žena i njihovih obitelji (npr. privatne sobe za posjete, dostupnost zavjesa ili pregrada između kreveta u sobi, odgovarajući broj kreveta po sobi, itd.) |          |                                                  |                                                  |
| D4. Provode se sve potrebne mjere koje jamče privatnost i povjerljivost žena i njihovih obitelji (npr. o privatnim se informacijama raspravlja na način da drugi ne mogu čuti itd.)                                            |          |                                                  |                                                  |

Q3. Predložite ili opišite što smatrate da bi poboljšalo i/ili emocionalnu, psihološku i podršku odlučivanju u zaštiti privatnosti žena.

|  |
|--|
|  |
|--|

**Imajte na umu:** postoje dvije različite verzije pitanja D5.1 za tri moguća putanja upitnika; primalje koje rade i na području majki i novorođenčadi trebale bi odgovoriti na obje verzije.

Vezano **prava žena na informirani izbor** na klinici / odjelu maternalne i/ili neonatološke skrbi na kojem radite:

Za **maternalnu skrb** (odjeli za trudnice/ roditelje):

| D5.1. Postoje li pisani/ digitalni materijali koji usmjeravaju zdravstvene djelatnike i opsežno opisuju rizike i dobiti slijedećih intervencija, s ciljem boljeg informiranja žena: | 1) Da | 2) Da, ali su potrebna mala poboljšanja | 3) Ne, potrebna su značajna poboljšanja |
|-------------------------------------------------------------------------------------------------------------------------------------------------------------------------------------|-------|-----------------------------------------|-----------------------------------------|
| a) Carski rez                                                                                                                                                                       |       |                                         |                                         |
| b) Indukcija porođaja                                                                                                                                                               |       |                                         |                                         |

Za **skrb o novorođenčadi** (odjeli neonatologije/ babinjača):

| D5.1. Postoje li pisani/ digitalni materijali koji usmjeravaju zdravstvene djelatnike i opsežno opisuju rizike i dobiti slijedećih intervencija, s ciljem boljeg informiranja žena: | 1) Da | 2) Da, ali su potrebna mala poboljšanja | 3) Ne, potrebna su značajna poboljšanja |
|-------------------------------------------------------------------------------------------------------------------------------------------------------------------------------------|-------|-----------------------------------------|-----------------------------------------|
| a) Profilaktička primjena vitamina K kod novorođenčadi                                                                                                                              |       |                                         |                                         |
| b) Profilaktička primjena kapi za oči/ masti za oči kod novorođenčadi                                                                                                               |       |                                         |                                         |

Vezano **prava žena na informirani izbor** na klinici / odjelu maternalne i/ili neonatološke skrbi na kojem radite:

|                                                                                                                                                                                                                                          | 1) Da | 2) Da, ali su potrebna mala poboljšanja | 3) Ne, potrebna su značajna poboljšanja |
|------------------------------------------------------------------------------------------------------------------------------------------------------------------------------------------------------------------------------------------|-------|-----------------------------------------|-----------------------------------------|
| D5.2. Trudnice imaju na raspolaganju redovite edukacije čiji je cilj upoznati ih sa postupcima koji zahtijevaju pristanak                                                                                                                |       |                                         |                                         |
| D6. Sudjelovali ste u učinkovitim edukacijama o tome kako na odgovarajući način informirati žene i davati prednosti informiranom izboru o ključnim postupcima koji se odnose na porod (najmanje jedna edukacija u posljednje tri godine) |       |                                         |                                         |

Uzimajući u obzir ostale **aspekte kvalitete skrbi**, na klinici / odjelu maternalne i/ili neonatološke skrbi na kojem radite:

|                                                                                                                                                                      | 1) Da | 2) Da, ali su potrebna mala poboljšanja | 3) Ne, potrebna su značajna poboljšanja |
|----------------------------------------------------------------------------------------------------------------------------------------------------------------------|-------|-----------------------------------------|-----------------------------------------|
| D7. Postoji tim posvećen poboljšanju kvalitete skrbi na vašem odjelu / jedinici i taj tim je učinkovit u svom djelovanju                                             |       |                                         |                                         |
| D8. Organiziraju se sastanci najmanje jednom tjedno, na kojima se raspravlja o najvažnijim kliničkim slučajevima sa svim zdravstvenim djelatnicima uključeni u skrbi |       |                                         |                                         |

|                                                                                                                                                                                                                                                            |  |  |  |
|------------------------------------------------------------------------------------------------------------------------------------------------------------------------------------------------------------------------------------------------------------|--|--|--|
| D9. U slučaju maternalne i/ili neonatalne smrti, organiziraju se otvoreni i konstruktivni sastanci / revizije, sa svim zdravstvenim djelatnicima koji su uključeni u skrb, kako bi se analizirao slučaj i dogovorili koraci za poboljšanje kvalitete skrbi |  |  |  |
| D10. Sudjelovali ste u učinkovitim i specifičnim edukacijama o pravima žena i novorođenčadi tijekom poroda i poslijeporođajnog razdoblja u svojoj ustanovi (barem jedna edukacija u posljednje tri godine)                                                 |  |  |  |
| D11. Sudjelovali ste u učinkovitim i specifičnim edukacijama o metodama ublažavanja boli kod žena (farmakološkim i nefarmakološkim) i/ili prevenciji odnosno ublažavanju bolova kod novorođenčadi (najmanje jedna edukacija u posljednje tri godine)       |  |  |  |

Q4. Predložite ili opišite što smatrate da bi poboljšalo i/ili pravo žena na informirani izbor i druge aspekte kvalitete skrbi.

|  |
|--|
|  |
|--|

## E. Pripremljenost i odgovor na pandemiju COVID-19

Od početka pandemije COVID-19, kolika je bila razina pripremljenosti i odaziva na klinici / odjelu za maternalnu i/ili neonatološku skrb na kojem radite za sljedeće:

|                                                                                                                                                                                                                          | 1) Postoje i/ili odgovarajuće su od početka pandemije | 2) Ne postoje uvijek i/ili nisu u potpunosti adekvatni (npr. nedostajalo je u prvim fazama pandemije) | 3) Nikada nije postojalo i/ili nikad nije bilo adekvatno od početka pandemije do danas |
|--------------------------------------------------------------------------------------------------------------------------------------------------------------------------------------------------------------------------|-------------------------------------------------------|-------------------------------------------------------------------------------------------------------|----------------------------------------------------------------------------------------|
| E1. Uspostavljen je poseban put kretanja za pacijente za koje se sumnja / potvrđena je zaraza COVID-19 od trenutka ulaska na odjel / kliniku za maternalnu i/ili neonatološku skrb, kako bi se smanjio rizik od zaraze   |                                                       |                                                                                                       |                                                                                        |
| E2. Osobna zaštitna oprema (npr. maske, rukavice, mantili) za zdravstvene djelatnike redovito je dostupna u dovoljnom broju                                                                                              |                                                       |                                                                                                       |                                                                                        |
| E3. Na raspolaganju je odgovarajući broj stanica za higijenu ruku (opremljenih vodom, sapunom, papirnatim ručnicima ili alkoholnom otopinom) koje su dostupne svim zdravstvenim radnicima, ženama i njihovim obiteljima. |                                                       |                                                                                                       |                                                                                        |
| E4. Smjernice, jasne i ažurirane na temelju međunarodnih preporuka (npr. WHO, FIGO, NICE, RCOG itd.) specifične za skrb trudnica, roditelja, babinjača i/ili novorođenčadi, dostupne su svim zdravstvenim djelatnicima.  |                                                       |                                                                                                       |                                                                                        |
| E5. Oprema i pribor za dijagnostičko testiranje za COVID-19 (tj. nazofaringealni brisevi i reagensi) dostupni su u dovoljnim količinama za sve                                                                           |                                                       |                                                                                                       |                                                                                        |

|                                                                                                                                                                                                                                   |  |  |  |
|-----------------------------------------------------------------------------------------------------------------------------------------------------------------------------------------------------------------------------------|--|--|--|
| sumnjive slučajeve među trudnicama, roditeljama, babinjačama, novorođenčadi i/ili kod zdravstvenih djelatnika                                                                                                                     |  |  |  |
| E6. Odgovarajuća edukacija zdravstvenih radnika koja pokriva ključne postupke nametnute pandemijom COVID-19 (npr. prevencija prijenosa, odgovarajuća uporaba osobne zaštitne opreme itd.) dostupna je svim zdravstvenim radnicima |  |  |  |

Jesu li se od početka pandemije COVID-19 ikad dogodile sljedeće situacije na klinici / odjelu za maternalnu i/ili neonatološku skrb na kojem radite:

|                                                                                                                                                                                                             | 1) Nikad se nije dogodilo | 2) Dogodilo se tijekom pandemije COVID-19 (bilo samo u određenim fazama ili cijelo vrijeme) | 3) Događalo se neovisno od pandemije COVID-19 |
|-------------------------------------------------------------------------------------------------------------------------------------------------------------------------------------------------------------|---------------------------|---------------------------------------------------------------------------------------------|-----------------------------------------------|
| E7. Zatvaranje rodilišta i/ili smanjenje broja rutinskih usluga (npr. ambulantne posjete, ultrazvučni pregledi, dnevna skrb) i/ili smanjenje broja kreveta za trudnice, roditelje, babinjače i novorođenčad |                           |                                                                                             |                                               |
| E8. Nedovoljan broj zdravstvenih djelatnika za pružanje osnovne skrbi za trudnice, roditelje, babinjače i novorođenčad                                                                                      |                           |                                                                                             |                                               |
| E9. Ušutkavanje (cenzura) osoblja kako bi se izbjeglo prijavljivanje neadekvatnih kliničkih i/ili administrativnih postupaka                                                                                |                           |                                                                                             |                                               |

E10. Je li se od početka pandemije COVID-19 ikad dogodila neka od sljedećih situacija na klinici / odjelu za skrb trudnica, roditelja babinjača i/ili novorođenčeta na kojem radite:

|                                                                                                                                                 | 1) Nikad se nije dogodilo | 2) Dogodilo se tijekom pandemije COVID-19 (bilo samo u određenim fazama ili cijelo vrijeme) | 3) Događalo se neovisno od pandemije COVID-19 |
|-------------------------------------------------------------------------------------------------------------------------------------------------|---------------------------|---------------------------------------------------------------------------------------------|-----------------------------------------------|
| E10a. Povećavanje medikalizacije porođaja (tj. neprimjerena uporaba oksitocina, povećana stopa epiziotomija, vakuuma i/ili carskih rezova itd.) |                           |                                                                                             |                                               |
| E10b. Ograničenja pratnje na porodu, bez jasne kliničke indikacije                                                                              |                           |                                                                                             |                                               |
| E10c. Ograničenja slobode kretanja tijekom poroda, bez jasne kliničke indikacije                                                                |                           |                                                                                             |                                               |
| E10d. Ograničenja mogućnosti ublažavanja boli (farmakološke i nefarmakološke) za sve žene koje to zahtijevaju, u svim fazama poroda             |                           |                                                                                             |                                               |

|                                                                                                                                                                                                                                                                                                                                                |  |  |  |
|------------------------------------------------------------------------------------------------------------------------------------------------------------------------------------------------------------------------------------------------------------------------------------------------------------------------------------------------|--|--|--|
| E10e. Ograničenja <i>rooming-in</i> smještaja, bez jasne kliničke indikacije                                                                                                                                                                                                                                                                   |  |  |  |
| E10f. Ograničenja dojenja, bez jasne kliničke indikacije (imajte na umu da međunarodne smjernice trenutno <b>ne</b> ukazuju na to da žene s potvrđenim COVID-19 trebaju ograničiti dojenje, osim ako su ozbiljno bolesne i ne mogu fizički dojiti zbog toga)                                                                                   |  |  |  |
| E10g. Ograničenja kontakta koža na kožu u prvom satu nakon poroda, u nedostatku jasnih kliničkih indikacija (imajte na umu da međunarodne smjernice trenutno <b>ne</b> ukazuju na to da žene s potvrđenim COVID-19 trebaju ograničiti kontakt koža na kožu s djetetom, osim ako je majka bolesna do te mjere da ne može dijete fizički dojiti) |  |  |  |

Q5. Predložite ili opišite što smatrate da bi poboljšalo razinu pripremljenost i odziv na klinici / odjelu za trudnice, roditelje, babinjače i/ili novorođenčad na kojem radite za vrijeme pandemije COVID-19.

## F. Zaključna pitanja

F1. Općenito, mislite li da je klinika / odjel na kojem radite odgovarajuće reagirala na pandemiju COVID-19?

- 1) Da, klinika / odjel za skrb trudnica, roditelja, babinjača i/ili novorođenčadi reagirala je odgovarajuće
- 2) Da, ali odgovor treba poboljšati
- 3) Ne, odgovor treba značajno poboljšati

F2. Jesu li se razine stresa povezane s vašim poslom promijenile tijekom pandemije COVID-19?

- 1) Znatno su se povećale
- 2) Blago su se povećale
- 3) Nisu se promijenile
- 4) Blago su se smanjile
- 5) Znatno su se smanjile

F3. Overall, since the beginning of the pandemic and up till now, how satisfied are you with your job?

|                         |                    |                 |                  |                       |
|-------------------------|--------------------|-----------------|------------------|-----------------------|
| 1- vrlo nezadovoljan/na | 2- nezadovoljan/na | 3- neutralan/na | 4- zadovoljan/na | 5- vrlo zadovoljan/na |
|-------------------------|--------------------|-----------------|------------------|-----------------------|

## G. Socio-demografska pitanja

G1. Koliko godina radite na području zdravstvene skrbi za majke ili novorođenčadi?

- 1) Manje od 5
- 2) Između 5 i 10
- 3) Više od 10

G2 U kojoj zemlji radite? (Molimo odaberite državu)



Popis 53 europske regije SZO. Ako je HW odgovorio iz sljedećih zemalja, bit će dostupno dodatno pitanje s naznakom regije: Bosna, Hrvatska, Francuska, Njemačka, Italija, Norveška, Portugal, Rumunjska, Srbija, Španjolska, Švedska, UK.

G2a. Ovo istraživanje odnosi se isključivo na Europsku regiju Svjetske zdravstvene organizacije, koje uključuje 53 zemalja i pokriva ogromnu površinu od Atlantskog do Tihog oceana.

Ako vaša zemlja nije na popisu, odakle ste? Molimo, upišite. Navedite županiju u kojoj radite.

G3. Koliko imate godina?

- 1) 20-29
- 2) 30-39
- 3) 40-49
- 4) 50-59
- 5) 60-69
- 6) >=70

G4. Kojeg ste spola?

- 1) Muško
- 2) Žensko
- 3) Ostalo
- 4) Radije se opisujem kao nebinarni / rodno fluidni
- 5) Ne želim odgovoriti

G5. Datum sudjelovanja u istraživanju (datum-mjesec-godina): \_\_\_\_\_

Ovo će nam pomoći da interpretiramo rezultate obzirom različite faza pandemije COVID-19 u svakoj zemlji.

G6. Želite li e-poštom dobiti rezultate ove studije nakon što je završena?

Podaci će se tretirati u skladu sa smjernicama za obradu osobnih podataka i vaša adresa e-pošte neće biti otkrivena ni u jednoj fazi niti će se dijeliti trećim osobama.

- 1) Da (→ G6a)
- 2) Ne

G6a. Vaša adresa e-pošte neće na bilo koji način biti povezana s odgovorima koje ste dali u ovom istraživanju.

U skladu sa člancima 13. i 23. Zakona 196/2003 Republike Italije, davanje svoje adrese e-pošte u ovom obrascu, vezano za obradu osobnih podataka prema metodama i unutar ograničenja koje su opisane u gore-navedenoj politici:

*“Dobrovoljno dajem kontakt e-pošte da bih primio/la rezultate ovog upitnika nakon što oni budu objavljeni.”*

G7. Kako ste čuli za ovu studiju? (odaberite sve primjenjive odgovore)

- 1) Na društvenim mrežama (Facebook / Instagram)
- 2) Internetska pretraga (npr. Google)
- 3) Primljen e-mail od prijatelja / obitelji / posla / kolege
- 4) Usmena predaja
- 5) Iz medija (npr. radio, tiskani mediji, TV)
- 6) Ostalo (molimo navedite)

Q6. Predložite ili opišite što smatrate da bi poboljšalo kvalitetu skrbi za trudnice, roditelje, babinjače i/ili novorođenčad na klinici / odjelu za maternalnu i neonatološku skrb na kojem radite, odnosno prijedloge i komentare za poboljšanje ovog istraživanja

**Pritiskom na gumb "Submit" predati ćete svoje odgovore.**

**Ako želite kontaktirati istraživački tim u svojoj zemlji, preuzmite datoteku na kraju ovog obrasca.**

**Završili ste! Hvala vam što ste izdvojili vrijeme i sudjelovali u istraživanju.  
Želimo vam ugodan dan!**

## Supplementary Table 13. Final health workers' IMAGINE questionnaire in Romanian

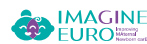

Proiect internațional

# IMAGINE EURO

(Îmbunătățirea îngrijirii pentru mame și nou-născuți în regiunea EUROPEANĂ)

*Chestionar online despre gradul de pregătire, calitatea și stabilitatea serviciilor de sănătate maternă și a nou-născuților în țările din Regiunii Europene OMS pe durata pandemiei COVID-19*

*Chestionarul se bazează pe standardele de îmbunătățire a calității îngrijirii materne și a nou-născuților în unitățile sanitare elaborate de OMS.*

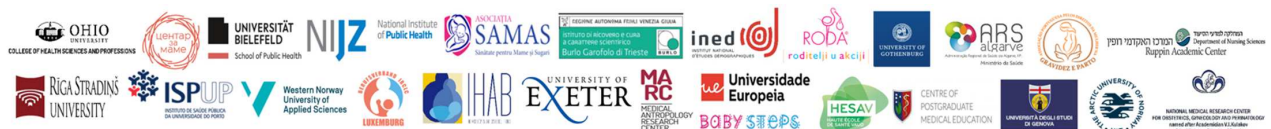

## Sunteți un cadru medical care a fost implicat direct în îngrijirea maternă / neonatală dintr-o unitate medicală în timpul pandemiei COVID-19?

### Participă la sondaj: opinia ta contează

Participarea dvs. este voluntară: timpul necesar este de aproximativ 15 minute.

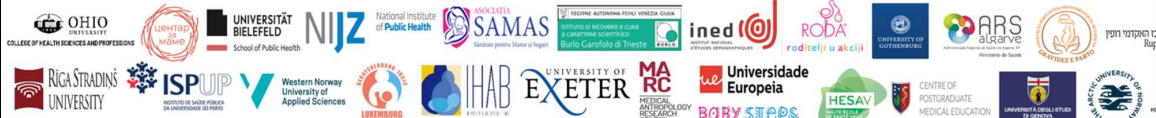

Chestionarul are la bază Standardele elaborate de OMS pentru îmbunătățirea îngrijirii materne și a nou-născuților în unitățile medicale.

**Vă rugăm să rețineți:** sondajul este dedicat tuturor medicilor care lucrează în prezent în îngrijirea perinatală (a mamei și a nou născutului), moașelor, asistentelor medicale, neonatologilor, obstetricienilor și ginecologilor, precum și rezidenților de obstetrică și ginecologie sau de neonatologie.

**Vă garantăm confidențialitatea. Pentru a înțelege mai bine studiul, prelucrarea datelor colectate și ce facem cu datele, vă rugăm să citiți Consimțământul informat și politica de confidențialitate disponibile în documentul descărcabil la linkul de mai jos.**

Vă rugăm să rețineți: sondajul este dedicat tuturor medicilor care lucrează în prezent în îngrijirea perinatală (a mamei și a nou născutului), moașelor, asistentelor medicale, neonatologilor, obstetricienilor și ginecologilor, precum și rezidenților de obstetrică și ginecologie sau de neonatologie.

Dacă nu vă recunoașteți în profesioniștii din domeniul sănătății enumerați mai sus, vă rugăm să economisiți timpul și să închideți linkul.

Oricum, vă mulțumim foarte mult pentru interesul dvs. pentru cercetarea noastră.

Dacă cunoașteți pe cineva care poate participa, vă rugăm să îi trimiteți linkul chestionarului.

Încă o dată, vă mulțumim pentru timpul acordat.

**Dacă răspundeți afirmativ la următoarea întrebare, înseamnă că decideți în mod voluntar să participați la sondaj.**

#### CONSIMȚĂMÂNT DE PARTICIPARE:

Am citit și am înțeles formularul de consimțământ în pagina anterioară și, selectând „Da” de mai jos, îmi indic disponibilitatea de a participa voluntar la studiu.

- 1) Da (→S1)
- 2) Nu (chestionarul nu poate fi completat → un mesaj va fi disponibil pentru a mulțumi pentru interesul acordat)

**Daca nu:** Completarea chestionarului va dura aproximativ 15 minute. Dacă cunoașteți pe cineva care ar dori să participe, vă rugăm să le distribuiți linkul. Vă mulțumim pentru timpul acordat! Vă dorim o zi bună!

**ÎNTREBARE DE DEPARTAJARE:****S1. Sunteți un cadru medical ce a fost direct implicat în îngrijirea maternă / neonatală într-o unitate medicală pe o perioadă mai lungă de 1 an?**

- 1) Da (→S2)
- 2) Nu (chestionarul nu poate fi completat→un mesaj va fi disponibil pentru a mulțumi pentru interesul acordat)

**If NO:** Vă mulțumim pentru interesul acordat studiului nostru.

Pentru a participa este necesar să fi fost direct implicat în îngrijirea maternă / neonatală într-o unitate medicală spitalicească, pe o perioadă mai lungă de 1 an.

Dacă cunoașteți pe cineva care corespunde acestor criterii vă rugăm să îi distribuiți linkul.

Vă mulțumim pentru timpul acordat!

Vă dorim o zi bună!

**S2. Ați fost direct implicat în îngrijirea maternă sau neonatală într-o unitate medicală de la 1 martie 2020?**

- 1) Da (→ S3)
- 2) Nu (chestionarul nu poate fi completat → un mesaj va fi disponibil pentru a mulțumi interesului)

**If NO:** Vă mulțumim pentru interesul acordat studiului nostru.

Pentru a participa, este necesar să fi fost direct implicat în îngrijirea maternă / neonatală la nivelul unei unități medicale spitalicești cel puțin începând cu 1 martie 2020.

Dacă cunoașteți pe cineva care corespunde acestor criterii vă rugăm să îi distribuiți link-ul.

Vă mulțumim pentru timpul acordat!

Vă dorim o zi bună!

**S3. Tipul de unitate de îngrijire maternă / neonatală pe care o furnizați:**

**Notă:** Dacă lucrați în mai multe maternități, vă rugăm să selectați cel la care vă veți gândi atunci când răspundeți la sondajul de întrebări

- 1) Maternitate /unitate sanitară publică
- 2) Maternitate /unitate sanitară private

**S4. Care este calificarea ta profesională?**

- 1) Medic generalist care lucrează în prezent în servicii de îngrijire maternă (→secțiunea A-B)
- 2) Medic care lucrează în prezent în îngrijirea neonatală (→secțiunea C-D)
- 3) Moasa (→secțiunea AB)
- 4) Asistent medical în servicii de îngrijire maternă (→secțiunea A-B)
- 5) Asistent medical în servicii de îngrijire neonatală (secția de lăuzie, neonatologie, sau ATI neonatologie) (→secțiunea C-D)
- 6) Medic specialist/primar neonatologie (→secțiunea C-D)
- 7) Medic specialist/primar obstetrică și ginecologie (→secțiunea A-B)
- 8) Rezident obstetrică și ginecologie (→secțiunea AB)
- 9) Rezident în neonatologie (→secțiunea C-D)

**S4a. În ce domeniu perinatal vă desfășurați în principal activitatea?**

- 1) În prezent lucrez în principal în domeniul îngrijirilor acordate mamei (de exemplu, sala de travaliu, sala de naștere)
- 2) În prezent lucrez în principal în domeniul îngrijirilor neonatale (de exemplu, secția de neonatologie pentru sugarii bolnavi sau secția de nou născuți sănătoși)
- 3) Lucrez în ambele domenii de îngrijire (maternă și neonatală)

## Domeniul îngrijirii materne: (Secțiunea A- Secțiunea B)

M. În legătură cu îngrijirea **gravidelor sănătoase care intră spontan în travaliu**, în zona / departamentul în care lucrați considerați că:

|                                                                                                                                                                                                                                                  | 1) Este adecvată | 2) Este adecvată, dar are nevoie de unele îmbunătățiri | 3) Nu este adecvată, are nevoie de îmbunătățiri semnificative |
|--------------------------------------------------------------------------------------------------------------------------------------------------------------------------------------------------------------------------------------------------|------------------|--------------------------------------------------------|---------------------------------------------------------------|
| A1. Infrastructura fizică este adecvată (de exemplu, apa curentă, electricitatea, salubritatea, zonele destinate travaliului sunt disponibile și proiectate funcțional pentru a menține continuitatea îngrijirii)                                |                  |                                                        |                                                               |
| A2. Echipamentele și consumabilele adecvate pentru îngrijirea esențială sunt furnizate în cantități suficiente în orice moment                                                                                                                   |                  |                                                        |                                                               |
| A3. Ghidurile sau protocoalele scrise, comprehensive, privind procedurile clinice recomandate pentru gravidele sănătoase sunt actualizate pe baza celor mai recente dovezi (Medicină bazată pe dovezi) și sunt disponibile pentru tot personalul |                  |                                                        |                                                               |
| A4. Supervizarea suportivă în cadrul serviciului este eficient organizată pentru a îmbunătăți abilitățile practice personale (de exemplu, îndrumarea)                                                                                            |                  |                                                        |                                                               |

| A5. Ați participat la evenimente de formare eficiente și specifice pentru a vă consolida abilitățile (răspundeți da, dacă ați participat cel puțin un eveniment în ultimii trei ani)... | 1) Este adecvată | 2) Este adecvată, dar are nevoie de unele îmbunătățiri | 3) Nu este adecvată, are nevoie de îmbunătățiri semnificative |
|-----------------------------------------------------------------------------------------------------------------------------------------------------------------------------------------|------------------|--------------------------------------------------------|---------------------------------------------------------------|
| A5.1 în utilizarea partografului?                                                                                                                                                       |                  |                                                        |                                                               |
| A5.2 în monitorizarea ritmului cardiac fetal (de exemplu, auscultarea intermitentă a ritmului cardiac fetal în timpul travaliului și / sau interpretarea CTG)?                          |                  |                                                        |                                                               |
| A5.3 în modul de reducere a secțiunilor cezariene inutile (de exemplu, training de inducere a travaliului, de indicații pentru operația cezariană)?                                     |                  |                                                        |                                                               |

N. În legătură cu cele mai **grave urgențe obstetricale** (de exemplu, hemoragie postpartum, eclampsie, distocie a umărului, stop cardiac la o gravidă etc.) în zona / secția maternă și neonatală unde lucrați:

|  | 1) Este adecvată | 2) Este adecvată, dar are nevoie de | 3) Nu este adecvată, are nevoie de |
|--|------------------|-------------------------------------|------------------------------------|
|  |                  |                                     |                                    |

|                                                                                                                                                                                                                                                               |  | unele<br>îmbunătățiri | îmbunătățiri<br>semnificative |
|---------------------------------------------------------------------------------------------------------------------------------------------------------------------------------------------------------------------------------------------------------------|--|-----------------------|-------------------------------|
| B1. Infrastructura fizică este adecvată (de exemplu, apă curentă, electricitate, canalizare, zone pentru proceduri urgente sunt disponibile și proiectate funcțional pentru a oferi îngrijire esențială)                                                      |  |                       |                               |
| B2. Echipamentele și consumabilele adecvate pentru îngrijirile esențiale sunt furnizate în cantități suficiente în orice moment                                                                                                                               |  |                       |                               |
| B3. Ghidurile sau protocoalele scrise, comprehensive privind procedurile clinice recomandate pentru <b>urgente obstetricale grave</b> sunt actualizate pe baza celor mai recente dovezi (Medicină bazată pe dovezi) și sunt disponibile pentru tot personalul |  |                       |                               |
| B4. <b>Supervizarea suportivă</b> eficientă în cadrul serviciului este organizată pentru a îmbunătăți abilitățile practice personale (de exemplu, prezența unor îndrumători)                                                                                  |  |                       |                               |
| B5. La nevoie, <b>sistemul de transfer și transport</b> către o altă unitate medicală este funcțional și oferă îngrijire la un nivel de calitate adecvat (de exemplu, este sigură, disponibilă fără întârzieri 24 ore /7 zile)                                |  |                       |                               |

|                                                                                                                                                                                         |                  |                                                        |                                                               |
|-----------------------------------------------------------------------------------------------------------------------------------------------------------------------------------------|------------------|--------------------------------------------------------|---------------------------------------------------------------|
| B6. Ați participat la evenimente de formare eficiente și specifice pentru a vă consolida abilitățile (răspundeți da, dacă ați participat cel puțin un eveniment în ultimii trei ani)... | 1) Este adecvată | 2) Este adecvată, dar are nevoie de unele îmbunătățiri | 3) Nu este adecvată, are nevoie de îmbunătățiri semnificative |
| B6.1 în modul de gestionare a hemoragiei postpartum?                                                                                                                                    |                  |                                                        |                                                               |
| B6.2 în modul de gestionare a eclampsiei?                                                                                                                                               |                  |                                                        |                                                               |
| B6.3 în modul de tratare a distociei de umăr?                                                                                                                                           |                  |                                                        |                                                               |
| B6.4 în modul de gestionare a stopului cardiovascular la o femeie însărcinată?                                                                                                          |                  |                                                        |                                                               |

## Domeniul îngrijirii neonatale (Secțiunea A- Secțiunea B)

A. În legătură cu îngrijirea unui nou-născut **fără complicații**, în zona / departamentul în care lucrați:

|                                                                                                                                                                                                                            | 1) Este adecvată | 2) Este adecvată, dar are nevoie de unele îmbunătățiri | 3) Nu este adecvată, are nevoie de îmbunătățiri semnificative |
|----------------------------------------------------------------------------------------------------------------------------------------------------------------------------------------------------------------------------|------------------|--------------------------------------------------------|---------------------------------------------------------------|
| A1. Infrastructura fizică este adecvată (de exemplu, apa curentă, electricitatea, canalizarea, zonele pentru nou-născuți sănătoși sunt disponibile și sunt concepute funcțional pentru a menține continuitatea îngrijirii) |                  |                                                        |                                                               |
| A2. Echipamentele și consumabilele adecvate sunt furnizate pentru îngrijirile esențiale în cantități suficiente, în orice moment                                                                                           |                  |                                                        |                                                               |

|                                                                                                                                                                                                                                                  |  |  |  |
|--------------------------------------------------------------------------------------------------------------------------------------------------------------------------------------------------------------------------------------------------|--|--|--|
| A3. Ghidurile sau protocoalele scrise, comprehensive, privind procedurile clinice recomandate pentru nou-născutul sănătos sunt actualizate pe baza celor mai recente dovezi (Medicină bazată pe dovezi) și sunt disponibile întregului personal. |  |  |  |
| A4. Supravegherea eficientă în cadrul serviciului este organizată pentru a îmbunătăți abilitățile practice personale (de exemplu, existența îndrumătorilor).                                                                                     |  |  |  |

|                                                                                                                                                                                         |                  |                                                        |                                                               |
|-----------------------------------------------------------------------------------------------------------------------------------------------------------------------------------------|------------------|--------------------------------------------------------|---------------------------------------------------------------|
| A5. Ați participat la evenimente de formare eficiente și specifice pentru a vă consolida abilitățile (răspundeți da, dacă ați participat cel puțin un eveniment în ultimii trei ani)... | 1) Este adecvată | 2) Este adecvată, dar are nevoie de unele îmbunătățiri | 3) Nu este adecvată, are nevoie de îmbunătățiri semnificative |
| A5.1 în promovarea alăptării, sprijin și consiliere?                                                                                                                                    |                  |                                                        |                                                               |
| A5.2 în promovarea pielii pe piele și despre cum să mențineți nou-născutul cald?                                                                                                        |                  |                                                        |                                                               |
| A5.3 în implementarea procedurilor standard (de exemplu, îngrijirea cordonului, imunizări, evaluarea semnelor de pericol)?                                                              |                  |                                                        |                                                               |

B. În ceea ce privește cele mai **grave urgențe neonatale** (de exemplu, prezența meconiului în lichidului amniotic, nou-născutul prematur sau cu greutate mică la naștere, suspiciunea de sepsis neonatal etc.), în zona / departamentul obstetrical și cel de neonatologie unde lucrați:

|                                                                                                                                                                                                                                                            |                  |                                                        |                                                               |
|------------------------------------------------------------------------------------------------------------------------------------------------------------------------------------------------------------------------------------------------------------|------------------|--------------------------------------------------------|---------------------------------------------------------------|
|                                                                                                                                                                                                                                                            | 1) Este adecvată | 2) Este adecvată, dar are nevoie de unele îmbunătățiri | 3) Nu este adecvată, are nevoie de îmbunătățiri semnificative |
| B1. Infrastructura fizică este adecvată (de exemplu, apa curentă, electricitatea, salubritatea, zonele pentru nou născuții cu probleme de sănătate sunt disponibile și proiectate funcțional pentru a oferi îngrijiri esențiale)                           |                  |                                                        |                                                               |
| B2. Echipamentele și consumabilele adecvate sunt furnizate pentru îngrijirea esențială în cantități suficiente și în orice moment                                                                                                                          |                  |                                                        |                                                               |
| B3. Ghiduri sau protocoale scrise, comprehensive privind procedurile clinice recomandate pentru <b>urgențele nou-născuților</b> sunt actualizate pe baza celor mai recente dovezi (Medicină bazată pe dovezi) și sunt disponibile pentru întregul personal |                  |                                                        |                                                               |
| B4. Este organizată o <b>supervizare suportivă</b> eficientă în cadrul serviciului pentru a îmbunătăți abilitățile practice personale (de exemplu, existența unor îndrumători).                                                                            |                  |                                                        |                                                               |
| B5. Când este necesar, sistemul de <b>transfer și transport</b> este funcțional și oferă îngrijire la o calitate adecvată (de exemplu, sigură, disponibilă fără întârzieri, 24h / 7 zile)                                                                  |                  |                                                        |                                                               |



|                                                                                                                                                                                         |                  |                                                        |                                                               |
|-----------------------------------------------------------------------------------------------------------------------------------------------------------------------------------------|------------------|--------------------------------------------------------|---------------------------------------------------------------|
| B6. Ați participat la evenimente de formare eficiente și specifice pentru a vă consolida abilitățile (răspundeți da, dacă ați participat cel puțin un eveniment în ultimii trei ani)... | 1) Este adecvată | 2) Este adecvată, dar are nevoie de unele îmbunătățiri | 3) Nu este adecvată, are nevoie de îmbunătățiri semnificative |
| în modul de gestionare a resuscitării nou-născutului?                                                                                                                                   |                  |                                                        |                                                               |

**Vă rugăm să fiți atenți:** sunt 3 întrebări diferite pentru fiecare din cel 3 posibile activități: moașe care lucrează în domeniul îngrijirii materne/neonatale, personal care lucrează în domeniul îngrijirii materne, personal care lucrează în domeniul îngrijirii neonatale.

Personal care lucrează în domeniul **îngrijirii materne:**

**Q1. Vă rugăm să ne oferiți sugestii și / sau comentarii pentru a îmbunătăți îngrijirea nou-născutului fără complicații și a îngrijirii celor mai grave urgențe neonatale.**

Personal care lucrează în domeniul **îngrijirii neonatale:**

**Q1. Vă rugăm să ne oferiți sugestii și / sau comentarii pentru a îmbunătăți îngrijirea nou-născutului fără complicații și a îngrijirii celor mai grave urgențe neonatale.**

Moașe care lucrează în domeniul **îngrijirii materne/neonatale:**

**Q1. Vă rugăm să ne oferiți sugestii și / sau comentarii pentru a îmbunătăți îngrijirea femeilor însărcinate sănătoase, a îngrijirii celor mai grave urgențe obstetricale, și/ sau pentru îmbunătățirea îngrijirii unui nou-născut fără complicații și / sau a îngrijirii celor mai grave urgențe neonatale.**

## C. Organizarea muncii, managementul datelor și comunicarea

În legătură cu organizarea muncii, în zona / departamentul matern și neonatal în care lucrați:

|                                                                                                                                                                       | 1) Este adecvată | 2) Este adecvată, dar are nevoie de unele îmbunătățiri | 3) Nu este adecvată, are nevoie de îmbunătățiri semnificative |
|-----------------------------------------------------------------------------------------------------------------------------------------------------------------------|------------------|--------------------------------------------------------|---------------------------------------------------------------|
| C1. Există un număr suficient de cadre medicale pentru a asigura îngrijirea adecvată                                                                                  |                  |                                                        |                                                               |
| C2. Rolurile și responsabilitățile fiecărui cadru medical sunt scrise în mod clar și definite comprehensiv                                                            |                  |                                                        |                                                               |
| C3. Predarea între schimburi de tură este eficientă și completă în toate aspectele relevante ale îngrijirii, respectând și protejând confidențialitatea informațiilor |                  |                                                        |                                                               |

În legătură cu **colectarea și utilizarea datelor**, în secția / departamentul matern și neonatal în care lucrați:

|                                                                                                                                                                                                                                                                                                                                                                                                                             | 1) Este adecvată | 2) Este adecvată, dar are nevoie de unele îmbunătățiri | 3) Nu este adecvată, are nevoie de îmbunătățiri semnificative |
|-----------------------------------------------------------------------------------------------------------------------------------------------------------------------------------------------------------------------------------------------------------------------------------------------------------------------------------------------------------------------------------------------------------------------------|------------------|--------------------------------------------------------|---------------------------------------------------------------|
| C4. Există un sistem de colectare a datelor clinice (de exemplu, un registru scris sau computerizat) complet, precis, corect, fiabil și ușor de consultat/accesat                                                                                                                                                                                                                                                           |                  |                                                        |                                                               |
| C5. Există o listă de indicatori pre-definiți ai calității îngrijirii (de exemplu, frecvența următoarelor practici: operații cezariene folosind clasificarea Robson, epiziotomii, manevra Kristeller, inducerea nașterii, alăptare, contact piele la piele, îngrijire de tip cangur etc.), utilizată pentru a compila rapoarte statistice astfel încât să poată fi diseminată în mod regulat și discutată de către personal |                  |                                                        |                                                               |

În legătură cu **comunicarea**, în secția/departamentul matern și/sau neonatal unde lucrați:

|                                                                                                                                                                                                                                                                          | 1) Este adecvată | 2) Este adecvată, dar are nevoie de unele îmbunătățiri | 3) Nu este adecvată, are nevoie de îmbunătățiri semnificative |
|--------------------------------------------------------------------------------------------------------------------------------------------------------------------------------------------------------------------------------------------------------------------------|------------------|--------------------------------------------------------|---------------------------------------------------------------|
| C6. În general, cadrele medicale au o comunicare eficientă cu gravidele și familiile acestora (de exemplu, se asigură că aceștia înțeleg și / sau le oferă oportunitatea de a pune întrebări și de a-și exprima liber opiniile) folosind un limbaj simplu și accesibil.  |                  |                                                        |                                                               |
| C7. Gravidelor și familiilor lor li se oferă materiale educaționale clare legate de sănătatea maternă și a nou-născuților, într-o formă accesibilă (scrisă, digitală sau grafică), disponibilă în toate limbile comunităților deservite de unitatea maternă / neonatală. |                  |                                                        |                                                               |
| C8. Ați participat la cursuri practice eficiente pentru a vă consolida abilitățile specifice de comunicare și consiliere interpersonală (de exemplu, de formulare a cererii de consimțământ informat) (cel puțin un eveniment de formare în ultimii trei ani)            |                  |                                                        |                                                               |

Q2. Vă rugăm să oferiți sugestii și / sau comentarii pentru a îmbunătăți organizarea muncii, colectarea și utilizarea datelor și comunicarea.

## D. Calitatea îngrijirii și practicilor efectuate

În legătură cu **sprijinul emoțional, psihologic și în luarea deciziilor** în secția / departamentul matern și neonatal în care lucrați:

|                                                                                                                                                                                                                                                                                                                                                                                                                                   | 1) Este adecvată | 2) Este adecvată, dar are nevoie de unele îmbunătățiri | 3) Nu este adecvată, are nevoie de îmbunătățiri semnificative |
|-----------------------------------------------------------------------------------------------------------------------------------------------------------------------------------------------------------------------------------------------------------------------------------------------------------------------------------------------------------------------------------------------------------------------------------|------------------|--------------------------------------------------------|---------------------------------------------------------------|
| D1. Este garantată tuturor femeilor posibilitatea de a avea un însoțitor la alegere, pentru cât de mult timp consideră necesar (de exemplu, pe parcursul tuturor fazelor travaliului, nașterii și perioadei postpartum)                                                                                                                                                                                                           |                  |                                                        |                                                               |
| D2. Ați participat la cursuri practice eficiente pentru a consolida abilitățile specifice în oferirea de sprijin emoțional femeilor și pentru creșterea controlului acestora în timpul nașterii și / sau post-partum (de exemplu, înțelegerea influențelor stării emoționale asupra eliberării de oxitocină și prezentarea metodelor practice de gestionare a emoțiilor) ( cel puțin un eveniment de formare în ultimii trei ani) |                  |                                                        |                                                               |

În ceea ce privește **asigurarea intimității femeilor**, în secția/ departamentul matern și neonatal unde lucrați:

|                                                                                                                                                                                                                                                                  | 1) Este adecvată | 2) Este adecvată, dar are nevoie de unele îmbunătățiri | 3) Nu este adecvată, are nevoie de îmbunătățiri semnificative |
|------------------------------------------------------------------------------------------------------------------------------------------------------------------------------------------------------------------------------------------------------------------|------------------|--------------------------------------------------------|---------------------------------------------------------------|
| D3. Este disponibilă o Infrastructura adecvată pentru a asigura intimitatea femeilor și a familiilor acestora (de exemplu, camere private pentru vizite, disponibilitatea perdelelor sau a paravanelor între paturi, un număr adecvat de paturi per cameră etc.) |                  |                                                        |                                                               |
| D4. Sunt puse în aplicare toate măsurile necesare pentru a garanta intimitatea și confidențialitatea femeilor și a familiilor acestora (de exemplu, informațiile private sunt discutate într-un mod în care să nu fie auzite de alte persoane etc.)              |                  |                                                        |                                                               |

Q3. Vă rugăm să oferiți sugestiile și / sau comentariile dvs. pentru a îmbunătăți suportul emoțional, psihologic și în luarea deciziilor precum și pentru protecția intimității femeilor.

**Vă rugăm să rețineți:** există două versiuni diferite ale întrebării D5.1 pentru cele trei căi de chestionar posibile; moașele care lucrează atât în zona maternă, cât și în cea neonatală ar trebui să răspundă la ambele versiuni.

În ceea ce **privește dreptul femeilor la alegeri informate** în secția/ departamentul matern și neonatal în care lucrați:

Personal care lucrează în domeniul **îngrijirii materne:**

|                                                                                                                                                                  |                  |                                                        |                                                               |
|------------------------------------------------------------------------------------------------------------------------------------------------------------------|------------------|--------------------------------------------------------|---------------------------------------------------------------|
| D5.1. Există materiale tipărite/în format digital care servesc ca ghiduri pentru personalul medical și care descriu în mod comprehensiv riscurile și beneficiile | 1) Este adecvată | 2) Este adecvată, dar are nevoie de unele îmbunătățiri | 3) Nu este adecvată, are nevoie de îmbunătățiri semnificative |
| a) Operației cezariene                                                                                                                                           |                  |                                                        |                                                               |
| b) Inducerii travaliului                                                                                                                                         |                  |                                                        |                                                               |

Personal care lucrează în domeniul **îngrijirii neonatale:**

|                                                                                                                                                                  |                  |                                                        |                                                               |
|------------------------------------------------------------------------------------------------------------------------------------------------------------------|------------------|--------------------------------------------------------|---------------------------------------------------------------|
| D5.1. Există materiale tipărite/în format digital care servesc ca ghiduri pentru personalul medical și care descriu în mod comprehensiv riscurile și beneficiile | 1) Este adecvată | 2) Este adecvată, dar are nevoie de unele îmbunătățiri | 3) Nu este adecvată, are nevoie de îmbunătățiri semnificative |
| a) Administrării de vitamina K                                                                                                                                   |                  |                                                        |                                                               |
| b) Profilaxiei oftalmiei neonatale                                                                                                                               |                  |                                                        |                                                               |

În ceea ce privește **dreptul femeilor la alegeri informate** în secția/ departamentul matern și neonatal în care lucrați:

|                                                                                                                                                                                                                                                |                  |                                                        |                                                               |
|------------------------------------------------------------------------------------------------------------------------------------------------------------------------------------------------------------------------------------------------|------------------|--------------------------------------------------------|---------------------------------------------------------------|
|                                                                                                                                                                                                                                                | 1) Este adecvată | 2) Este adecvată, dar are nevoie de unele îmbunătățiri | 3) Nu este adecvată, are nevoie de îmbunătățiri semnificative |
| D5.2. Sunt disponibile sesiuni regulate de orientare pentru femei în timpul sarcinii, cu scopul de a informa mai bine gravidele asupra procedurilor care necesită consimțământ                                                                 |                  |                                                        |                                                               |
| D6. Ați participat la cursuri practice eficiente despre cum să informați în mod adecvat femeile și să încurajați alegerile informate cu privire la procedurile cheie legate de naștere (cel puțin un eveniment de formare în ultimii trei ani) |                  |                                                        |                                                               |

Având în vedere alte aspecte **ale calității îngrijirii**, în secția/ departamentul matern și neonatal în care lucrați:

|                                                                                                                                      |                  |                                                        |                                                               |
|--------------------------------------------------------------------------------------------------------------------------------------|------------------|--------------------------------------------------------|---------------------------------------------------------------|
|                                                                                                                                      | 1) Este adecvată | 2) Este adecvată, dar are nevoie de unele îmbunătățiri | 3) Nu este adecvată, are nevoie de îmbunătățiri semnificative |
| D7. Există o echipă în departamentul / unitatea dvs. dedicată îmbunătățirii calității îngrijirii și echipa este operațională în fapt |                  |                                                        |                                                               |

|                                                                                                                                                                                                                                                                         |  |  |  |
|-------------------------------------------------------------------------------------------------------------------------------------------------------------------------------------------------------------------------------------------------------------------------|--|--|--|
| D8. Ședințele sunt organizate, cel puțin o dată pe săptămână, pentru a discuta cele mai relevante cazuri clinice cu toate cadrele medicale implicate în îngrijire                                                                                                       |  |  |  |
| D9. În cazul decesului matern și / sau neonatal, sunt organizate ședințe / audituri deschise și constructive, cu toate cadrele medicale implicate în îngrijire, pentru a analiza cazul și a agreea asupra acțiunilor de îmbunătățire a calității îngrijirilor           |  |  |  |
| D10. Ați participat la evenimente de formare eficiente și specifice pe tema drepturilor femeilor și nou-născuților în timpul nașterii și în perioada postnatală în unitatea medicală în care lucrați (cel puțin un eveniment de formare în ultimii trei ani)            |  |  |  |
| D11. Ați participat la cursuri practice eficiente și specifice privind tehnicile de ameliorare a durerii gravidei (farmacologice și non-farmacologice) și / sau prevenția / managementul durerii nou-născuților (cel puțin un eveniment de formare în ultimii trei ani) |  |  |  |

Q4. Vă rugăm să oferiți sugestii și / sau comentarii de îmbunătățire a drepturilor femeilor la o alegere informate și la alte aspecte legate de calitatea îngrijirii

|  |
|--|
|  |
|--|

## E. COVID-19: pregătire și răspuns

De la începutul pandemiei COVID-19, care a fost nivelul de **pregătire și răspuns** în aria/ departamentul matern și neonatal în care lucrați, în ceea ce privește elementele enumerate mai jos:

|                                                                                                                                                                                                                                     | 1) Existent și / sau adecvat de la începutul pandemiei | 2) Nu există întotdeauna și / sau nu este pe deplin adecvat (de exemplu, au lipsit în primele faze ale pandemiei) | 3) Nu a existat niciodată și / sau nu a fost niciodată adecvat de la începutul pandemiei până în prezent |
|-------------------------------------------------------------------------------------------------------------------------------------------------------------------------------------------------------------------------------------|--------------------------------------------------------|-------------------------------------------------------------------------------------------------------------------|----------------------------------------------------------------------------------------------------------|
| E1. Pentru a reduce riscul de infecție, a fost stabilit un circuit special pentru pacienții cu COVID-19 suspectat / confirmat din momentul în care intră în secția/ secția maternă și / sau neonatală                               |                                                        |                                                                                                                   |                                                                                                          |
| E2. Echipamentele individuale de protecție (de exemplu măști, mănuși, halate) pentru cadrele medicale au fost distribuite în mod regulat în număr suficient                                                                         |                                                        |                                                                                                                   |                                                                                                          |
| E3. A fost pus la dispoziție un număr adecvat de dozatoare de igienă a mâinilor (echipate cu apă, săpun, prosop de hârtie sau soluție de alcool) funcționale și accesibile tuturor cadrelor medicale, femeilor și rudelor acestora. |                                                        |                                                                                                                   |                                                                                                          |

|                                                                                                                                                                                                                                                                                                       |  |  |  |
|-------------------------------------------------------------------------------------------------------------------------------------------------------------------------------------------------------------------------------------------------------------------------------------------------------|--|--|--|
| E4. Indicații clare și actualizate pe baza recomandărilor internaționale (de exemplu OMS, FIGO, NICE, RCOG etc.) specifice asistenței pentru gravide și / sau nou-născuți au fost puse la dispoziția tuturor cadrelor medicale                                                                        |  |  |  |
| E5. Echipamentele și consumabilele pentru recoltarea testelor de diagnostic pentru COVID-19 (de exemplu, recoatoare nazofaringiene și reactivi) au fost puse la dispoziție în cantități suficiente pentru toate cazurile suspectate atât pentru gravide/ nou-născuți, cât și pentru cadrele medicale. |  |  |  |
| E6. Instruirea adecvată a personalului medical care include procedurile cheie impuse de pandemia COVID-19 (de exemplu, prevenirea transmiterii, utilizarea adecvată a echipamentului de protecție individuală etc.) a fost pusă la dispoziția tuturor cadrelor medicale                               |  |  |  |

De la începutul pandemiei COVID-19, s-au întâmplat vreodată următoarele situații, în secția/ departamentul matern și neonatal în care lucrați?

|                                                                                                                                                                                                                                       | 1) Nu s-au întâmplat niciodată | 2) S-au întâmplat în timpul pandemiei COVID-19 (în anumite faze selectate, sau pe toată durata) | 3) S-au întâmplat independent de pandemia COVID-19 |
|---------------------------------------------------------------------------------------------------------------------------------------------------------------------------------------------------------------------------------------|--------------------------------|-------------------------------------------------------------------------------------------------|----------------------------------------------------|
| E7. Închiderea secțiilor de maternitate și / sau reducerea numărului de servicii de rutină (de exemplu, consultații ambulatorii, controale ecografice, spitalizare de zi) și / sau reducerea paturilor pentru gravide sau nou-născuți |                                |                                                                                                 |                                                    |
| E8. Număr insuficient de cadre medicale pentru a oferi îngrijirile esențiale materne și pentru nou-născuți                                                                                                                            |                                |                                                                                                 |                                                    |
| E9. Reducerea la tăcere (cenzura) a personalului pentru a evita raportarea unor proceduri clinice și / sau administrative inadecvate                                                                                                  |                                |                                                                                                 |                                                    |

E10. De la începutul pandemiei COVID-19, ați întâmpinat vreuna din următoarele situații în zona / departamentul matern și neonatal în care lucrați?

|                                                                                              | 1) Nu s-au întâmplat niciodată | 2) S-au întâmplat în timpul pandemiei COVID-19 (în anumite faze selectate, sau pe toată durata) | 3) S-au întâmplat independent de pandemia COVID-19 |
|----------------------------------------------------------------------------------------------|--------------------------------|-------------------------------------------------------------------------------------------------|----------------------------------------------------|
| E10a. Creșterea medicalizării nașterii (de exemplu, utilizarea inadecvată a oxitocinei, rata |                                |                                                                                                 |                                                    |

|                                                                                                                                                                                                                                                                                                                  |  |  |  |
|------------------------------------------------------------------------------------------------------------------------------------------------------------------------------------------------------------------------------------------------------------------------------------------------------------------|--|--|--|
| crescută de epiziotomii, nașterea instrumentală și / sau operațiile cezariene etc.)                                                                                                                                                                                                                              |  |  |  |
| E10b. Restricționarea accesului asupra însoțitorului ales, în absența indicațiilor clinice clare                                                                                                                                                                                                                 |  |  |  |
| E10c. Limitări ale libertății de mișcare în timpul travaliului, în absența indicațiilor clinice clare                                                                                                                                                                                                            |  |  |  |
| E10d. Limitări ale opțiunilor de analgezie (farmacologice și non-farmacologice) tuturor femeilor care o solicită, în toate fazele travaliului                                                                                                                                                                    |  |  |  |
| E10e. Limitări ale rooming-in-ului, în absența indicațiilor clinice clare                                                                                                                                                                                                                                        |  |  |  |
| E10f. Limitarea alăptării, în absența indicațiilor clinice clare (vă rugăm să țineți cont de faptul că, în prezent, ghidurile internaționale nu indică pozitivitatea COVID-19 fără boală severă ca indicație clinică clară pentru a limita alăptarea)                                                            |  |  |  |
| E10g. Limitări ale contactului piele pe piele în prima oră după naștere, în absența indicațiilor clinice clare (vă rugăm să țineți cont de faptul că, în prezent, ghidurile internaționale nu indică pozitivitatea COVID fără boală severă ca indicație clinică clară pentru a limita contactul pielea pe piele) |  |  |  |

Q5. Vă rugăm să oferiți sugestii și / sau comentarii pentru a îmbunătăți nivelul de pregătire și răspuns în secția/ departamentul matern și neonatal în care lucrați în timpul pandemiei COVID-19.

|  |
|--|
|  |
|--|

## F. Considerații finale

F1. În general, credeți că secția/ departamentul în care lucrați a răspuns în mod adecvat la pandemia COVID-19?

- 1) Da, secția/ departamentul de obstetrică și neonatologie au răspuns în mod adecvat
- 2) Da, dar răspunsul necesită îmbunătățiri
- 3) Nu, răspunsul necesită îmbunătățiri semnificative

F2. Considerați ca nivelul de stres resimțit de dvs în legatura cu activitatea profesională s-a modificat în timpul pandemiei COVID-19?

- 1) A crescut semnificativ
- 2) A crescut ușor
- 3) Nu s-a schimbat
- 4) A scăzut ușor
- 5) A scăzut semnificativ

F3. În general, de la începutul pandemiei COVID-19 și până acum, cât de mulțumit sunteți de activitatea dvs. la locul de muncă?

|                      |               |           |             |                    |
|----------------------|---------------|-----------|-------------|--------------------|
| 1- foarte nemulțumit | 2- nemulțumit | 3- neutru | 4- mulțumit | 5- foarte mulțumit |
|----------------------|---------------|-----------|-------------|--------------------|

## G. Date socio-demografice

G1. De câți ani lucrați în domeniul îngrijirii materne sau neonatale?

- 1) De mai puțin de 5
- 2) Între 5 și 10
- 3) Pe peste 10

G2. În ce țară lucrați? (Vă rugăm să alegeți țara)

Lista celor 53 de regiuni europene ale OMS.

Dacă HW-ul a răspuns din următoarele țări, va fi disponibilă o întrebare suplimentară care specifică regiunea: Bosnia, Croația, Franța, Germania, Italia, Norvegia, Portugalia, România, Serbia, Spania, Suedia, Marea Britanie.

G2a. Studiul cuprinde exclusiv regiunea Europeana a OMS, care include 53 de țări, acoperind o arie geografică vastă de la oceanul Atlantic la oceanul Pacific.

Dacă nu regăsiți țara dumneavoastră pe listă, vă rugăm să menționați din ce țară sunteți.

G3. Câți ani aveți?

- 1) 20-29
- 2) 30-39
- 3) 40-49
- 4) 50-59
- 5) 60-69
- 6) >=70

G4. Cum ați descrie genul dvs.?

- 1) Masculin
- 2) Femeie
- 3) Alte
- 4) Preferați să vă autodescrieți non-binar/ gender-fluid/agender
- 5) Prefer să nu răspund

G5. G5. Data completării chestionarului (data-lună-an): \_\_\_\_\_

Acest lucru ne va ajuta să interpretăm rezultatele în funcție de diferitele faze ale pandemiei COVID-19 din fiecare țară.

G6. Doriți să primiți prin e-mail rezultatele acestui studiu după ce acesta a fost încheiat?

Informațiile vor fi gestionate în concordanță cu recomandările privind procesarea datelor cu caracter personal și adresa dvs de email nu va fi publicată în niciun moment și nici nu va fi împărtășită terților.

- 1) Da (→ I7a)
- 2) Nu

G6a. Adresa dvs. de e-mail nu va fi corelată în niciun fel de răspunsurile la acest sondaj.

În conformitate cu și în sensul articolelor 13 și 23 din Decretul legislativ nr. 196/2003, oferindu-mi contactul prin e-mail în acest formular, legat de prelucrarea datelor cu caracter personal conform metodelor și în limitele stabilite în raportul din politica menționată mai sus:

*“Ofer voluntar e-mailul meu de contact pentru a primi rezultatele acestui sondaj după ce este terminat”*

\_\_\_\_\_

G7. Cum ați aflat de acest studiu? (alegeți toate variantele de răspuns care se aplică)



- 1) Platforma de socializare pe care sunteți activ (Facebook / Instagram)
- 2) Căutare pe internet (de exemplu, Google)
- 3) E-mail primit de la prieten / familie / serviciu / coleg
- 4) Din auzite
- 5) Presă (de exemplu, radio, presa scrisă, TV)
- 6) Altele (vă rugăm să specificați)

Q6. Vă rugăm să ne oferiți sugestiile dvs. de îmbunătățire a calității îngrijirii materne și neonatale oferite în secția / departamentul de obstetrică și/sau neonatologie unde lucrați și / sau pentru a îmbunătăți acest sondaj

**Apăsând butonul „Aplică” de mai jos, veți trimite răspunsurile dvs.**

**Dacă doriți să contactați echipa de cercetare din țara dvs., vă rugăm să descărcați fișierul de mai jos.**

**Ați terminat: vă mulțumim pentru timpul dedicat finalizării acest sondaj.  
Vă dorim o zi bună!**
